1

2

3

4

5

6 **Evaluation of DNA extraction protocols from liquid-based cytology specimens**  
7 **for studying cervical microbiota**

8

9 Takeo Shibata,<sup>a,b</sup> Mayumi Nakagawa,<sup>a</sup> Hannah N. Coleman,<sup>a</sup> Sarah M. Owens,<sup>c</sup> William W.  
10 Greenfield,<sup>d</sup> Toshiyuki Sasagawa,<sup>b</sup> Michael S. Robeson II<sup>c</sup>

11

12 <sup>a</sup>Department of Pathology, University of Arkansas for Medical Sciences, Little Rock, AR, USA

13 <sup>b</sup>Department of Obstetrics and Gynecology, Kanazawa Medical University, Uchinada, Ishikawa,  
14 Japan

15 <sup>c</sup>Biosciences Division, Argonne National Laboratory, Lemont, IL, USA

16 <sup>d</sup>Department of Obstetrics and Gynecology, University of Arkansas for Medical Sciences, Little  
17 Rock, AR, USA

18 <sup>e</sup>Department of Biomedical Informatics, University of Arkansas for Medical Sciences, Little  
19 Rock, AR, USA

20

21 Corresponding author: Michael S. Robeson II

22 Tel: 501-526-4242, Fax: 501-526-5964

23 Email: MRobeson@uams.edu

24 **Abstract**

25 Cervical microbiota (CM) are considered an important factor affecting the progression of  
26 cervical intraepithelial neoplasia (CIN) and are implicated in the persistence of human  
27 papillomavirus (HPV). Collection of liquid-based cytology (LBC) samples is routine for cervical  
28 cancer screening and HPV genotyping, and can be used for long-term cytological biobanking.  
29 Herein, we investigate the feasibility of leveraging LBC specimens for use in CM surveys by  
30 amplicon sequencing. As methodological differences in DNA extraction protocols can  
31 potentially bias the composition of microbiota, we set out to determine the performance of four  
32 commonly used DNA extraction kits (ZymoBIOMICS DNA Miniprep Kit; QIAamp PowerFecal  
33 Pro DNA Kit; QIAamp DNA Mini Kit; and IndiSpin Pathogen Kit) and their ability to capture  
34 the diversity of CM from LBC specimens. LBC specimens from 20 patients (stored for  $716 \pm$   
35 105 days) with cervical intraepithelial neoplasia (CIN) 2/3 or suspected CIN2/3 were each  
36 aliquoted for extraction by each of the four kits. We observed that, regardless of the extraction  
37 protocol used, all kits provided equivalent accessibility to the cervical microbiome, with some  
38 minor differences. For example, the ZymoBIOMICS kit appeared to differentially increase  
39 access of several more microbiota compared to the other kits. Potential kit contaminants were  
40 observed as well. Approximately 80% microbial genera were shared among all DNA extraction  
41 protocols. The variance of microbial composition per individual was larger than that of the DNA  
42 extraction protocol used. We also observed that HPV16 infection was significantly associated  
43 with community types that were not dominated by *Lactobacillus iners*.

44

45 **Importance**

46 Collection of LBC specimens is routine for cervical cancer screening and HPV genotyping, and  
47 can be used for long-term cytological biobanking. We demonstrated that LBC samples, which  
48 had been under prolonged storage prior to DNA extraction, were able to provide a robust  
49 assessment of the CM and its relationship to HPV status, regardless of the extraction kit used.  
50 Being able to retroactively access the CM from biobanked LBC samples, will allow researchers  
51 to better interrogate historical interactions between the CM and its relationship to CIN and HPV.  
52 This alone has the potential to bring CM research one-step closer to the clinical practice.

53

54 **Keywords;** cervical microbiota, DNA extraction, HPV, CIN, liquid-based cytology

## 55 **Introduction**

56 High-throughput sequencing (HTS) technology of 16S rRNA gene amplicon sequences  
57 has made it possible to better understand the relationships between cervicovaginal microbiota  
58 and human papillomavirus (HPV) infection (1) (2) (3) (4) (5) and HPV-related diseases (6) (7)  
59 (8) (9) (10). Cervicovaginal microbiota are considered to be an important factor affecting the  
60 progress of cervical intraepithelial neoplasia (CIN) (6) (7) (8) (9) and are implicated in the  
61 persistence of high-risk HPV (HR-HPV) (1) (2) and low-risk HPV (LR-HPV) (3). For example,  
62 the phyla *Actinobacteria* and *Fusobacteria* were enriched in HR-HPV positive environment (4)  
63 while the phyla *Actinobacteria*, *Proteobacteria*, and *Fusobacteria* in low-risk HPV (LR-HPV)  
64 (3). Additionally, *Lactobacillus iners*-dominant samples are associated with both HR-HPV and  
65 LR-HPV (5). Moreover, it has been shown that CIN risk was increased when the cervical  
66 microbes *Atopobium vaginae*, *Gardnerella vaginalis*, and *Lactobacillus iners* were present with  
67 HR-HPV (10). The cervicovaginal microbiome specified by *Lactobacillus*-dominant type or non-  
68 *Lactobacillus*-dominant type has been shown to interact with the immune system (7) (11).  
69 Inflammatory cytokines, such as Interleukin (IL)-1 $\alpha$  and IL-18, were increased in non-  
70 *Lactobacillus*-dominant community types of reproductive-aged healthy women (11). In the  
71 analysis of patients with cervical cancer, non-*Lactobacillus*-dominant community types were  
72 positively associated with chemokines such as interferon gamma-induced protein 10 (IP-10) and  
73 soluble CD40-ligand activating dendritic cells (DCs) (7). The metabolism of the cervicovaginal  
74 microbiome may be a substantial contributing factor to maternal health during pregnancy,  
75 although the mechanism is still unclear (12).

76 Little has been reported on the utility of liquid-based cytology (LBC) samples for use in  
77 cervical microbiome studies. Conventionally, microbiome sample collection methods entail the

78 use of swabs (13) or self-collection of vaginal discharge (14). To obtain a non-biased and broad  
79 range of cervical microbiota, DNA extraction should be optimized for a range of difficult-to-  
80 lyse-bacteria, *e.g. Firmicutes, Actinobacteria, and Lactobacillus* (13) (15) (16) (17) (18).

81 LBC samples are promising for cervicovaginal microbiome surveys, as they are an  
82 already established method of long-term cytological biobanking (19). In clinical practice,  
83 cervical cytology for cervical cancer screening or HPV genotyping is widely performed using a  
84 combination of cervical cytobrushes and LBC samples such as ThinPrep (HOLOGIC) or  
85 SurePath (BD). An LBC specimen can be used for not only cytological diagnosis but also  
86 additional diagnostic tests such as HPV, *Chlamydia, Neisseria gonorrhoeae, and Trichomonas*  
87 infection (20) (21) (22).

88 The ability to characterize microbial communities, as commonly assessed by 16S rRNA  
89 gene sequencing, can be biased as a result of methodological differences of cell lysis and DNA  
90 extraction protocols (23) (24) (25). Herein, we compare four different commercially available  
91 DNA extraction kits in an effort to assess their ability to characterize the cervical microbiota of  
92 LBC samples. Additionally, we examine the relationship between HPV infection and the  
93 composition of cervical microbiota.

94 **Materials and Methods**

95 **Ethics**

96 This study was approved by the Institutional Review Board at the University of Arkansas for  
97 Medical Sciences (IRB number 202790).

98

99 **Sampling of cervical microbiome**

100 LBC specimens were obtained from 20 patients enrolled in a Phase II clinical trial of an HPV  
101 therapeutic vaccine (NCT02481414). In order to be eligible, participants had to have high grade  
102 squamous intraepithelial lesions (HSILs) or cannot rule out HSILs in cervical cytology or  
103 CIN2/3 in cervical biopsy. Those who qualified for the study based on their cervical cytology  
104 underwent cervical biopsy, and they qualified for vaccination if the results were CIN2/3. The  
105 cervical cytology specimens in this current study were collected before the vaccination and  
106 reserved in the vial of the ThinPrep Pap Test (HOLOGIC) as described in Ravilla *et al.* 2019  
107 (26). The storage period from sample collection to DNA extraction was  $716 \pm 105$  days in this  
108 study.

109

110 **HPV genotyping**

111 HPV-DNA was detected by Linear Array HPV Genotyping Test (Roche Diagnostics) which can  
112 detect up to 37 HPV genotypes including 13 HR-HPV genotypes (16, 18, 31, 33, 35, 39, 45, 51,  
113 52, 56, 58, 59, and 68) and 24 LR-HPV genotypes (6, 11, 26, 40, 42, 53, 54, 55, 61, 62, 64, 66,  
114 67, 69, 70, 71, 72, 73, 81, 82, 83, 84, IS39, and CP6108) using ThinPrep solution  
115 (<https://diagnostics.roche.com/global/en/products/params/linear-array-hpv-genotyping.html>).

116

## 117 **DNA extraction protocols**

118 We selected four commercially available DNA extraction kits as the candidates for comparison:  
119 ZymoBIOMICS DNA Miniprep Kit (Zymo Research, D4300), QIAamp PowerFecal Pro DNA  
120 Kit (QIAGEN, 51804), QIAamp DNA Mini Kit (QIAGEN, 51304), and IndiSpin Pathogen Kit  
121 (Indical Bioscience, SPS4104). These kits have been successfully used in a variety of human  
122 cervical, vaginal, and gut microbiome surveys (10) (19) (27). We'll subsequently refer to each of  
123 these kits in abbreviated form as follows: ZymoBIOMICS, PowerFecalPro, QIAampMini, and  
124 IndiSpin. The protocols and any modifications are outlined in Table 1.

125       Each LBC sample was dispensed into four separate 2 mL sterile collection tubes  
126 (dispensed sample volume = 500  $\mu$ L) to create four cohorts of 20 DNA extractions (Fig. 1). Each  
127 extraction cohort was processed through one of the four kits above. A total of 80 extractions (4  
128 kits  $\times$  20 patients) were prepared for subsequent analyses. Applied sample volume of ThinPrep  
129 solution was 300  $\mu$ L for ZymoBIOMICS, 300  $\mu$ L for PowerFecalPro, and 200  $\mu$ L for  
130 QIAampMini, and 300  $\mu$ L for IndiSpin. The sample volume was standardized to 300  $\mu$ L as long  
131 as the manufacturer's instructions allowed to do so. DNA extraction for all samples was  
132 performed by the same individual who practiced by performing multiple extractions for each kit  
133 before performing the actual DNA extraction on the samples analyzed in this study. Positive  
134 control was mock vaginal microbial communities composed of a mixture of genomic DNA from  
135 the American Type Culture Collection (ATCC MSA1007). Negative control was the ThinPrep  
136 preservation solution without the sample as blank extraction (28).

137

## 138 **Measurement of DNA yield**

139 DNA yield for each method was evaluated by spectrophotometer (Nanodrop One, Thermo  
140 Scientific). Analysis of the DNA yield from IndiSpin was omitted as nucleic acid is used as a  
141 carrier for this kit. The mean DNA yields per 100  $\mu$ L ThinPrep sample volume were compared.

142

### 143 **16S rRNA marker gene sequencing**

144 Controls and the extracted DNA were sent to Argonne National Laboratory (IL, USA) for  
145 amplification and sequencing of the 16S rRNA gene on an Illumina MiSeq sequencing platform.  
146 Paired-end reads from libraries with ~250-bp inserts were generated for the V4 region using the  
147 barcoded primer set: 515FB: 5'-GTGYCAGCMGCCGCGGTAA-3' and 806RB: 5'-  
148 GGACTACNVGGGTWTCTAAT-3' (29) (30) (31) (32)  
149 (<http://www.earthmicrobiome.org/protocols-and-standards/16s/>). MiSeq Reagent Kit v2 (2  $\times$  150  
150 cycles, MS-102-2002) was used.

151

### 152 **Sequence processing and analysis**

153 Initial sequence processing and analyses were performed using QIIME 2 (33), any commands  
154 prefixed by `q2 -` are QIIME 2 plugins. After demultiplexing of the paired-end reads by `q2 -`  
155 `demux`, the imported sequence data was visually inspected via QIIME 2 View  
156 (<https://view.qiime2.org>), to determine the appropriate trimming and truncation parameters for  
157 generating Exact Sequence Variants (ESVs) (34) via `q2 -dada2` (35). Hereafter, ESVs will be  
158 referred to as OTUs (Operational Taxonomic Units). The forward reads were trimmed at 15 bp  
159 and truncated at 150 bp; reverse reads were trimmed at 0 bp and truncated at 150 bp. The  
160 resulting OTUs were assigned taxonomy through `q2 -feature-classifier classify-`  
161 `sklearn`, by using a pre-trained classifier for the amplicon region of interest (36). This enables



162 more robust taxonomic assignment of the OTUs (37). Taxonomy-based filtering was performed  
163 by using `q2-taxa filter-table` to remove any OTUs that were classified as  
164 “Chloroplast”, “Mitochondria”, “Eukaryota”, “Unclassified” and those that did not have at least  
165 a Phylum-level classification. We then performed additional quality filtering via `q2-quality-`  
166 `control`, and only retained OTUs that had at least a 90% identity and 90% query alignment to  
167 the SILVA reference set (38). Then `q2-alignment` was used to generate a *de novo* alignment  
168 with MAFFT (39) which was subsequently masked by setting `max-gap-frequency 1`  
169 `min-conservation 0.4`. Finally, `q2-phylogeny` was used to construct a midpoint-rooted  
170 phylogenetic tree using IQ-TREE (40) with automatic model selection using ModelFinder (41).  
171 Unless specified, subsequent analyses were performed after removing OTUs with a frequency of  
172 less than 0.0005% of the total data set (42).

173

#### 174 **Number of reads and OTUs before rarefying**

175 Table 3 highlights the numbers of reads and OTUs among the DNA extraction protocols prior to  
176 rarefying the data. The reads and OTUs assigned to gram-positive and gram-negative was also  
177 shown. The number of “OTUs before rarefying” shown in Table 3 is distinguished from the  
178 “Observed OTUs” after rarefying in Fig. 3 for diversity analysis.

179

#### 180 **Microbiome analysis**

181 To compare the taxonomic profiles among four types of DNA extraction methods (Fig. 1 &  
182 Table 1), the following analyses were performed; (I) bacterial microbiome composition, (II)  
183 detection of common and unique taxa, (III) alpha and beta diversity analysis, and (IV)  
184 identification of specific bacteria retained per DNA extraction method.

185

## 186 **Microbiome composition**

187 We generated the bar plot to exhibit bacterial microbiome composition per DNA extraction

188 method at the family (Fig. 2A left) and genus (Fig. 2A right) taxonomic level. After all count

189 data of taxonomy were converted to relative abundance, the top 10 abundant taxonomic groups

190 in each family and genus level were plotted in colored bar plot (43) (44) (45). Variation of

191 microbiome composition per DNA extraction method or per individual was assessed by the

192 Adonis test (`q2-diversity adonis`) (46) (47).

193

## 194 **Differentially accessible microbiota by DNA extraction protocol**

195 We set out to determine which microbial taxonomic groups were differentially accessible across

196 the sampling protocols by linear discriminant analysis (LDA) effect size (LEfSe) analyses (48).

197 We further assessed the microbial taxa using `jvenn` (49) at family and genus level. The Venn

198 diagram was created after removing OTUs with a frequency of less than 0.005% (42).

199

## 200 **Alpha and beta diversity analyses with or without rarefying**

201 Non-rarefying approaches to determine both alpha (within-sample) and beta (between-sample)

202 diversity was assessed by Species richness using `q2-breakaway` (50) and Aitchison distance

203 using `q2-deicode` (51). These were compared with rarefied data in which we applied Faith's

204 Phylogenetic Diversity, Observed OTUs, Shannon's diversity index, Pielou's Evenness,

205 Unweighted UniFrac distance, Weighted UniFrac distance, Jaccard distance, and Bray-Curtis

206 distances via `q2-diversity` (33). In order to retain data from at least 15 of the 20 patients (*i.e.*

207 75%; four samples from each of the four DNA extraction methods), we set the sampling depth to

208 51,197 reads per sample. Overall our subsequence analysis consisted of 3,071,820 reads (27.6%,  
209 3,071,820 / 11,149,582 reads). All diversity measurements in this study are listed in Table S1.

210

### 211 **Community type and HPV status**

212 In addition to the analysis above, we tested whether the samples clustered by microbiome  
213 composition were related to the patient's clinical and demographic characteristics such as,  
214 cervical biopsy diagnosis, race, and HPV16 status. HPV16 status has been reported to be  
215 associated with both racial differences as well as microbial community types (26) (52) (53) (54).  
216 We employed the Dirichlet Multinomial Mixtures (DMM) (55) model to determine the number  
217 of community types for bacterial cervical microbiome. Then, we clustered samples to the  
218 community type (9) (56). Since vaginal microbiota were reported to be clustered with different  
219 *Lactobacillus sp.* such as *L. crispatus*, *L. gasseri*, *L. iners*, or *L. jensenii* (16) (57), we also  
220 collapsed the taxonomy to the species level and performed a clustering analysis using  
221 “microbiome R package” (45). We then determined which bacterial taxa were differentially  
222 abundant among the patients with or without HPV16 via  $q_2$ -aldex2 (58) and LefSe (48).

223

### 224 **General statistical analysis**

225 All data are presented as means  $\pm$  standard deviation (SD). Comparisons were conducted with  
226 Fisher's exact test or Dunn's test with Benjamini-Hochberg-adjustment (59) or Wilcoxon test  
227 with Benjamini-Hochberg-adjustment or pairwise PERMANOVA when appropriate. A p value <  
228 0.05 or a q value < 0.05 was considered statistically significant.

229

### 230 **Data availability**

- 231 MIMARKS compliant (60) DNA sequencing data are available via the Sequence Read Archive  
232 (SRA) at the National Center for Biotechnology Information (NCBI), under the BioProject  
233 Accession: PRJNA598197.

234 **Results**

235 **Patients characteristics**

236 The age of the patients was  $31.4 \pm 5.0$  years. The distribution of race was 15% African American  
237 ( $n = 3$ ) and 50% Caucasian ( $n = 10$ ), and 35% Hispanic ( $n = 7$ ). Cervical histology was 40%  
238 CIN2 ( $n = 8$ ), 50% CIN3 ( $n = 10$ ), and 10% benign ( $n = 2$ ). HPV genotype were 50% HPV16  
239 positive ( $n = 10$ ), 10% HPV18 positive ( $n = 2$ ), 90% HR-HPV positives ( $n = 18$ ). Patient  
240 characteristics were summarized in Table 2.

241

242 **DNA yield**

243 DNA yield per 100  $\mu\text{L}$  ThinPrep solution were  $0.09 \pm 0.06$   $\mu\text{g}$  in ZymoBIOMICS,  $0.04 \pm 0.01$   $\mu\text{g}$   
244 in PowerFecalPro, and  $0.21 \pm 0.23$   $\mu\text{g}$  in QIAampMini. DNA yield was not calculated for  
245 IndiSpin, as Poly-A Carrier DNA was used. The DNA yield of PowerFecalPro was significantly  
246 lower than that of ZymoBIOMICS (adjusted p value  $< 0.001$ ) and QIAampMini (adjusted p  
247 value  $< 0.001$ ) based on Dunn's test with Benjamini-Hochberg-adjustment (Fig. S1).

248

249 **Number of reads and OTUs before rarefying**

250 We obtained a total of 11,149,582 reads for 80 DNA extractions. The 127,142 reads were  
251 produced from a positive control of mock sample and 1,773 reads from ThinPrep solution as the  
252 negative control. IndiSpin ( $168,349 \pm 57,451$  reads) produced a significantly higher number of  
253 reads compared to PowerFecalPro ( $115,610 \pm 68,201$  reads, p value = 0.020, Dunn's test with  
254 Benjamini-Hochberg-adjustment) as shown in Table 3. Approximately 90% of reads were  
255 assigned to gram-positive bacteria and about 10% of reads were assigned to gram-negative  
256 bacteria across all kits.

257 Prior to rarefying, the ZymoBIOMICS kit captured a greater representation of gram-  
258 negative bacterial OTUs (total 346,  $17.3 \pm 9.8$ ) compared to PowerFecalPro (total 209,  $10.5 \pm$   
259  $10.3$ ,  $p$  value = 0.012, Dunn's test with Benjamini-Hochberg-adjustment, ratio of gram-negative  
260 bacteria: 41.9% vs 33.7%) as shown in Table 3. No significant differences in the number of  
261 OTUs before rarefying was detected for the entire bacterial community or gram-positive bacteria.  
262

### 263 **Microbiome composition per DNA extraction protocol**

264 We analyzed whether differences in DNA extraction methods affect our ability to assess cervical  
265 microbiota composition. The patients can be identified by whether or not they displayed a  
266 *Lactobacillus*-dominant community type (Fig. 2A). Variation between individuals was a  
267 significantly greater influence on the observed microbial composition than was the method of  
268 DNA extraction (Fig. 2A).

269 The following top 10 abundant families are shown in Fig. 2A (left) and constituted  
270 approximately 95.7% of cervical bacteria in all kits (80 DNA extractions); *Lactobacillaceae*  
271 (58.9%), *Bifidobacteriaceae* (13.7%), *Veillonellaceae* (4.8%), *Prevotellaceae* (4.3%), *Family XI*  
272 (3.9%), *Atopobiaceae* (3.0%), *Leptotrichiaceae* (2.5%), *Streptococcaceae* (2.0%),  
273 *Lachnospiraceae* (1.6%), *Ruminococcaceae* (0.9%). The following top 10 abundant genera are  
274 shown in Fig. 2A (right) and constituted approximately 92% of cervical bacteria; *Lactobacillus*  
275 (58.9%), *Gardnerella* (13.6%), *Prevotella* (4.2%), *Megasphaera* (3.7%), *Atopobium* (3.0%),  
276 *Sneathia* (2.5%), *Streptococcus* (1.9%), *Parvimonas* (1.7%), *Shuttleworthia* (1.4%), and  
277 *Anaerococcus* (1.1%).

278

### 279 **Shared and unique microbiota among DNA extraction protocols**

280 All DNA extraction methods were generally commensurate with one another, there were 31 of  
281 41 shared microbes at the family level (Fig. 2B left) and 45 of 57 shared microbes at the genus  
282 level (Fig. 2B right) among the DNA extraction protocols.

283 However, four gram-negative taxa were uniquely detected by ZymoBIOMICS and one  
284 taxon was uniquely detected by QIAampMini both at the genus level (Fig. 2B right). Of the  
285 uniquely detected ZymoBIOMICS OTUs, *Hydrogenophilus*, which was reported as enriched  
286 taxa in LR-HPV positive environment (3), was detected in 14 of the 80 DNA extractions,  
287 consisting of 2,488 reads (0.02% of all kit extractions). *Methylobacterium* was detected in 5 of  
288 the 80 DNA extractions (912 reads; 0.01%). A member of this genus, *Methylobacterium*  
289 *aerolatum*, has been reported to be more abundant in the endocervix than the vagina of healthy  
290 South African women (61). *Bacteroidetes*, which are often reported as enriched taxa in an HIV  
291 positive cervical environment (62), was detected in 12 of the 80 DNA extractions (1,028 reads;  
292 0.01%). *Meiothermus* was detected in 9 of the 80 DNA extractions (882 reads; 0.01%).  
293 *Meiothermus* is not considered to reside within the human environment, and may be an  
294 extraction kit contaminant, as previously reported (63). A unique gram-positive taxa obtained  
295 from the QIAampMini, *Streptomyces*, which was reported to be detected from the cervicovaginal  
296 environment in the study of Kenyan women (64), was detected in 20 of 80 DNA extractions  
297 (6,862 reads; 0.06%). No unique taxa were detected in PowerFecalPro and IndiSpin.

298 Venn diagrams at family levels also exhibited that ZymoBIOMICS detected slightly  
299 more bacterial taxa (four unique taxa) as shown in Fig. 2B (left). These results showed that major  
300 bacteria were commonly detected among all extraction protocols, with only slightly more  
301 uniquely detected microbiota using ZymoBIOMICS.

302

303 **Alpha and beta diversity**

304 Significantly higher Species richness ( $\alpha_2$ -breakaway) was observed from the  
305 ZymoBIOMICS ( $56.1 \pm 19.4$ ) protocol compared to that of PowerFecalPro ( $43.2 \pm 32.9$ ,  $p =$   
306  $0.025$ ), QIAampMini ( $54.9 \pm 29.8$ , not significant), and IndiSpin ( $63.6 \pm 38.3$ , not significant)  
307 using Dunn's test with Benjamini-Hochberg-adjustment (Fig. 3). Similarly, Faith's Phylogenetic  
308 Diversity was observed to be higher with the ZymoBIOMICS protocol ( $6.6 \pm 2.2$ ), compared to  
309 PowerFecalPro ( $4.5 \pm 1.9$ ,  $p = 0.012$ ), QIAampMini ( $5.0 \pm 1.8$ , not significant), and IndiSpin  
310 ( $5.4 \pm 1.7$ , not significant) using Dunn's test with Benjamini-Hochberg-adjustment (Fig. 3). The  
311 use of IndiSpin also resulted significantly higher alpha diversity than that of PowerFecalPro in an  
312 analysis of Species richness ( $p = 0.042$ , Dunn's test with Benjamini-Hochberg-adjustment). Non-  
313 phylogenetic alpha diversity metrics such as Observed OTUs, Shannon's diversity index, and  
314 Pielou's Evenness did not show differences among the four methods.

315 ZymoBIOMICS was able to significantly increase access to several taxonomic groups  
316 compared to the other DNA extraction methods. Additionally, as shown in Table 4,  
317 ZymoBIOMICS did capture a different microbial composition compared to other DNA  
318 extraction methods in the index of Unweighted UniFrac distances (PowerFecalPro:  $q = 0.002$ ;  
319 QIAampMini:  $q = 0.002$ ; and IndiSpin:  $q = 0.002$ ) and in Jaccard distances (QIAampMini:  $q =$   
320  $0.018$  and IndiSpin:  $q = 0.033$ ).

321

322 **Differential accessibility of microbiota by DNA extraction protocol**

323 LEfSe analysis identified taxonomic groups, defined with an LDA score of 2 or higher,  
324 for differential accessibility by extraction kit: 23 in ZymoBIOMICS, 0 in PowerFecalPro, 3 in  
325 QIAampMini, and 3 in IndiSpin (Fig. 4A). The following taxa were found to be highly



326 accessible (LDA score > 3) with the use of the ZymoBIOMICS kit: Phylum *Proteobacteria*,  
327 Class *Gammaproteobacteria*, Order *Betaproteobacteriales*, Family *Bacillaceae*, and Genus  
328 *Anoxybacillus*. Whereas the Order *Streptomycetales* was highly enriched with the use of the  
329 QIAampMini (LDA score > 3). As shown in the cladogram (Fig. 4B), despite the detection of a  
330 potential kit contaminant (*Meiothermus sp.* a member of the Phylum *Deinococcus-Thermus*),  
331 ZymoBIOMICS was able to increase the accessibility to additional microbiota compared to the  
332 other extraction protocols.

333

### 334 **Microbial community type and HPV16**

335 DMM detected two cervical microbial community types across all four DNA extraction  
336 protocols. Community type I was composed of the following: *Gardnerella sp.* (ZymoBIOMICS:  
337 17.1%; PowerFecalPro: 20%; QIAampMini: 23%; IndiSpin: 20%), *Lactobacillus iners*  
338 (ZymoBIOMICS: 6.3%; PowerFecalPro: 5%; QIAampMini: 6%; IndiSpin: 5%), *Atopobium*  
339 *vaginae* (10) (ZymoBIOMICS: 3.5%; PowerFecalPro: 3%; QIAampMini: 4%; IndiSpin: 5%),  
340 *Clamidia trachomatis* (ZymoBIOMICS: 1.9%; PowerFecalPro: 2%; QIAampMini: 3%;  
341 IndiSpin: 2%), *Shuttleworthia sp.* (ZymoBIOMICS: 1.8%; PowerFecalPro: 2%; QIAampMini:  
342 2%; IndiSpin: 2%). Some members of *Shuttleworthia* are considered to be bacterial  
343 vaginosis-associated bacterium (BVAB) (65), further investigation is required to determine if  
344 this OTU is indeed a BVAB. We determined this community type “high diversity type”.  
345 Community type II was is dominated by *Lactobacillus iners* at 88%, 85%, 83%, and 85%  
346 respectively for ZymoBIOMICS, PowerFecalPro, QIAampMini, and IndiSpin.

347 The relationship between HPV16 infection and community type was observed to be  
348 significantly associated with community type I (HPV16 positive patients [n = 9], HPV16

349 negative patients [n = 1]) and not community type II (HPV16 positive patients [n = 1], HPV16  
350 negative patients [n = 9], p = 0.001, Fisher's exact test) regardless of the DNA extraction kit used.  
351 In support of this result, analysis of differentially abundant microbiota using  $q_2$ -allex  
352 (Benjamini-Hochberg corrected p value of Wilcoxon test: p < 0.001, standardized distributional  
353 effect size: -1.2) revealed that *Lactobacillus iners* were differentially enriched in the cervical  
354 environment without HPV16. LEfSe analysis also detected that genus *Lactobacillus* were  
355 enriched in the cervical environment without HPV16 (p < 0.001, LDA score: -5.38). No  
356 significant differences were observed in the relationship between community type and HPV18 (p  
357 = 0.474, Fisher's exact test), HR-HPV (p = 0.474, Fisher's exact test), results of cervical biopsy  
358 (p = 0.554, Fisher's exact test), and race (African Americans vs not-African Americans: p = 1;  
359 Caucasian vs not-Caucasian: p = 0.656; Hispanic vs not-Hispanic: p = 0.350, Fisher's exact test).

360 **Discussion**

361 In this study, we evaluated the utility of LBC specimens for the collection and storage of cervical  
362 samples for microbiome surveys based on the 16S rRNA marker gene. We simultaneously  
363 compared the efficacy of several commonly used DNA extraction protocols on these samples in  
364 an effort to develop a standard operating procedure/protocol (SOP) for such work. We've also  
365 been able to show that there are two cervical microbial community types, which are associated  
366 with the dominance or non-dominance of *Lactobacillus iners*. Both community types were  
367 detected regardless of the DNA extraction protocol used.

368 This study evaluated the composition of microbiota across all DNA extraction methods.  
369 These findings document the importance of selecting DNA extraction methods in cervical  
370 microbiome studies from the LBC samples. All kits were commensurate in their ability to  
371 capture the microbial composition of each patient and the two observed cervical microbial  
372 community state types: making all of these protocols viable for discovering broad patterns of  
373 microbial diversity. However, we did observe that the ZymoBIOMICS protocol was better able  
374 to access additional cervical microbiota (Fig. 2B, 4A & B). Coincidentally, we detected potential  
375 DNA contamination only with the ZymoBIOMICS kit. The number of OTUs prior to rarefying  
376 revealed that the ZymoBIOMICS protocol detected more gram-negative OTUs than the  
377 PowerFecalPro (Table 3 & Fig. 2B). In particular, LEfSe analysis has shown that phylum  
378 *Proteobacteria* can be better detected with the ZymoBIOMICS kit (Fig. 4). Although rarefying  
379 microbiome data can be problematic (66), it can still provide robust and interpretable results for  
380 diversity analysis (67), we were able to observe commensurate findings with non-rarefying  
381 approaches such as  $q_2$ -breakaway (50),  $q_2$ -deicode (51), and LEfSe (48). Beta-diversity  
382 analysis via Unweighted UniFrac also revealed that ZymoBIOMICS was significantly different

383 from all other kits. There were no differences in non-phylogenetic indices of alpha diversity with  
384 rarefying approaches. These findings lead us to surmise that phylogenetic indices may be more  
385 sensitive than the non-phylogenetic indices.

386 Although we hypothesized that the detection of difficult-to-lyse-bacteria (*e.g.* gram-  
387 positive bacteria) would vary by kit, we observed no significant differences (Table 3). As shown  
388 in Table 3, the number of reads of gram-positive and gram-negative bacteria also showed that  
389 there was no difference in the four kits. This is likely due to several modifications made to the  
390 extraction protocol as outlined in Table 1. That is, we added bead beating and mutanolysin to the  
391 QIAampMini protocol (68). We also modified the beating time of the ZymoBIOMICS kit down  
392 to 2 minutes from 10 minutes (the latter being recommended by the manufacturer) to minimize  
393 DNA shearing. We may use the extracted DNA from ZymoBIOMICS for long-read amplicon  
394 sequencing platforms such as PacBio (Pacific Biosciences of California, Inc) (69) or MinION  
395 (Oxford Nanopore Technologies) (70) (71). Excessive shearing can render these samples  
396 unusable for long-read sequencing. It is quite possible that we could have observed even more  
397 diversity with the ZymoBIOMICS kit for our amplicon survey if we conducted bead-beating for  
398 the full 10 minutes.

399 Community typing and detection of the differentially abundant microbiota revealed that  
400 *Lactobacillus iners* were more abundant in the cervical ecosystem without HPV16. These  
401 findings are congruent with those of Lee *et al.* (1) and Audirac-Chalifour *et al.* (72). Lee *et al.*  
402 reported that *Lactobacillus iners* were decreased in women with HPV positive (1). Also, the  
403 result that the proportion of *Lactobacillus iners* was higher in HPV-negative women compared to  
404 HPV-positive women (relative abundance 14.9% vs 2.1%) was reported by Audirac-Chalifour *et*  
405 *al* (72). Similarly, Tuominen *et al.* (18) reported that *Lactobacillus iners* were enriched in HPV

406 negative samples (relative abundance: 47.7%) compared to HPV positive samples (relative  
407 abundance: 18.6%, p value = 0.07) in the study of HPV positive-pregnant women (HPV16  
408 positive rate: 15%). As established by the seminal study of Ranjeva *et al.* (73), a statistical model  
409 revealed that colonization of specific HPV type including multi HPV type infection depends on  
410 host-risk factors such as sexual behavior, race and ethnicity, and smoking. It is unclear whether  
411 the association between the cervical microbiome, host-specific traits, persistent infection of  
412 specific HPV types, such as HPV16, can be generalized and requires further investigation.

413 We focused on LBC samples as this is the recommended method of storage for cervical  
414 cytology (74). Here, we confirmed that LBC samples can be used for microbial community  
415 surveys by simply using the remaining LBC solution post HPV testing or cervical cytology. We  
416 used a sample volume of 200 or 300  $\mu$ L ThinPrep solution in this study. HPV genotyping test  
417 using Linear Array HPV Genotyping Test (Roche Diagnostics) stably detects  $\beta$ -globin with a  
418 base length of 268 bp as a positive control. Therefore, using a similar sample volume as HPV  
419 genotyping (250  $\mu$ L), it was expected that V4 (250 bp), which is near the base length of  $\beta$ -globin,  
420 would be PCR amplified. It has been pointed out by Ling *et al.* (75) that the cervical  
421 environment is of low microbial biomass. To control reagent DNA contamination and estimate  
422 the sample volume, DNA quantification by qPCR before sequencing is recommended (76). Mitra  
423 *et al* determined a sample volume of 500  $\mu$ L for ThinPrep by qPCR in the microbiome study  
424 comparing sampling methods using cytobrush or swab from cervix (19). The average storage  
425 period from sample collection via LBC to DNA extraction was about two years in this study.  
426 Kim *et al.* reported that DNA from cervix stored in ThinPrep at room temperature or  $-80^{\circ}$ C was  
427 stable for at least one year (77). Meanwhile, Castle *et al.* reported that  $\beta$ -globin DNA fragments  
428 of 268 bases or more were detected by PCR in 90 % (27 of 30 samples) of ThinPrep samples

429 stored for eight years at an uncontrolled ambient temperatures followed by a controlled ambient  
430 environment (10–26.7°C) (78). Low-temperature storage may allow the analysis of the short  
431 DNA fragments of the V4 region after even long-term storage, although further research is  
432 needed to confirm the optimal storage period in cervical microbiome studies using ThinPrep.  
433 SurePath LBC specimens are as widely used as ThinPrep, but the presence of formaldehyde  
434 within the SurePath preservation solution raises concerns about accessing enough DNA for  
435 analysis as compared to ThinPrep, which contains methanol (79) (80). It should also be noted  
436 that other storage solutions, *i.e.* those using guanidine thiocyanate have been reported for  
437 microbiome surveys of the cervix (81) and feces (82). A weakness of the current study is that we  
438 did not examine the reproducibility of our results as each sample was extracted using each kit  
439 once. However, the use of actual patient samples rather than mock samples is a strength of our  
440 approach.

441 In conclusion, regardless of the extraction protocol used, all kits provided equivalent  
442 accessibility to the cervical microbiome. All kits shared the ability to access 31 of 41 families  
443 and 45 of 57 genera (Fig. 2), approximately 90% of bacteria were gram-positive and 10% were  
444 gram-negative. Observed differences in microbial composition were due to the significant  
445 influence of the individual patient and not the extraction protocol. However, ZymoBIOMICS  
446 was observed to increase the accessibility of DNA from a greater range of microbiota compared  
447 to the other kits, in that the greatest number of significantly enriched taxa were identified (Fig. 3).  
448 This was not because of higher DNA yield nor ability to detect more gram-positive bacteria.  
449 Selection and characterization of an appropriate DNA extraction methods, for providing accurate  
450 census of cervical microbiota, and the human microbiome in general are important (23) (24) (25)  
451 (68) (77) (78). We have shown that the ability to characterize cervical microbiota from LBC

452 specimens is robust, even after prolonged storage. Our data also suggest that it is possible to  
453 reliably assess the relationship between HPV and the cervical microbiome, also supported by  
454 Kim *et al.* (77) and Castle *et al.* (78). Even though we found all four extraction kits to be  
455 commensurate in their ability to broadly characterize the CM, this study lends support to the  
456 view that the selection of a DNA extraction kit depends on the questions asked of the data, and  
457 should be taken into account for any cervicovaginal microbiome and HPV research that  
458 leverages LBC specimens for use in clinical practice (15) (83).

459

#### 460 **Acknowledgments**

461 We thank Togo Picture Gallery (<http://togotv.dbcls.jp/pics.html>) for stock images shown in Fig.  
462 1.

463 This work was supported by the National Institutes of Health (R01CA143130, USA), Drs.  
464 Mae and Anderson Nettleship Endowed Chair of Oncologic Pathology (31005156, USA), and  
465 the Arkansas Biosciences Institute (the major component of the Tobacco Settlement Proceeds  
466 Act of 2000, G1-52249-01, USA).

467 M.N. designed and supervised this project. T.S. and M.S.R. conducted bioinformatics  
468 analysis and wrote paper. T.S., H.C., and M.N. created the protocol of DNA extraction. M.N.,  
469 H.C., S.O., W.G., and T.S. provided important feedback. Samples in the clinical trial were  
470 collected by W.G. and his associates. DNA extraction was conducted by T.S. Sequencing of 16S  
471 RNA gene was conducted by S.O.

472 M.N. is one of the inventors named in the patents and patent applications for the HPV  
473 therapeutic vaccine PepCan. The remaining authors declare no conflicts of interest.

474 **References**

- 475 1. Lee JE, Lee S, Lee H, Song YM, Lee K, Han MJ, Sung J, Ko G. 2013. Association of the  
476 vaginal microbiota with human papillomavirus infection in a Korean twin cohort. *PLoS*  
477 *One* 8:e63514.
- 478 2. Huang X, Li C, Li F, Zhao J, Wan X, Wang K. 2018. Cervicovaginal microbiota composition  
479 correlates with the acquisition of high-risk human papillomavirus types. *Int J Cancer*  
480 143:621-634.
- 481 3. Zhou Y, Wang L, Pei F, Ji M, Zhang F, Sun Y, Zhao Q, Hong Y, Wang X, Tian J, Wang Y.  
482 2019. Patients With LR-HPV Infection Have a Distinct Vaginal Microbiota in Comparison  
483 With Healthy Controls. *Front Cell Infect Microbiol* 9:294.
- 484 4. Onywera H, Williamson AL, Mbulawa ZZA, Coetzee D, Meiring TL. 2019. The cervical  
485 microbiota in reproductive-age South African women with and without human  
486 papillomavirus infection. *Papillomavirus Res* 7:154-163.
- 487 5. Brotman RM, Shardell MD, Gajer P, Tracy JK, Zenilman JM, Ravel J, Gravitt PE. 2014.  
488 Interplay between the temporal dynamics of the vaginal microbiota and human  
489 papillomavirus detection. *J Infect Dis* 210:1723-33.
- 490 6. Godoy-Vitorino F, Romaguera J, Zhao C, Vargas-Robles D, Ortiz-Morales G, Vazquez-  
491 Sanchez F, Sanchez-Vazquez M, de la Garza-Casillas M, Martinez-Ferrer M, White JR,  
492 Bittinger K, Dominguez-Bello MG, Blaser MJ. 2018. Cervicovaginal Fungi and Bacteria  
493 Associated With Cervical Intraepithelial Neoplasia and High-Risk Human Papillomavirus  
494 Infections in a Hispanic Population. *Front Microbiol* 9:2533.
- 495 7. łaniewski P, Barnes D, Goulder A, Cui H, Roe DJ, Chase DM, Herbst-Kralovetz MM. 2018.  
496 Linking cervicovaginal immune signatures, HPV and microbiota composition in cervical  
497 carcinogenesis in non-Hispanic and Hispanic women, *Sci Rep*, vol 8.
- 498 8. Mitra A, MacIntyre DA, Lee YS, Smith A, Marchesi JR, Lehne B, Bhatia R, Lyons D,  
499 Paraskevaidis E, Li JV, Holmes E, Nicholson JK, Bennett PR, Kyrgiou M. 2015. Cervical  
500 intraepithelial neoplasia disease progression is associated with increased vaginal  
501 microbiome diversity. *Sci Rep* 5:16865.
- 502 9. Piyathilake CJ, Ollberding NJ, Kumar R, Macaluso M, Alvarez RD, Morrow CD. 2016.  
503 Cervical Microbiota Associated with Higher Grade Cervical Intraepithelial Neoplasia in  
504 Women Infected with High-Risk Human Papillomaviruses. *Cancer Prev Res (Phila)* 9:357-  
505 66.
- 506 10. Oh HY, Kim BS, Seo SS, Kong JS, Lee JK, Park SY, Hong KM, Kim HK, Kim MK. 2015. The  
507 association of uterine cervical microbiota with an increased risk for cervical  
508 intraepithelial neoplasia in Korea. *Clin Microbiol Infect* 21:674 e1-9.
- 509 11. De Seta F, Campisciano G, Zanotta N, Ricci G, Comar M. 2019. The Vaginal Community  
510 State Types Microbiome-Immune Network as Key Factor for Bacterial Vaginosis and  
511 Aerobic Vaginitis. *Front Microbiol* 10:2451.
- 512 12. Oliver A, LaMere B, Weihe C, Wandro S, Lindsay KL, Wadhwa PD, Mills DA, Pride D, Fiehn  
513 O, Northen T, de Raad M, Li H, Martiny JBH, Lynch S, Whiteson K. 2019. Cervicovaginal  
514 microbiome composition drives metabolic profiles in healthy pregnancy. *bioRxiv*  
515 <https://doi.org/10.1101/840520>.



- 516 13. Human Microbiome Project Consortium. 2012. Structure, function and diversity of the  
517 healthy human microbiome. *Nature* 486:207-14.
- 518 14. Bik EM, Bird SW, Bustamante JP, Leon LE, Nieto PA, Addae K, Alegria-Mera V, Bravo C,  
519 Bravo D, Cardenas JP, Carson GA, Caughey A, Covarrubias PC, Perez-Donoso J, Gass G,  
520 Gupta SL, Harman K, Hongo DMB, Jimenez JC, Kraal L, Melis-Arcos F, Morales EH,  
521 Morton A, Navas CF, Nunez H, Olivares E, Ordenes-Aenishanslins N, Ossandon FJ, Phan R,  
522 Pino R, Soto-Liebe K, Varas I, Vera-Wolf P, Walton NA, Almonacid DE, Goddard AD,  
523 Ugalde JA, Zneimer S, Richman J, Apte ZS. 2019. A novel sequencing-based vaginal  
524 health assay combining self-sampling, HPV detection and genotyping, STI detection, and  
525 vaginal microbiome analysis. *PLoS One* 14:e0215945.
- 526 15. Berman HL, McLaren MR, Callahan BJ. 2019. Understanding and Interpreting Community  
527 Sequencing Measurements of the Vaginal Microbiome. *BJOG* doi:10.1111/1471-  
528 0528.15978.
- 529 16. Ravel J, Gajer P, Abdo Z, Schneider GM, Koenig SS, McCulle SL, Karlebach S, Gorle R,  
530 Russell J, Tacket CO, Brotman RM, Davis CC, Ault K, Peralta L, Forney LJ. 2011. Vaginal  
531 microbiome of reproductive-age women. *Proc Natl Acad Sci U S A* 108 Suppl 1:4680-7.
- 532 17. Fettweis JM, Serrano MG, Brooks JP, Edwards DJ, Girerd PH, Parikh HI, Huang B, Arodz TJ,  
533 Edupuganti L, Glascock AL, Xu J, Jimenez NR, Vivadelli SC, Fong SS, Sheth NU, Jean S, Lee  
534 V, Bokhari YA, Lara AM, Mistry SD, Duckworth RA, 3rd, Bradley SP, Koparde VN, Orenda  
535 XV, Milton SH, Rozycki SK, Matveyev AV, Wright ML, Huzurbazar SV, Jackson EM,  
536 Smirnova E, Kurlach J, Tsai YC, Dickinson MR, Brooks JL, Drake JI, Chaffin DO, Sexton AL,  
537 Gravett MG, Rubens CE, Wijesooriya NR, Hendricks-Munoz KD, Jefferson KK, Strauss JF,  
538 3rd, Buck GA. 2019. The vaginal microbiome and preterm birth. *Nat Med* 25:1012-1021.
- 539 18. Tuominen H, Rautava S, Syrjanen S, Collado MC, Rautava J. 2018. HPV infection and  
540 bacterial microbiota in the placenta, uterine cervix and oral mucosa. *Sci Rep* 8:9787.
- 541 19. Mitra A, MacIntyre DA, Mahajan V, Lee YS, Smith A, Marchesi JR, Lyons D, Bennett PR,  
542 Kyrgiou M. 2017. Comparison of vaginal microbiota sampling techniques: cytobrush  
543 versus swab. *Sci Rep* 7:9802.
- 544 20. Bentz JS. 2005. Liquid-based cytology for cervical cancer screening. *Expert Rev Mol*  
545 *Diagn* 5:857-71.
- 546 21. Gibb RK, Martens MG. 2011. The impact of liquid-based cytology in decreasing the  
547 incidence of cervical cancer. *Rev Obstet Gynecol* 4:S2-S11.
- 548 22. Donders GG, Depuydt CE, Bogers JP, Vereecken AJ. 2013. Association of *Trichomonas*  
549 *vaginalis* and cytological abnormalities of the cervix in low risk women. *PLoS One*  
550 8:e86266.
- 551 23. Costea PI, Zeller G, Sunagawa S, Pelletier E, Alberti A, Levenez F, Tramontano M,  
552 Driessen M, Hercog R, Jung FE, Kultima JR, Hayward MR, Coelho LP, Allen-Vercoe E,  
553 Bertrand L, Blaut M, Brown JRM, Carton T, Cools-Portier S, Daigneault M, Derrien M,  
554 Druesne A, de Vos WM, Finlay BB, Flint HJ, Guarner F, Hattori M, Heilig H, Luna RA, van  
555 Hylckama Vlieg J, Junick J, Klymiuk I, Langella P, Le Chatelier E, Mai V, Manichanh C,  
556 Martin JC, Mery C, Morita H, O'Toole PW, Orvain C, Patil KR, Penders J, Persson S, Pons  
557 N, Popova M, Salonen A, Saulnier D, Scott KP, Singh B, et al. 2017. Towards standards for  
558 human fecal sample processing in metagenomic studies. *Nat Biotechnol* 35:1069-1076.

- 559 24. Stinson LF, Keelan JA, Payne MS. 2018. Comparison of Meconium DNA Extraction  
560 Methods for Use in Microbiome Studies. *Front Microbiol* 9:270.
- 561 25. Teng F, Darveekaran Nair SS, Zhu P, Li S, Huang S, Li X, Xu J, Yang F. 2018. Impact of DNA  
562 extraction method and targeted 16S-rRNA hypervariable region on oral microbiota  
563 profiling. *Sci Rep* 8:16321.
- 564 26. Ravilla R, Coleman HN, Chow CE, Chan L, Fuhrman BJ, Greenfield WW, Robeson MS,  
565 Iverson K, Spencer H, 3rd, Nakagawa M. 2019. Cervical Microbiome and Response to a  
566 Human Papillomavirus Therapeutic Vaccine for Treating High-Grade Cervical Squamous  
567 Intraepithelial Lesion. *Integr Cancer Ther* 18:1534735419893063.
- 568 27. Virtanen S, Kalliala I, Nieminen P, Salonen A. 2017. Comparative analysis of vaginal  
569 microbiota sampling using 16S rRNA gene analysis. *PLoS One* 12:e0181477.
- 570 28. Kim D, Hofstaedter CE, Zhao C, Mattei L, Tanes C, Clarke E, Lauder A, Sherrill-Mix S,  
571 Chehoud C, Kelsen J, Conrad M, Collman RG, Baldassano R, Bushman FD, Bittinger K.  
572 2017. Optimizing methods and dodging pitfalls in microbiome research. *Microbiome*  
573 5:52.
- 574 29. Thompson LR, Sanders JG, McDonald D, Amir A, Ladau J, Locey KJ, Prill RJ, Tripathi A,  
575 Gibbons SM, Ackermann G, Navas-Molina JA, Janssen S, Kopylova E, Vazquez-Baeza Y,  
576 Gonzalez A, Morton JT, Mirarab S, Zech Xu Z, Jiang L, Haroon MF, Kanbar J, Zhu Q, Jin  
577 Song S, Kosciolk T, Bokulich NA, Lefler J, Brislawn CJ, Humphrey G, Owens SM,  
578 Hampton-Marcell J, Berg-Lyons D, McKenzie V, Fierer N, Fuhrman JA, Clauset A, Stevens  
579 RL, Shade A, Pollard KS, Goodwin KD, Jansson JK, Gilbert JA, Knight R, Earth Microbiome  
580 Project C. 2017. A communal catalogue reveals Earth's multiscale microbial diversity.  
581 *Nature* 551:457-463.
- 582 30. Apprill A, McNally S, Parsons R, Weber L. 2015. Minor revision to V4 region SSU rRNA  
583 806R gene primer greatly increases detection of SAR11 bacterioplankton. *Aquat Microb  
584 Ecol* 75:129-137.
- 585 31. Parada AE, Needham DM, Fuhrman JA. 2016. Every base matters: assessing small  
586 subunit rRNA primers for marine microbiomes with mock communities, time series and  
587 global field samples. *Environ Microbiol* 18:1403-14.
- 588 32. Walters W, Hyde ER, Berg-Lyons D, Ackermann G, Humphrey G, Parada A, Gilbert JA,  
589 Jansson JK, Caporaso JG, Fuhrman JA, Apprill A, Knight R. 2016. Improved Bacterial 16S  
590 rRNA Gene (V4 and V4-5) and Fungal Internal Transcribed Spacer Marker Gene Primers  
591 for Microbial Community Surveys. *mSystems* 1.
- 592 33. Bolyen E, Rideout JR, Dillon MR, Bokulich NA, Abnet CC, Al-Ghalith GA, Alexander H, Alm  
593 EJ, Arumugam M, Asnicar F, Bai Y, Bisanz JE, Bittinger K, Brejnrod A, Brislawn CJ, Brown  
594 CT, Callahan BJ, Caraballo-Rodriguez AM, Chase J, Cope EK, Da Silva R, Diener C,  
595 Dorrestein PC, Douglas GM, Durall DM, Duvallet C, Edwardson CF, Ernst M, Estaki M,  
596 Fouquier J, Gauglitz JM, Gibbons SM, Gibson DL, Gonzalez A, Gorlick K, Guo J, Hillmann B,  
597 Holmes S, Holste H, Huttenhower C, Huttley GA, Jansson S, Jarmusch AK, Jiang L, Kaehler  
598 BD, Kang KB, Keefe CR, Keim P, Kelley ST, Knights D, et al. 2019. Reproducible,  
599 interactive, scalable and extensible microbiome data science using QIIME 2. *Nat  
600 Biotechnol* 37:852-857.
- 601 34. Callahan BJ, McMurdie PJ, Holmes SP. 2017. Exact sequence variants should replace  
602 operational taxonomic units in marker-gene data analysis. *ISME J* 11:2639-2643.

- 603 35. Callahan BJ, McMurdie PJ, Rosen MJ, Han AW, Johnson AJ, Holmes SP. 2016. DADA2:  
604 High-resolution sample inference from Illumina amplicon data. *Nat Methods* 13:581-3.
- 605 36. Bokulich NA, Kaehler BD, Rideout JR, Dillon M, Bolyen E, Knight R, Huttley GA, Gregory  
606 Caporaso J. 2018. Optimizing taxonomic classification of marker-gene amplicon  
607 sequences with QIIME 2's q2-feature-classifier plugin. *Microbiome* 6:90.
- 608 37. Werner JJ, Koren O, Hugenholtz P, DeSantis TZ, Walters WA, Caporaso JG, Angenent LT,  
609 Knight R, Ley RE. 2012. Impact of training sets on classification of high-throughput  
610 bacterial 16s rRNA gene surveys. *ISME J* 6:94-103.
- 611 38. Quast C, Pruesse E, Yilmaz P, Gerken J, Schweer T, Yarza P, Peplies J, Glockner FO. 2013.  
612 The SILVA ribosomal RNA gene database project: improved data processing and web-  
613 based tools. *Nucleic Acids Res* 41:D590-6.
- 614 39. Katoh K, Standley DM. 2013. MAFFT multiple sequence alignment software version 7:  
615 improvements in performance and usability. *Mol Biol Evol* 30:772-80.
- 616 40. Nguyen LT, Schmidt HA, von Haeseler A, Minh BQ. 2015. IQ-TREE: a fast and effective  
617 stochastic algorithm for estimating maximum-likelihood phylogenies. *Mol Biol Evol*  
618 32:268-74.
- 619 41. Kalyaanamoorthy S, Minh BQ, Wong TKF, von Haeseler A, Jermiin LS. 2017.  
620 ModelFinder: fast model selection for accurate phylogenetic estimates. *Nat Methods*  
621 14:587-589.
- 622 42. Bokulich NA, Subramanian S, Faith JJ, Gevers D, Gordon JI, Knight R, Mills DA, Caporaso  
623 JG. 2013. Quality-filtering vastly improves diversity estimates from Illumina amplicon  
624 sequencing. *Nat Methods* 10:57-9.
- 625 43. McMurdie PJ, Holmes S. 2013. phyloseq: an R package for reproducible interactive  
626 analysis and graphics of microbiome census data. *PLoS One* 8:e61217.
- 627 44. Bisanz JE. 2018. qiime2R: Importing QIIME2 artifacts and associated data into R sessions.  
628 <https://github.com/jbisanz/qiime2R>.
- 629 45. Lahti L, Shetty S. 2012-2019. microbiome R package. <http://microbiome.github.io>.
- 630 46. Anderson MJ. 2001. A new method for non-parametric multivariate analysis of variance.  
631 *Austral Ecol* 26:32-46.
- 632 47. Oksanen J, Blanchet FG, Friendly M, Kindt R, Legendre P, McGlenn D, Minchin PR, O'Hara  
633 RB, Simpson GL, Solymos P, Stevens MHH, Szoecs E, Wagner H. 2019. vegan: Community  
634 Ecology Package. 2018. R package version 2.5-3. [https://CRAN.R-](https://CRAN.R-project.org/package=vegan)  
635 [project.org/package=vegan](https://CRAN.R-project.org/package=vegan).
- 636 48. Segata N, Izard J, Waldron L, Gevers D, Miropolsky L, Garrett WS, Huttenhower C. 2011.  
637 Metagenomic biomarker discovery and explanation. *Genome Biol* 12:R60.
- 638 49. Bardou P, Mariette J, Escudie F, Djemiel C, Klopp C. 2014. jvenn: an interactive Venn  
639 diagram viewer. *BMC Bioinformatics* 15:293.
- 640 50. Willis A, Bunge J. 2015. Estimating diversity via frequency ratios. *Biometrics* 71:1042-9.
- 641 51. Martino C, Morton JT, Marotz CA, Thompson LR, Tripathi A, Knight R, Zengler K. 2019. A  
642 Novel Sparse Compositional Technique Reveals Microbial Perturbations. *mSystems* 4.
- 643 52. Gao W, Weng J, Gao Y, Chen X. 2013. Comparison of the vaginal microbiota diversity of  
644 women with and without human papillomavirus infection: a cross-sectional study. *BMC*  
645 *Infect Dis* 13:271.

- 646 53. Montealegre JR, Peckham-Gregory EC, Marquez-Do D, Dillon L, Guillaud M, Adler-  
647 Storthz K, Follen M, Scheurer ME. 2018. Racial/ethnic differences in HPV 16/18  
648 genotypes and integration status among women with a history of cytological  
649 abnormalities. *Gynecol Oncol* 148:357-362.
- 650 54. Xi LF, Kiviat NB, Hildesheim A, Galloway DA, Wheeler CM, Ho J, Koutsky LA. 2006.  
651 Human papillomavirus type 16 and 18 variants: race-related distribution and persistence.  
652 *J Natl Cancer Inst* 98:1045-52.
- 653 55. Morgan M. 2019. DirichletMultinomial: Dirichlet-Multinomial Mixture Model Machine  
654 Learning for Microbiome Data.  
655 <http://bioconductor.org/packages/release/bioc/html/DirichletMultinomial.html>.
- 656 56. Holmes I, Harris K, Quince C. 2012. Dirichlet multinomial mixtures: generative models  
657 for microbial metagenomics. *PLoS One* 7:e30126.
- 658 57. DiGiulio DB, Callahan BJ, McMurdie PJ, Costello EK, Lyell DJ, Robaczewska A, Sun CL,  
659 Goltsman DS, Wong RJ, Shaw G, Stevenson DK, Holmes SP, Relman DA. 2015. Temporal  
660 and spatial variation of the human microbiota during pregnancy. *Proc Natl Acad Sci U S*  
661 *A* 112:11060-5.
- 662 58. Fernandes AD, Macklaim JM, Linn TG, Reid G, Gloor GB. 2013. ANOVA-like differential  
663 expression (ALDEx) analysis for mixed population RNA-Seq. *PLoS One* 8:e67019.
- 664 59. Dinno A. 2017. dunn.test: Dunn's Test of Multiple Comparisons Using Rank Sums.  
665 <https://CRAN.R-project.org/package=dunn.test>.
- 666 60. Yilmaz P, Kottmann R, Field D, Knight R, Cole JR, Amaral-Zettler L, Gilbert JA, Karsch-  
667 Mizrahi I, Johnston A, Cochrane G, Vaughan R, Hunter C, Park J, Morrison N, Rocca-  
668 Serra P, Sterk P, Arumugam M, Bailey M, Baumgartner L, Birren BW, Blaser MJ, Bonazzi  
669 V, Booth T, Bork P, Bushman FD, Buttigieg PL, Chain PS, Charlson E, Costello EK, Huot-  
670 Creasy H, Dawyndt P, DeSantis T, Fierer N, Fuhrman JA, Gallery RE, Gevers D, Gibbs RA,  
671 San Gil I, Gonzalez A, Gordon JI, Guralnick R, Hankeln W, Highlander S, Hugenholtz P,  
672 Jansson J, Kau AL, Kelley ST, Kennedy J, Knights D, Koren O, et al. 2011. Minimum  
673 information about a marker gene sequence (MIMARKS) and minimum information  
674 about any (x) sequence (MlxS) specifications. *Nat Biotechnol* 29:415-20.
- 675 61. Balle C, Lennard K, Dabee S, Barnabas SL, Jaumdally SZ, Gasper MA, Maseko V, Mbulawa  
676 ZZA, Williamson AL, Bekker LG, Lewis DA, Passmore JS, Jaspan HB. 2018. Endocervical  
677 and vaginal microbiota in South African adolescents with asymptomatic Chlamydia  
678 trachomatis infection. *Sci Rep* 8:11109.
- 679 62. Klein C, Gonzalez D, Samwel K, Kahesa C, Mwaiselage J, Aluthge N, Fernando S, West JT,  
680 Wood C, Angeletti PC. 2019. Relationship between the Cervical Microbiome, HIV Status,  
681 and Precancerous Lesions. *MBio* 10.
- 682 63. Glassing A, Dowd SE, Galandiuk S, Davis B, Chiodini RJ. 2016. Inherent bacterial DNA  
683 contamination of extraction and sequencing reagents may affect interpretation of  
684 microbiota in low bacterial biomass samples, *Gut Pathog*, vol 8.
- 685 64. Birse KD, Romas LM, Guthrie BL, Nilsson P, Bosire R, Kiarie J, Farquhar C, Broliden K,  
686 Burgener AD. 2017. Genital Injury Signatures and Microbiome Alterations Associated  
687 With Depot Medroxyprogesterone Acetate Usage and Intravaginal Drying Practices. *J*  
688 *Infect Dis* 215:590-598.

- 689 65. Lennard K, Dabee S, Barnabas SL, Havyarimana E, Blakney A, Jaumdally SZ, Botha G,  
690 Mkhize NN, Bekker LG, Lewis DA, Gray G, Mulder N, Passmore JS, Jaspán HB. 2018.  
691 Microbial Composition Predicts Genital Tract Inflammation and Persistent Bacterial  
692 Vaginosis in South African Adolescent Females. *Infect Immun* 86.
- 693 66. McMurdie PJ, Holmes S. 2014. Waste not, want not: why rarefying microbiome data is  
694 inadmissible. *PLoS Comput Biol* 10:e1003531.
- 695 67. Weiss S, Xu ZZ, Peddada S, Amir A, Bittinger K, Gonzalez A, Lozupone C, Zaneveld JR,  
696 Vazquez-Baeza Y, Birmingham A, Hyde ER, Knight R. 2017. Normalization and microbial  
697 differential abundance strategies depend upon data characteristics. *Microbiome* 5:27.
- 698 68. Yuan S, Cohen DB, Ravel J, Abdo Z, Forney LJ. 2012. Evaluation of methods for the  
699 extraction and purification of DNA from the human microbiome. *PLoS One* 7:e33865.
- 700 69. Callahan BJ, Wong J, Heiner C, Oh S, Theriot CM, Gulati AS, McGill SK, Dougherty MK.  
701 2019. High-throughput amplicon sequencing of the full-length 16S rRNA gene with  
702 single-nucleotide resolution. *Nucleic Acids Res* 47:e103.
- 703 70. Calus ST, Ijaz UZ, Pinto AJ. 2018. NanoAmpli-Seq: a workflow for amplicon sequencing  
704 for mixed microbial communities on the nanopore sequencing platform. *Gigascience* 7.
- 705 71. Wongsurawat T, Nakagawa M, Atiq O, Coleman HN, Jenjaroenpun P, Allred JI, Trammel  
706 A, Puengrang P, Ussery DW, Nookaew I. 2019. An assessment of Oxford Nanopore  
707 sequencing for human gut metagenome profiling: A pilot study of head and neck cancer  
708 patients. *J Microbiol Methods* 166:105739.
- 709 72. Audirac-Chalifour A, Torres-Poveda K, Bahena-Roman M, Tellez-Sosa J, Martinez-  
710 Barnette J, Cortina-Ceballos B, Lopez-Estrada G, Delgado-Romero K, Burguete-Garcia  
711 AI, Cantu D, Garcia-Carranca A, Madrid-Marina V. 2016. Cervical Microbiome and  
712 Cytokine Profile at Various Stages of Cervical Cancer: A Pilot Study. *PLoS One*  
713 11:e0153274.
- 714 73. Ranjeva SL, Mihaljevic JR, Joseph MB, Giuliano AR, Dwyer G. 2019. Untangling the  
715 dynamics of persistence and colonization in microbial communities. *ISME J*  
716 doi:10.1038/s41396-019-0488-7:1-13.
- 717 74. Linder J, Zahniser D. 1998. ThinPrep Papanicolaou testing to reduce false-negative  
718 cervical cytology. *Arch Pathol Lab Med* 122:139-44.
- 719 75. Ling Z, Liu X, Chen X, Zhu H, Nelson KE, Xia Y, Li L, Xiang C. 2011. Diversity of  
720 cervicovaginal microbiota associated with female lower genital tract infections. *Microb*  
721 *Ecol* 61:704-14.
- 722 76. Salter SJ, Cox MJ, Turek EM, Calus ST, Cookson WO, Moffatt MF, Turner P, Parkhill J,  
723 Loman NJ, Walker AW. 2014. Reagent and laboratory contamination can critically  
724 impact sequence-based microbiome analyses. *BMC Biol* 12:87.
- 725 77. Kim Y, Choi KR, Chae MJ, Shin BK, Kim HK, Kim A, Kim BH. 2013. Stability of DNA, RNA,  
726 cytomorphology, and immunoantigenicity in Residual ThinPrep Specimens. *APMIS*  
727 121:1064-72.
- 728 78. Castle PE, Solomon D, Hildesheim A, Herrero R, Concepcion Bratti M, Sherman ME,  
729 Cecilia Rodriguez A, Alfaro M, Hutchinson ML, Terence Dunn S, Kuypers J, Schiffman M.  
730 2003. Stability of archived liquid-based cervical cytologic specimens. *Cancer* 99:89-96.

- 731 79. Rebolj M, Rask J, van Ballegooijen M, Kirschner B, Rozemeijer K, Bonde J, Rygaard C,  
732 Lynge E. 2015. Cervical histology after routine ThinPrep or SurePath liquid-based  
733 cytology and computer-assisted reading in Denmark. *Br J Cancer* 113:1259-74.
- 734 80. Naeem RC, Goldstein DY, Einstein MH, Ramos Rivera G, Schlesinger K, Khader SN,  
735 Suhrland M, Fox AS. 2017. SurePath Specimens Versus ThinPrep Specimen Types on the  
736 COBAS 4800 Platform: High-Risk HPV Status and Cytology Correlation in an Ethnically  
737 Diverse Bronx Population. *Lab Med* 48:207-213.
- 738 81. Ritu W, Enqi W, Zheng S, Wang J, Ling Y, Wang Y. 2019. Evaluation of the Associations  
739 Between Cervical Microbiota and HPV Infection, Clearance, and Persistence in  
740 Cytologically Normal Women. *Cancer Prev Res (Phila)* 12:43-56.
- 741 82. Hosomi K, Ohno H, Murakami H, Natsume-Kitatani Y, Tanisawa K, Hirata S, Suzuki H,  
742 Nagatake T, Nishino T, Mizuguchi K, Miyachi M, Kunisawa J. 2017. Method for preparing  
743 DNA from feces in guanidine thiocyanate solution affects 16S rRNA-based profiling of  
744 human microbiota diversity. *Sci Rep* 7:4339.
- 745 83. Sarangi AN, Goel A, Aggarwal R. 2019. Methods for Studying Gut Microbiota: A Primer  
746 for Physicians. *J Clin Exp Hepatol* 9:62-73.
- 747 84. Silhavy TJ, Kahne D, Walker S. 2010. The bacterial cell envelope. *Cold Spring Harb*  
748 *Perspect Biol* 2:a000414.
- 749
- 750

**Table 1: Characteristics of four different DNA extraction protocols**

| Kit (Cat. No.)                        | Manufacturer       | Sample volume | Enzyme                   | Beads                | Beating             | DNA carrier | Others             |
|---------------------------------------|--------------------|---------------|--------------------------|----------------------|---------------------|-------------|--------------------|
| ZymoBIOMICS DNA Miniprep Kit (D4300)  | Zymo Research      | 300 $\mu$ L   | No                       | Ceramic <sup>a</sup> | 2 min <sup>b</sup>  | No          | <sup>c</sup>       |
| QIAamp PowerFecal Pro DNA Kit (51804) | Qiagen             | 300 $\mu$ L   | No                       | Ceramic <sup>d</sup> | 10 min <sup>b</sup> | No          | <sup>c</sup>       |
| QIAamp DNA Mini Kit (51304)           | Qiagen             | 200 $\mu$ L   | Mutanolysin <sup>e</sup> | No                   | No                  | No          | <sup>c, f, g</sup> |
| IndiSpin Pathogen Kit (SPS4104)       | Indical Bioscience | 300 $\mu$ L   | No                       | Ceramic <sup>h</sup> | 10 min <sup>b</sup> | Yes         | <sup>c, i</sup>    |

a: <https://www.zymoresearch.com/pages/microbial-isolation>. b: Disruptor Genie (USA Scientific, Inc.) was used under the maximum speed. c: Nuclease free water (85  $\mu$ L) as DNA elution buffer was used. d: PowerBead Pro Tubes (<https://www.qiagen.com/us/products/discovery-and-translational-research/lab-essentials/plastics/powerbead-tubes/#orderinginformation>). e: Instead of lysozyme or lysostaphin, mutanolysin was used as per Yuan *et al*, 2012 (68). f: DNA Purification from Blood or Body Fluids; Protocols for Bacteria; Isolation of genomic DNA from gram-positive bacteria in QIAamp DNA Mini and Blood Mini Handbook fifth edition was referenced. g: Heating at 56°C for 30 min and 95°C for 15 min was performed. h: Pathogen Lysis Tubes S (<https://www.qiagen.com/dk/shop/pcr/pathogen-lysis-tubes/>). i: Pretreatment B2 as per QIAamp cador Pathogen Mini Handbook.

**Table 2. Patients characteristics**

| Characteristics                 | Values     |
|---------------------------------|------------|
| Number of patients, n           | 20         |
| Total number of DNA extracts, n | 80         |
| Age, mean (SD)                  | 31.4 (5.0) |
| Race                            |            |
| African American, n (%)         | 3 (15)     |
| Caucasian, n (%)                | 10 (50)    |
| Hispanic, n (%)                 | 7 (35)     |
| Cervical biopsy                 |            |
| CIN2, n (%)                     | 8 (40)     |
| CIN3, n (%)                     | 10 (50)    |
| Benign, n (%)                   | 2 (10)     |
| HPV typing                      |            |
| HPV positive, n (%)             | 19 (95)    |
| HPV16 positive, n (%)           | 10 (50)    |
| HPV18 positive, n (%)           | 2 (10)     |
| HPV16 or 18 positives, n (%)    | 10 (50)    |
| HR-HPV positives, n (%)         | 18 (90)    |

SD: standard deviation. CIN: cervical intraepithelial neoplasia. HR-HPV: high-risk HPV (HPV16 18, 31, 33, 35, 39, 45, 51, 52, 56, 58, 59, and 68)



**Table 3. Reads and OTUs before rarefying assigned to all, gram-, and gram-negative bacteria per DNA extraction protocols**

| Parameters                     | Community                        | Methods | Values                       | Ratio of GP or GN | p value  |    |
|--------------------------------|----------------------------------|---------|------------------------------|-------------------|----------|----|
| Number of reads<br>(mean ± SD) | All                              | Zy      | 2,705,044 (135,252 ± 66,011) |                   | <i>a</i> |    |
|                                |                                  | Pro     | 2,312,207 (115,610 ± 68,201) |                   |          |    |
|                                |                                  | QIA     | 2,765,343 (138,267 ± 49,781) |                   |          |    |
|                                |                                  | IN      | 3,366,988 (168,349 ± 57,451) |                   |          |    |
|                                | GP                               | Zy      | 2,430,380 (121,519 ± 56,209) | 89.8%             | NS       |    |
|                                |                                  | Pro     | 2,116,458 (105,823 ± 57,590) | 91.5%             |          |    |
|                                |                                  | QIA     | 2,503,578 (125,179 ± 46,073) | 90.5%             |          |    |
|                                |                                  | IN      | 2,985,941 (149,297 ± 46,936) | 88.7%             |          |    |
|                                | GN                               | Zy      | 274,664 (13,733 ± 29,162)    | 10.2%             | NS       |    |
|                                |                                  | Pro     | 195,749 (9,788 ± 23,070)     | 8.5%              |          |    |
|                                |                                  | QIA     | 261,765 (13,088 ± 22,638)    | 9.5%              |          |    |
|                                |                                  | IN      | 381,047 (19,052 ± 33,038)    | 11.3%             |          |    |
|                                | Number of<br>OTUs (mean ±<br>SD) | All     | Zy                           | 825 (41.3 ± 16.8) |          | NS |
|                                |                                  |         | Pro                          | 621 (31.1 ± 19.4) |          |    |
|                                |                                  |         | QIA                          | 778 (38.9 ± 22.4) |          |    |
|                                |                                  |         | IN                           | 792 (39.6 ± 22.7) |          |    |
| GP                             |                                  | Zy      | 479 (24.0 ± 9.2)             | 58.1%             | NS       |    |
|                                |                                  | Pro     | 412 (20.6 ± 12.7)            | 66.3%             |          |    |
|                                |                                  | QIA     | 513 (25.7 ± 13.7)            | 65.9%             |          |    |
|                                |                                  | IN      | 531 (26.6 ± 14.9)            | 67.0%             |          |    |
| GN                             |                                  | Zy      | 346 (17.3 ± 9.8)             | 41.9%             | <i>b</i> |    |
|                                |                                  | Pro     | 209 (10.5 ± 10.3)            | 33.7%             |          |    |
|                                |                                  | QIA     | 265 (13.3 ± 9.2)             | 34.1%             |          |    |
|                                |                                  | IN      | 261 (13.1 ± 8.3)             | 33.0%             |          |    |

---

Community of gram-positive bacteria were defined as phylum *Actinobacteria* and *Firmicutes*, which are composed of thick peptidoglycan layers without outer membrane (84). Community of gram-negative bacteria was defined as a community of bacteria other than phylum *Actinobacteria* and *Firmicutes* in this study. a: I - P: 0.0199; I - Q: 0.1590; P - Q: 0.1436; I - Z: 0.1495; P - Z: 0.1712; and Q - Z: 0.4059. b: I - P: 0.2116; I - Q: 0.4837; P - Q: 0.1143; I - Z: 0.0938; P - Z: 0.0116; Q - Z: 0.1448. Dunn's test with Benjamini-Hochberg-adjustment were performed for comparison of the number of read and OTU by DNA extraction method. Zy: ZymoBIOMICS DNA Miniprep Kit, Pro: QIAamp PowerFecal Pro DNA Kit, QIA: QIAamp DNA Mini Kit, IN: IndiSpin Pathogen Kit. SD: standard deviation. All: all bacteria, GP: gram-positive bacteria, GN: gram-negative bacteria. NS: not significant.

**Table 4. Beta diversity among DNA extraction methods**

| Index                       | Protocol      | Protocols compared | p values | q values |
|-----------------------------|---------------|--------------------|----------|----------|
| Aitchison distance          | ZymoBIOMICS   | PowerFecalPro      | NS       | NS       |
|                             |               | QIAampMini         | NS       | NS       |
|                             |               | IndiSpin           | NS       | NS       |
|                             | PowerFecalPro | QIAampMini         | NS       | NS       |
|                             |               | IndiSpin           | NS       | NS       |
|                             | QIAampMini    | IndiSpin           | NS       | NS       |
| Unweighted UniFrac distance | ZymoBIOMICS   | PowerFecalPro      | 0.001    | 0.002    |
|                             |               | QIAampMini         | 0.001    | 0.002    |
|                             |               | IndiSpin           | 0.001    | 0.002    |
|                             | PowerFecalPro | QIAampMini         | NS       | NS       |
|                             |               | IndiSpin           | 0.015    | 0.023    |
|                             | QIAampMini    | IndiSpin           | NS       | NS       |
| Weighted UniFrac distance   | ZymoBIOMICS   | PowerFecalPro      | NS       | NS       |
|                             |               | QIAampMini         | NS       | NS       |
|                             |               | IndiSpin           | NS       | NS       |
|                             | PowerFecalPro | QIAampMini         | NS       | NS       |
|                             |               | IndiSpin           | NS       | NS       |
|                             | QIAampMini    | IndiSpin           | NS       | NS       |
| Jaccard distance            | ZymoBIOMICS   | PowerFecalPro      | 0.037    | NS       |
|                             |               | QIAampMini         | 0.003    | 0.018    |
|                             |               | IndiSpin           | 0.011    | 0.033    |
|                             | PowerFecalPro | QIAampMini         | NS       | NS       |
|                             |               | IndiSpin           | NS       | NS       |
|                             | QIAampMini    | IndiSpin           | NS       | NS       |
| Bray-Curtis distance        | ZymoBIOMICS   | PowerFecalPro      | NS       | NS       |

|               |            |    |    |
|---------------|------------|----|----|
|               | QIAampMini | NS | NS |
|               | IndiSpin   | NS | NS |
| PowerFecalPro | QIAampMini | NS | NS |
|               | IndiSpin   | NS | NS |
| QIAampMini    | IndiSpin   | NS | NS |

---

Pairwise PERMANOVA was tested for comparing beta diversity of DNA extraction method. NS: not significant.

**Table S1. Diversity analysis in this study**

| No. | Parameter                      | Alpha or Beta diversity | Used data with/without rarefying | Input data with/without phylogenetic information | Plugin of QIIME 2                |
|-----|--------------------------------|-------------------------|----------------------------------|--------------------------------------------------|----------------------------------|
| 1   | Species richness               | Alpha                   | Not rarefied                     | Non-phylogenetic                                 | q2-breakaway (50)                |
| 2   | Faith's Phylogenetic Diversity | Alpha                   | Rarefied                         | Phylogenetic                                     | q2-diversity                     |
| 3   | Observed OTUs                  | Alpha                   | Rarefied                         | Non-phylogenetic                                 | q2-diversity                     |
| 4   | Shannon's diversity index      | Alpha                   | Rarefied                         | Non-phylogenetic                                 | q2-diversity                     |
| 5   | Pielou's Evenness              | Alpha                   | Rarefied                         | Non-phylogenetic                                 | q2-diversity                     |
| 6   | Aitchison distance             | Beta                    | Not rarefied                     | Non-phylogenetic                                 | q2-deicode (51)                  |
| 7   | Unweighted UniFrac distance    | Beta                    | Rarefied                         | Phylogenetic                                     | q2-diversity                     |
| 8   | Weighted UniFrac distance      | Beta                    | Rarefied                         | Phylogenetic                                     | q2-diversity                     |
| 9   | Jaccard distance               | Beta                    | Rarefied                         | Non-phylogenetic                                 | q2-diversity                     |
| 10  | Bray-Curtis distances          | Beta                    | Rarefied                         | Non-phylogenetic                                 | q2-diversity                     |
| 11  | Adonis                         | Beta                    | Rarefied                         | Non-phylogenetic                                 | q2-diversity<br>adonis (46) (47) |

756 **Figure legends**

757 **Fig. 1. Overview of the study design using the 16S rRNA gene to compare the DNA**

758 **extraction protocol for cervical microbiota.** (A) Liquid-based cytology (LBC) specimens from  
759 20 patients with CIN2/3 or suspected CIN2/3. (B) A total of 80 DNA extractions were performed.  
760 (C) The four DNA extraction methods. (D) DNA of mock vaginal community as a positive  
761 control and preservation solution as a negative control. (E) Sequencing using Illumina MiSeq.  
762 (F) Analysis of the taxonomic profiles among the DNA extraction protocols. Images from Togo  
763 Picture Gallery (<http://togotv.dbcls.jp/ja/pics.html>) were used to create this figure.

764

765 **Fig. 2. Taxonomic resolution among DNA extraction protocols.** (A) Relative abundance of

766 microbe at family level (left) and genus level (right) per DNA extraction method showed the  
767 pattern that variance of microbe composition per patient was higher than that per DNA extraction  
768 protocol. These pattern were confirmed by values of Adonis test ( $q^2$ -diversity adonis);  
769 F.Model: 199.4, R<sup>2</sup>: 0.982, and p value: 0.001 for patients and F.Model: 2.9, R<sup>2</sup>: 0.003, and p  
770 value: 0.002 for DNA extraction (46) (47). After all count data of taxonomy were converted to  
771 relative abundance as shown in the y-axis, the top ten taxonomy at each family and genus level  
772 were plotted in colored bar plot and other relatively few taxonomies were not plotted. The 20  
773 patients ID were described in the x-axis. (B) Venn diagrams showed that ZymoBIOMICS had  
774 four unique taxa at family (left) and genus (right) taxonomic level. Thirty-one of 41 families and  
775 45 of 57 genera were detected with all DNA extraction protocols.

776

777 **Fig. 3. Comparisons of alpha diversity between different DNA extraction protocols.** The

778 alpha diversity indices determined by Species richness and Phylogenetic diversity are

779 significantly higher with ZymoBIOMICS in comparison with PowerFecalPro ( $p = 0.025$  and  
780  $0.012$ , respectively, Dunn's test with Benjamini-Hochberg-adjustment). IndiSpin also showed  
781 significantly higher diversity than that of PowerFecalPro using analysis of Species richness ( $p =$   
782  $0.042$ , Dunn's test with Benjamini-Hochberg-adjustment). No significant differences were  
783 observed in other alpha diversity indexes such as observed OTUs, Shannon's diversity index,  
784 and Pielou's Evenness. Zy: ZymoBIOMICS DNA Miniprep Kit, Pro: QIAamp PowerFecal Pro  
785 DNA Kit, QIA: QIAamp DNA Mini Kit, IN: IndiSpin Pathogen Kit.

786

787 **Fig. 4. Distinct detections of microbe among the DNA extraction protocols.** (A) A bar graph  
788 showing 23 significantly enriched taxa with ZymoBIOMICS, 3 with QIAamp DNA Mini Kit,  
789 and 3 with IndiSpin Pathogen Kit determined by the linear discriminant analysis (LDA) effect  
790 size (LEfSe) analyses (48). (B) A taxonomic cladogram from the same LEfSe analyses showing  
791 that the significantly enriched microbiota in ZymoBIOMICS were composed of phylum  
792 *Proteobacteria*. Also note that *Meiothermus* (a member of the phylum *Deinococcus-Thermus*) is  
793 likely an extraction kit contaminant. Zy: ZymoBIOMICS DNA Miniprep Kit, Pro: QIAamp  
794 PowerFecal Pro DNA Kit, QIA: QIAamp DNA Mini Kit, IN: IndiSpin Pathogen Kit. g\_: genus,  
795 f\_: family, o\_: order, c\_: class, p\_: phylum.

796

797 **Fig. S1. Comparison of DNA yields by DNA extraction protocols.** DNA yield of  
798 QIAampMini was significantly higher than that of PowerFecalPro ( $p < 0.001$ , Dunn's test with  
799 Benjamini-Hochberg-adjustment). Also, the DNA yield of ZymoBIOMICS was significantly  
800 higher than that of PowerFecalPro ( $p < 0.001$ , Dunn's test with Benjamini-Hochberg-adjustment).  
801 The amount of DNA was calculated based on the absorbance of nucleic acids measured by

802 Nanodrop One. By the protocol recommended by the manufacturer, nucleic acid (Poly-A carrier)  
803 was used in IndiSpin. Therefore, IndiSpin was excluded from the analysis of DNA yield. The  
804 amount of DNA yield per 100  $\mu$ L ThinPrep sample volume were compared. The bar graph shows  
805 the mean and standard deviation. Zy: ZymoBIOMICS DNA Miniprep Kit, Pro: QIAamp  
806 PowerFecal Pro DNA Kit, QIA: QIAamp DNA Mini Kit.



(A) Liquid-based cytology on cervix

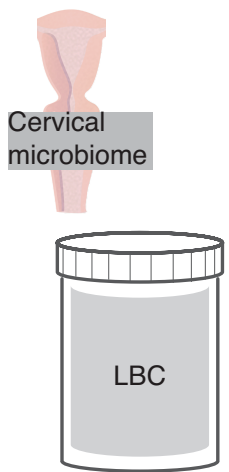

(B) Dispensing of each sample to 4 aliquot

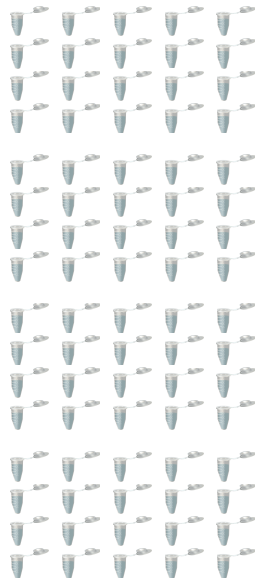

(C) DNA extraction using four protocols

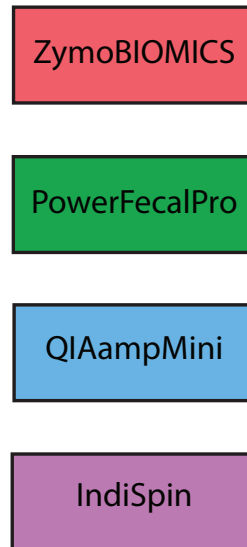

(D)

Positive control  
(vaginal mock)

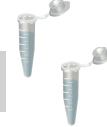

Negative control  
(preservation solution  
without samples)

(E) 16S rRNA  
Illumina ampli-  
con sequencing

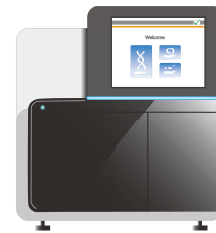

(F) Evaluation of  
taxonomic profiles

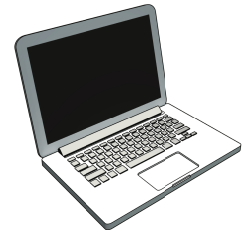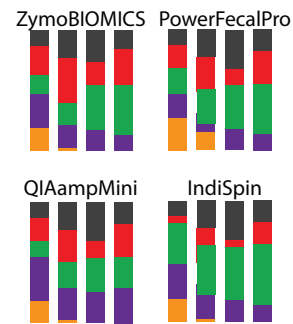

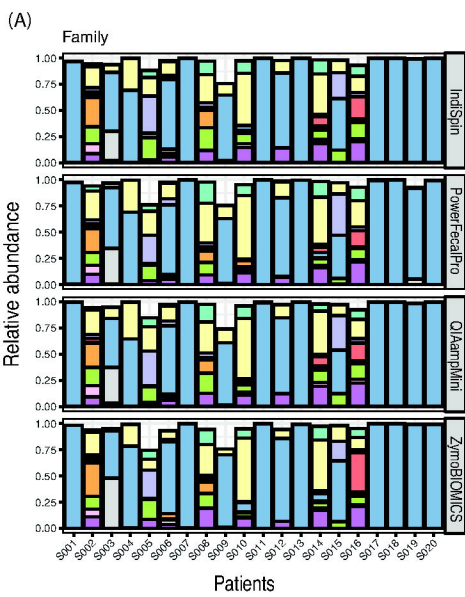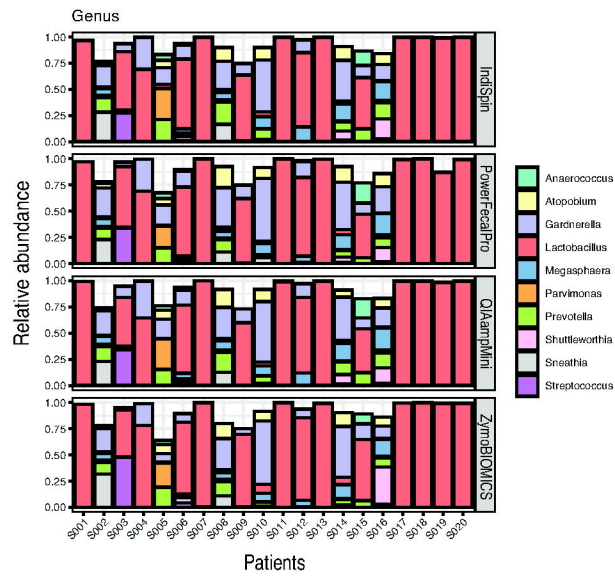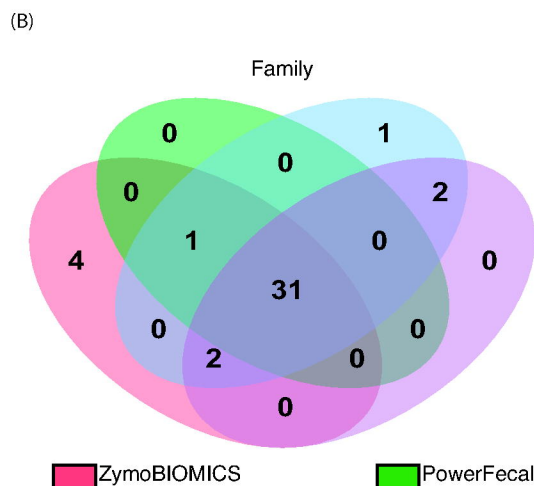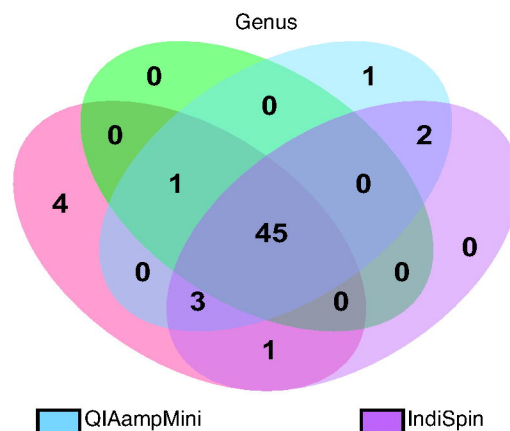

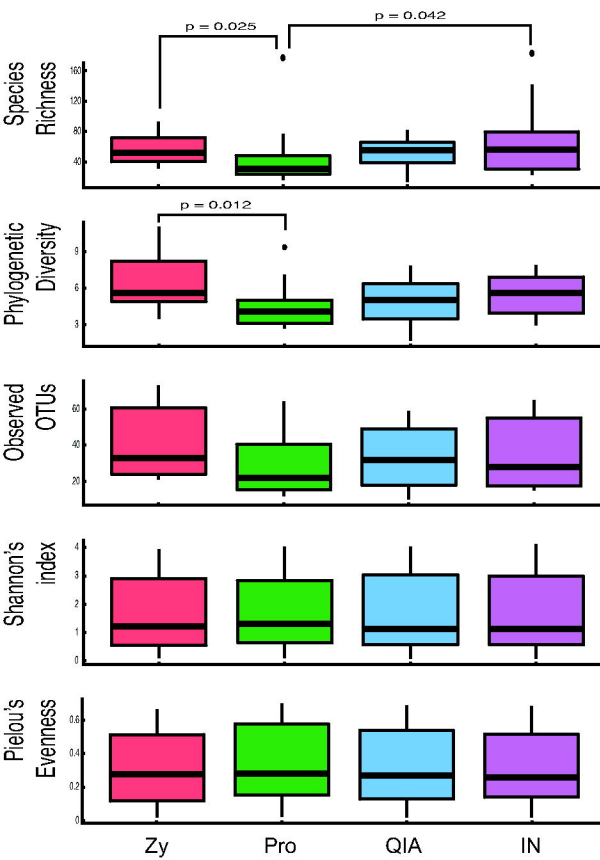

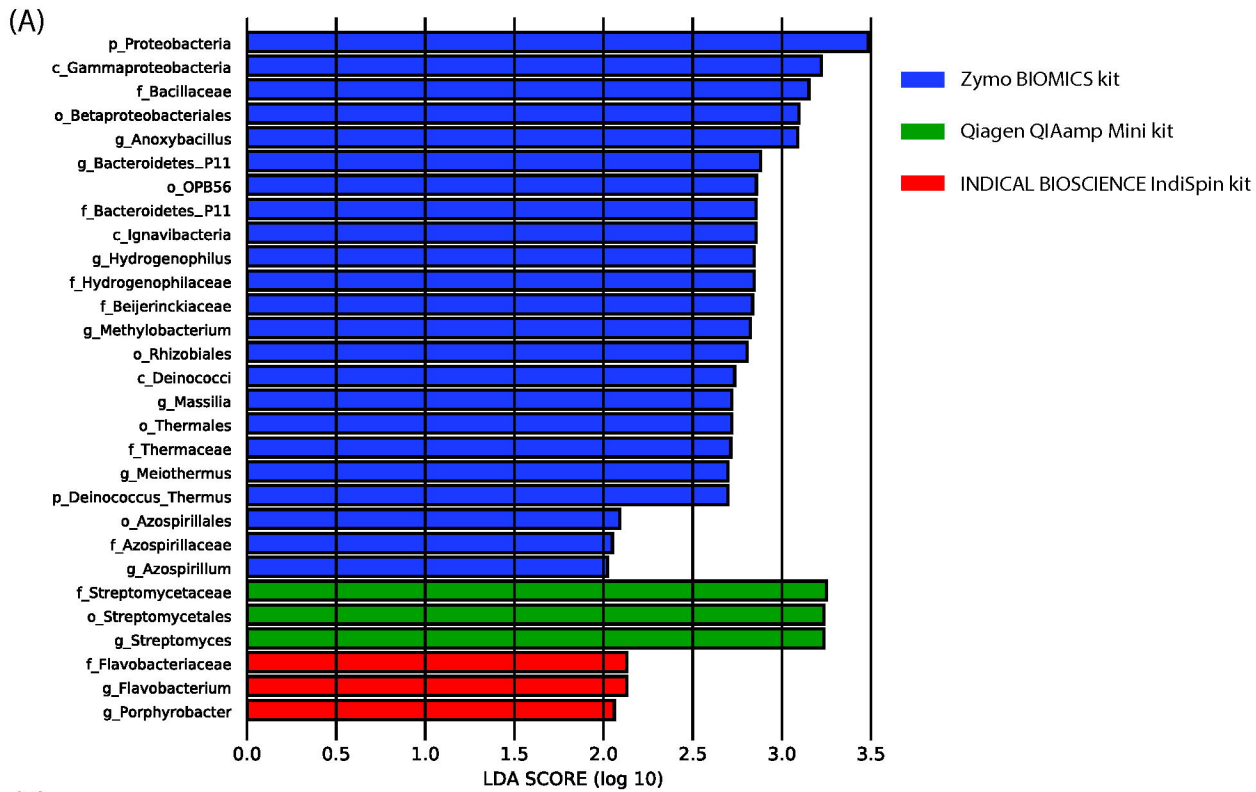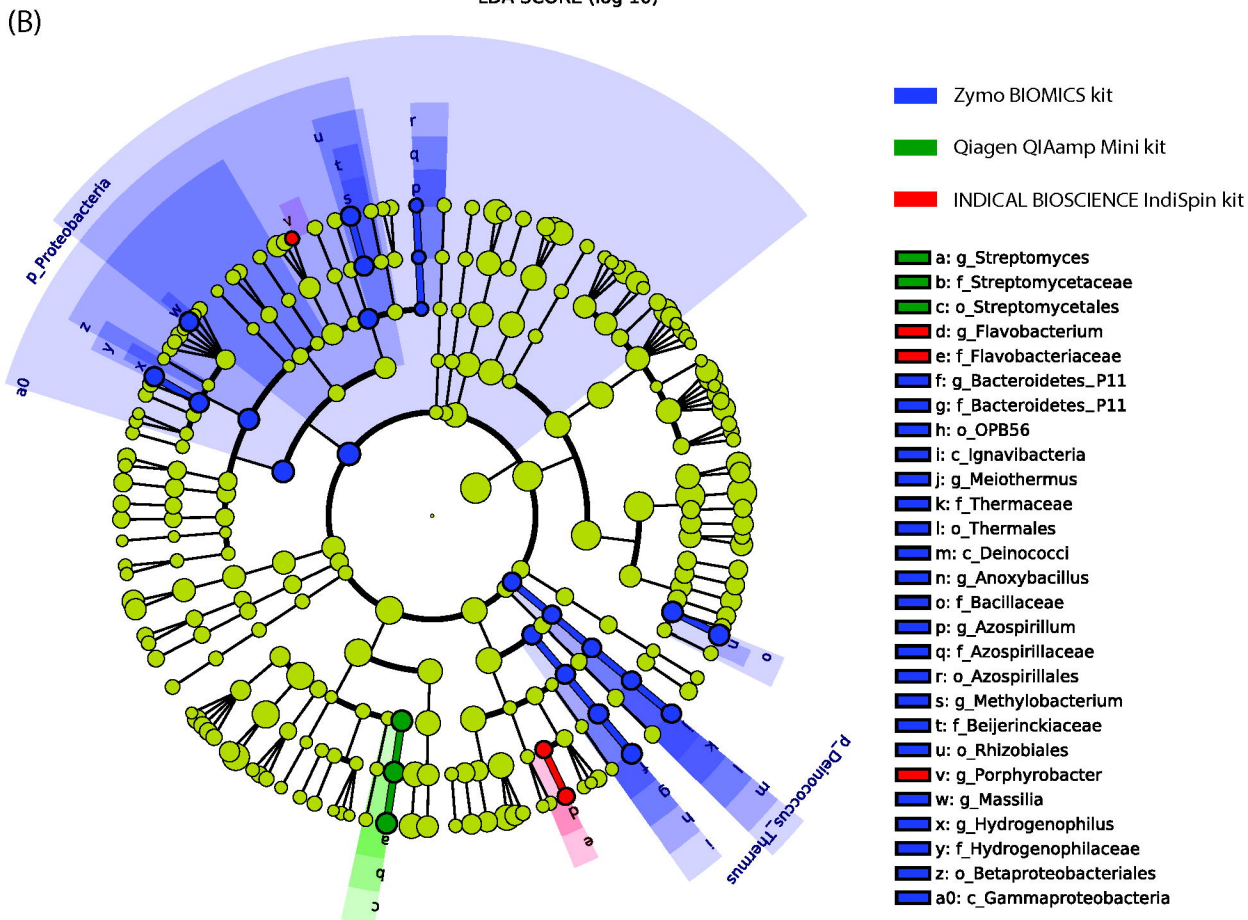

Source: https://biorxiv.org/content/biorxiv/early/2020/01/28/2020.01.27.921619.full-text.pdf
