1 **Evaluation of DNA extraction protocols from liquid-based cytology specimens**  
2 **for studying cervical microbiota**

3

4 Takeo Shibata,<sup>1,2</sup> Mayumi Nakagawa,<sup>1</sup> Hannah N. Coleman,<sup>1</sup> Sarah M. Owens,<sup>3</sup> William W.

5 Greenfield,<sup>4</sup> Toshiyuki Sasagawa,<sup>2</sup> Michael S. Robeson II<sup>5</sup>

6

7 <sup>1</sup>Department of Pathology, University of Arkansas for Medical Sciences, Little Rock, AR, USA

8 <sup>2</sup>Department of Obstetrics and Gynecology, Kanazawa Medical University, Uchinada, Ishikawa,

9 Japan

10 <sup>3</sup>Biosciences Division, Argonne National Laboratory, Lemont, IL, USA

11 <sup>4</sup>Department of Obstetrics and Gynecology, University of Arkansas for Medical Sciences, Little

12 Rock, AR, USA

13 <sup>5</sup>Department of Biomedical Informatics, University of Arkansas for Medical Sciences, Little

14 Rock, AR, USA

15

16 \* Corresponding author: Michael S. Robeson II

17 Email: MRobeson@uams.edu (M.S.R.)

## 18 **Abstract**

19 Cervical microbiota (CM) are considered an important factor affecting the progression of  
20 cervical intraepithelial neoplasia (CIN) and are implicated in the persistence of human  
21 papillomavirus (HPV). Collection of liquid-based cytology (LBC) samples is routine for cervical  
22 cancer screening and HPV genotyping and can be used for long-term cytological biobanking. We  
23 sought to determine whether it is possible to access microbial DNA from LBC specimens, and  
24 compared the performance of four different extraction protocols: (ZymoBIOMICS DNA  
25 Miniprep Kit; QIAamp PowerFecal Pro DNA Kit; QIAamp DNA Mini Kit; and IndiSpin  
26 Pathogen Kit) and their ability to capture the diversity of CM from LBC specimens. LBC  
27 specimens from 20 patients (stored for  $716 \pm 105$  days) with CIN values of 2 or 3 were each  
28 aliquoted for each of the four kits. Loss of microbial diversity due to long-term LBC storage  
29 could not be assessed due to lack of fresh LBC samples. Comparisons with other types of  
30 cervical sampling were not performed. We observed that all DNA extraction kits provided  
31 equivalent accessibility to the cervical microbial DNA within stored LBC samples.  
32 Approximately 80% microbial genera were shared among all DNA extraction protocols.  
33 Potential kit contaminants were observed as well. Variation between individuals was a  
34 significantly greater influence on the observed microbial composition than was the method of  
35 DNA extraction. We also observed that HPV16 was significantly associated with community  
36 types that were not dominated by *Lactobacillus iners*.

37

38 **Keywords;** cervical microbiota, DNA extraction, HPV, CIN, liquid-based cytology

## 39 Introduction

40 High-throughput sequencing (HTS) technology of 16S rRNA gene amplicon sequences has made  
41 it possible to better understand the relationships between cervicovaginal microbiota and human  
42 papillomavirus (HPV) infection [1] [2] [3] [4] [5] and HPV-related diseases [6] [7] [8] [9] [10].  
43 Cervicovaginal microbiota are considered to be an important factor affecting the progress of  
44 cervical intraepithelial neoplasia (CIN) [6] [7] [8] [9] and are implicated in the persistence of  
45 high-risk HPV (HR-HPV) [1] [2] and low-risk HPV (LR-HPV) [3]. However, microbial  
46 signatures associated with either HR-HPV or LR HPV can vary depending on the population  
47 under study, e.g., the phyla *Actinobacteria* and *Fusobacteria* were found to be enriched in HR-  
48 HPV positive Chinese women [4] while another study observed these groups associated with  
49 low-risk HPV (LR-HPV) in South African women [3]. Additionally, *Lactobacillus iners*-  
50 dominant samples are associated with both HR-HPV and LR-HPV [5], often associated with  
51 moderate CIN risk [10]. Moreover, it has been shown that CIN risk was increased in patients  
52 with HR-HPV [10] when the cervical microbes *Atopobium vaginae*, *Gardnerella vaginalis*, and  
53 *Lactobacillus iners* were present in greater proportion compared to *L. crispatus*. The  
54 cervicovaginal microbiome is often described by the abundance of *Lactobacillus spp.*, i.e. the  
55 community is either referred to as a *Lactobacillus*-dominant type or non-*Lactobacillus*-dominant  
56 type, and can interact with the immune system in different ways [7] [11]. For example,  
57 inflammatory cytokines, such as Interleukin (IL)-1 $\alpha$  and IL-18, were increased in non-  
58 *Lactobacillus*-dominant community types of reproductive-aged healthy women [11]. In the  
59 analysis of patients with cervical cancer, non-*Lactobacillus*-dominant community types were  
60 positively associated with chemokines such as interferon gamma-induced protein 10 (IP-10) and  
61 soluble CD40-ligand activating dendritic cells (DCs) [7]. The metabolism of the cervicovaginal

62 microbiome may be a substantial contributing factor to maternal health during pregnancy,  
63 although the mechanism is still unclear [12]. Prior research, on the importance of the microbiome  
64 in cancer therapeutics via checkpoint inhibitors [13], along with our own work on the role of CM  
65 in vaccine response [14], suggests that the CM has a significant role to play in disease  
66 progression and therapeutic treatment. We continue our work here to further assess use liquid-  
67 based cytology (LBC) samples to survey microbial community DNA.

68 Little has been reported on the utility of LBC samples for use in cervical microbiome  
69 studies. Conventionally, microbiome sample collection methods entail the use of swabs [15] or  
70 self-collection of vaginal discharge [16]. To obtain a non-biased and broad range of cervical  
71 microbiota, DNA extraction should be optimized for a range of difficult-to-lyse-bacteria, *e.g.*  
72 *Firmicutes*, *Actinobacteria*, and *Lactobacillus* [15] [17] [18] [19] [20].

73 LBC samples are promising for cervicovaginal microbiome surveys, as they are an  
74 already established method of long-term cytological biobanking [21]. In clinical practice,  
75 cervical cytology for cervical cancer screening or HPV genotyping is widely performed using a  
76 combination of cervical cytobrushes and LBC samples such as ThinPrep (HOLOGIC) or  
77 SurePath (BD). An LBC specimen can be used for not only cytological diagnosis but also  
78 additional diagnostic tests such as HPV, *Chlamydia*, *Neisseria gonorrhoeae*, and *Trichomonas*  
79 infection [22] [23] [24]. Despite the promising potential to use LBC samples for surveying  
80 cervicovaginal microbiota, it is known that DNA contained within LBC samples may degrade  
81 over prolonged storage times when kept at ambient or non-freezing temperatures [25] [26].  
82 Although others have shown minimal DNA degradation of LBC samples stored at -80 °C [26],  
83 the ability to reliably access microbial DNA remains to be seen, and is the focus of our study.

84           Furthermore, the ability to characterize these microbiota, as commonly assessed by 16S  
85 rRNA gene sequencing, can be biased as a result of methodological differences of cell lysis and  
86 DNA extraction protocols [27] [28] [29]. Herein, we compare four different commercially  
87 available DNA extraction kits in an effort to assess their ability to extract and characterize any  
88 viable microbial DNA from stored LBC samples. Additionally, we examine the relationship  
89 between HPV infection and the composition of cervical microbiota still accessible after  
90 prolonged LBC storage.

91

## 92 **Methods**

### 93 **Recruiting patients**

94 Patients were participants of a single center randomized double blind Phase II clinical trial  
95 (NCT02481414) in which enrollees were assigned to receive an HPV therapeutic vaccine called  
96 PepCan or an adjuvant derived from *Candida albicans* (Candin®, Nielsen BioSciences, San  
97 Diego, CA). Pre-injection liquid based cervical cytology (ThinPrep) samples from 20  
98 consecutive enrollees who gave written informed consent between 3/21/2017 and 12/11/2017  
99 were used for this study. Patients were recruited mainly through referrals from clinics from  
100 inside and outside of the medical center. Flyers and Google advertisements were also utilized.  
101 Inclusion Criteria: aged 18–50 years, had recent ( $\leq 60$  days) Pap smear result consistent with  
102 HSIL or “cannot rule out HSIL” or HSIL on colposcopy guided biopsy, untreated for HSIL or  
103 “Cannot rule out HSIL”, able to provide informed consent, willingness and able to comply with  
104 the requirements of the protocol. Exclusion Criteria: history of disease or treatment causing  
105 immunosuppression (e.g., cancer, HIV, organ transplant, autoimmune disease), being pregnant or  
106 attempting to be pregnant within the period of study participation, breast feeding or planning to  
107 breast feed within the period of study participation, allergy to Candida antigen, history of severe  
108 asthma requiring emergency room visit or hospitalization within the past 5 years, history of  
109 invasive squamous cell carcinoma of the cervix, history of having received PepCan. Those who  
110 qualified for the study based on their cervical cytology underwent cervical biopsy, and they  
111 qualified for vaccination if the results were CIN2/3. All collected samples are representative  
112 of a larger population in gynecology clinics with abnormal Pap tests. If in the opinion of the  
113 Principal Investigator or other Investigators, it is not in the best interest of the patient to enter this  
114 study, the patient was excluded. Patients’ age, race, and ethnicity were recorded based on

115 standard NIH requirements. All categories and definitions, *e.g.* ethnicity, age, etc., were based on  
116 NIH Guidelines.

117

## 118 **Sampling of cervical microbiome**

119 The cervical cytology specimens in this current study were collected before the vaccination and  
120 reserved in the vial of the ThinPrep Pap Test (HOLOGIC) as described in Ravilla *et al.* 2019  
121 [14]. The specimens were frozen in an ultra-low temperature freezer (-80°C) on the day of  
122 collection. The storage period from sample collection to DNA extraction was  $716 \pm 105$  days.

123

## 124 **HPV genotyping**

125 HPV-DNA was detected by Linear Array HPV Genotyping Test (Roche Diagnostics) which can  
126 detect up to 37 HPV genotypes using ThinPrep solution [30]. HPV16, 18, 31, 33, 35, 39, 45, 51,  
127 52, 56, 58, 59, and 68 were defined as HR-HPV genotypes; and HPV6, 11, 40, 42, 54, 61, 62, 71,  
128 72, 81, 83, 84, and CP6108 were defined as LR-HPV genotypes [31] [32].

129

## 130 **DNA extraction protocols**

131 We selected four commercially available DNA extraction kits as the candidates for comparison:  
132 ZymoBIOMICS DNA Miniprep Kit (Zymo Research, D4300), QIAamp PowerFecal Pro DNA  
133 Kit (QIAGEN, 51804), QIAamp DNA Mini Kit (QIAGEN, 51304), and IndiSpin Pathogen Kit  
134 (Indical Bioscience, SPS4104). These kits have been successfully used in a variety of human  
135 cervical, vaginal, and gut microbiome surveys [10] [21] [33]. We'll subsequently refer to each of

136 these kits in abbreviated form as follows: ZymoBIOMICS, PowerFecalPro, QIAampMini, and  
 137 IndiSpin. The protocols and any modifications are outlined in Table 1.  
 138

**Table 1: Characteristics of four different DNA extraction protocols**

| Kit (Cat. No.)                        | Manufacturer       | Sample volume | Enzyme                   | Beads                | Beating             | DNA carrier | Others            |
|---------------------------------------|--------------------|---------------|--------------------------|----------------------|---------------------|-------------|-------------------|
| ZymoBIOMICS                           | Zymo               | 300 $\mu$ L   | No                       | Ceramic <sup>a</sup> | 2 min <sup>b</sup>  | No          | <i>c, j</i>       |
| DNA Miniprep Kit (D4300)              | Research           |               |                          |                      |                     |             |                   |
| QIAamp PowerFecal Pro DNA Kit (51804) | Qiagen             | 300 $\mu$ L   | No                       | Ceramic <sup>d</sup> | 10 min <sup>b</sup> | No          | <i>c, j</i>       |
| QIAamp DNA Mini Kit (51304)           | Qiagen             | 200 $\mu$ L   | Mutanolysin <sup>e</sup> | No                   | No                  | No          | <i>c, f, g, j</i> |
| IndiSpin Pathogen Kit (SPS4104)       | Indical Bioscience | 300 $\mu$ L   | No                       | Ceramic <sup>h</sup> | 10 min <sup>b</sup> | Yes         | <i>c, i, j</i>    |

*a*: [34]. *b*: Disruptor Genie (USA Scientific, Inc.) was used under the maximum speed. *c*: Nuclease free water (85  $\mu$ L) as DNA elution buffer was used. *d*: PowerBead Pro Tubes [35]. *e*: Instead of lysozyme or lysostaphin, mutanolysin was used as per Yuan *et al*, 2012 [36]. *f*: DNA Purification from Blood or Body Fluids; Protocols for Bacteria; Isolation of genomic DNA from gram-positive bacteria in QIAamp DNA Mini and Blood Mini Handbook fifth edition was referenced. *g*: Heating at 56°C for 30 min and 95°C for 15 min was performed. *h*: Pathogen Lysis Tubes S [37]. *i*: Pretreatment B2 as per QIAamp cadon Pathogen Mini Handbook. *j*: Samples were thawed at room temperature and immediately extracted at the same temperature following the respective kit instructions.

139



140 Each LBC sample was dispensed into four separate 2 mL sterile collection tubes  
141 (dispensed sample volume = 500  $\mu$ L) to create four cohorts of 20 DNA extractions (Figure 1).  
142 Each extraction cohort was processed through one of the four kits above. A total of 80  
143 extractions (4 kits  $\times$  20 patients) were prepared for subsequent analyses. Applied sample volume  
144 of ThinPrep solution was 300  $\mu$ L for ZymoBIOMICS, 300  $\mu$ L for PowerFecalPro, 200  $\mu$ L for  
145 QIAampMini, and 300  $\mu$ L for IndiSpin. The sample volume was standardized to 300  $\mu$ L as long  
146 as the manufacturer's instructions allowed to do so. DNA extraction for all samples was  
147 performed by the same individual who practiced by performing multiple extractions for each kit  
148 before performing the actual DNA extraction on the samples analyzed in this study. Positive  
149 control was mock vaginal microbial communities composed of a mixture of genomic DNA from  
150 the American Type Culture Collection (ATCC MSA1007). Negative control was the ThinPrep  
151 preservation solution without the sample as blank extraction [38].

152

### 153 **Figure 1. Overview of the study design using 16S rRNA gene to compare the DNA**

154 **extraction protocol.** (A) Liquid-based cytology (LBC) specimens from 20 patients with CIN2/3  
155 or suspected CIN2/3. (B) A total of 80 DNA extractions were performed. (C) The four DNA  
156 extraction methods. (D) DNA of mock vaginal community as a positive control and preservation  
157 solution as a negative control. (E) Sequencing using Illumina MiSeq. (F) Analysis of the  
158 taxonomic profiles among the DNA extraction protocols. Images from Togo Picture Gallery [39]  
159 were used to create this figure.

160

### 161 **Measurement of DNA yield**

162 DNA yield for each method was evaluated by spectrophotometer (Nanodrop One, Thermo  
163 Scientific). Analysis of the DNA yield from IndiSpin was omitted as nucleic acid is used as a  
164 carrier for this kit. The mean DNA yields per 100  $\mu$ L ThinPrep sample volume were compared.

165

## 166 **16S rRNA marker gene sequencing**

167 Controls and the extracted DNA were sent to Argonne National Laboratory (IL, USA) for  
168 amplification and sequencing of the 16S rRNA gene on an Illumina MiSeq sequencing platform  
169 [40]. The same volume of DNA was used for each reaction, and then normalized at the PCR  
170 pooling step. This ensures that equal amounts of each amplified sample are added to the  
171 sequencing pool. Paired-end reads from libraries with ~250-bp inserts were generated for the V4  
172 region using the barcoded primer set: 515FB: 5'-GTGYCAGCMGCCGCGGTAA-3' and 806RB:  
173 5'-GGACTACNVGGGTWTCTAAT-3' [41] [42] [43] [44] [45]. MiSeq Reagent Kit v2 (2  $\times$  150  
174 cycles, MS-102-2002) was used.

175

## 176 **Sequence processing and analysis**

177 Initial sequence processing and analyses were performed using QIIME 2 [46], any commands  
178 prefixed by `q2 -` are QIIME 2 plugins. After demultiplexing of the paired-end reads by `q2 -`  
179 `demux`, the imported sequence data was visually inspected via QIIME 2 View [47], to determine  
180 the appropriate trimming and truncation parameters for generating Exact Sequence Variants  
181 (ESVs) [48] via `q2 -dada2` [49]. ESVs will be referred to as Operational Taxonomic Units  
182 (OTUs). The forward reads were trimmed at 15 bp and truncated at 150 bp; reverse reads were  
183 trimmed at 0 bp and truncated at 150 bp. The resulting OTUs were assigned taxonomy through  
184 `q2-feature-classifier classify-sklearn`, by using a pre-trained classifier for the

185 amplicon region of interest [50]. This enables more robust taxonomic assignment of the OTUs  
186 [51]. Taxonomy-based filtering was performed by using `q2-taxa filter-table` to remove  
187 any OTUs that were classified as “Chloroplast”, “Mitochondria”, “Eukaryota”, “Unclassified”  
188 and those that did not have at least a Phylum-level classification. We then performed additional  
189 quality filtering via `q2-quality-control`, and only retained OTUs that had at least a 90%  
190 identity and 90% query alignment to the SILVA reference set [52]. Then `q2-alignment` was  
191 used to generate a *de novo* alignment with MAFFT [53] which was subsequently masked by  
192 setting `max-gap-frequency 1 min-conservation 0.4`. Finally, `q2-phylogeny`  
193 was used to construct a midpoint-rooted phylogenetic tree using IQ-TREE [54] with automatic  
194 model selection using ModelFinder [55]. Unless specified, subsequent analyses were performed  
195 after removing OTUs with a very low frequency of less than 0.0005% of the total data set in this  
196 case [56].

197

## 198 **Microbiome analysis**

199 To compare the taxonomic profiles among four types of DNA extraction methods (Figure 1 &  
200 Table 1), the following analyses were performed; (I) bacterial microbiome composition, (II)  
201 detection of common and unique taxa, (III) alpha and beta diversity analysis, and (IV)  
202 identification of specific bacteria retained per DNA extraction method.

203

204 Overall microbial composition was investigated at the family and genus taxonomic level. After  
205 all count data of taxonomy were converted to relative abundance, the top 10 abundant taxonomic  
206 groups in each family and genus level were plotted in colored bar plot [57] [58] [59]. Variation

207 of microbiome composition per DNA extraction method or per individual was assessed by the  
208 Adonis test ( $\alpha$ -diversity adonis) [60] [61].

209

210 We set out to determine which microbial taxonomic groups were differentially accessible across  
211 the sampling protocols by LEfSe analyses [62]. We further assessed the microbial taxa using  
212 jvenn [63] at family and genus level. The Venn diagram was created after removing OTUs with a  
213 frequency of less than 0.005% [56]. We used Scheffe test [64] to perform post-hoc analysis of  
214 the LEfSe output.

215

216 Analytical approaches (at the OTU-level) that do not require the rarefying of data, such as  $\alpha$ -  
217 breakaway [65] and Aitchison distance using  $\alpha$ -deicode [66] were used to determine both  
218 alpha (within-sample) and beta (between-sample) diversity respectively. These were compared  
219 with traditional methods, that often require the data to be rarefied. Here we applied the following  
220 traditional alpha and beta-diversity metrics: Faith's Phylogenetic Diversity, Observed OTUs,  
221 Shannon's diversity index, Pielou's Evenness, Unweighted UniFrac distance, Weighted UniFrac  
222 distance, Jaccard distance, and Bray-Curtis distances via  $\alpha$ -diversity [46]. In order to  
223 maintain a reasonable balance between sequencing depth and sample size, we determined that a  
224 rarefaction depth of 51,197 reads allowed us to retain data for all four kits for 15 of the 20  
225 individual patients. Overall, our subsequence analysis consisted of 3,071,820 reads (27.6%,  
226 3,071,820 / 11,149,582 reads). All diversity measurements used in this study are listed in Table  
227 S1.

228

229 **Community type and HPV status**

230 In addition to the analysis above, we tested whether the samples clustered by microbiome  
231 composition were related to the patient's clinical and demographic characteristics such as,  
232 cervical biopsy diagnosis, race, and HPV16 status. HPV16 status has been reported to be  
233 associated with both racial differences as well as microbial community types [14] [67] [68] [69].  
234 We employed the DMM [70] model to determine the number of community types for bacterial  
235 cervical microbiome. Then, we clustered samples to the community type [9] [71]. Since vaginal  
236 microbiota were reported to be clustered with different *Lactobacillus sp.* such as *L. crispatus*, *L.*  
237 *gasseri*, *L. iners*, or *L. jensenii* [18] [72], we also collapsed the taxonomy to the species level and  
238 performed a clustering analysis using “microbiome” R package [59]. We then determined which  
239 bacterial taxa were differentially abundant among the patients with or without HPV16 via  $q_2 -$   
240  $aldex2$  [73] and LEfSe [62].

241

## 242 **General statistical analysis**

243 All data are presented as means  $\pm$  standard deviation (SD). Comparisons were conducted with  
244 Fisher's exact test or Dunn's test with Benjamini-Hochberg-adjustment [74] or Wilcoxon test  
245 with Benjamini-Hochberg-adjustment or pairwise PERMANOVA when appropriate. A p value  $<$   
246 0.05 or a q value  $<$  0.05 was considered statistically significant. We did not control for  
247 confounding variables such as socioeconomic status, nutrition, environmental exposures, or  
248 similar factors.

249

## 250 **Ethics approval and consent to participate**

251 This study was approved by the Institutional Review Board at the University of Arkansas for  
252 Medical Sciences (IRB # 202790). No minors were enrolled in this study.

253

254 **Consent for publication**

255 Written informed consent for publication was obtained for all patients under IRB # 202790; NCT  
256 # NCT02481414; IND # 15173.

257

258 **Availability of data and materials**

259 MIMARKS compliant [75] DNA sequencing data are available via the Sequence Read Archive  
260 (SRA) at the National Center for Biotechnology Information (NCBI), under the BioProject  
261 Accession: PRJNA598197.

262

## 263 **Results**

### 264 **Patient characteristics**

265 The age of the patients (n = 20) was  $31.4 \pm 5.0$  years. The distribution of race was 15% African  
266 American (n = 3), 50% European descent (n = 10), and 35% Hispanic (n = 7). Cervical histology  
267 was 40% CIN2 (n = 8), 50% CIN3 (n = 10), and 10% benign (n = 2). HPV genotypes were 50%  
268 HPV16 positive (n = 10), 10% HPV18 positive (n = 2), 90% HR-HPV positives (n = 18), 45%  
269 LR-HPV positives (n = 9), and 75% multiple HPV positives (n = 15). Patient characteristics were  
270 summarized in Table 2.

271

---

**Table 2. Patient characteristics**

---

| Characteristics                 | Values     |
|---------------------------------|------------|
| Number of patients, n           | 20         |
| Total number of DNA extracts, n | 80         |
| Age, mean (SD)                  | 31.4 (5.0) |
| Race                            |            |
| African American, n (%)         | 3 (15)     |
| European descent, n (%)         | 10 (50)    |
| Hispanic, n (%)                 | 7 (35)     |
| Cervical biopsy                 |            |
| CIN2, n (%)                     | 8 (40)     |
| CIN3, n (%)                     | 10 (50)    |
| Benign, n (%)                   | 2 (10)     |
| HPV typing                      |            |
| HPV positive, n (%)             | 19 (95)    |
| HPV16 positive, n (%)           | 10 (50)    |
| HPV18 positive, n (%)           | 2 (10)     |
| HPV16 or 18 positives, n (%)    | 10 (50)    |

|                         |         |
|-------------------------|---------|
| HR-HPV positives, n (%) | 18 (90) |
| LR-HPV positives, n (%) | 9 (45)  |
| Multiple HPV infections | 15 (75) |

---

SD: standard deviation. CIN: cervical intraepithelial neoplasia. HR-HPV: high-risk HPV (HPV16, 18, 31, 33, 35, 39, 45, 51, 52, 56, 58, 59, and 68). LR-HPV: low-risk HPV (6, 11, 40, 42, 54, 61, 62, 71, 72, 81, 83, 84, and CP 6108)

272

## 273 **DNA yield**

274 DNA yield per 100  $\mu$ L ThinPrep solution was  $0.09 \pm 0.06 \mu$ g in ZymoBIOMICS,  $0.04 \pm 0.01 \mu$ g  
275 in PowerFecalPro, and  $0.21 \pm 0.23 \mu$ g in QIAampMini. DNA yield was not calculated for  
276 IndiSpin, as Poly-A Carrier DNA was used. The DNA yield of PowerFecalPro was significantly  
277 lower than that of ZymoBIOMICS (adjusted p value < 0.001) and QIAampMini (adjusted p  
278 value < 0.001) based on Dunn's test with Benjamini-Hochberg-adjustment (Figure S1).

279

## 280 **Mock and Negative Controls**

281 We observed that we were able to reasonably recover the expected taxa of our mock community  
282 positive control from the American Type Culture Collection (ATCC MSA1007). Each of the  
283 following taxa should have a relative abundance of ~16.7% of the total sample. It should be  
284 noted that factors, such as sample preparation and primer biases, can cause deviations from the  
285 expected mock community [76] [77] [78]. We observed: 7.184% *Gardnerella spp.*, 14.807%  
286 *Lactobacillus jensenii* (40.185% *Lactobacillus spp.*), 16.530% *Mycoplasma hominis*, 14.311%  
287 *Prevotella bivia* (14.327 % *Prevotella spp.*), and 21.429% *Streptococcus agalactiae* (21.449%  
288 *Streptococcus spp.*). A total of 127,193 reads were generated from the mock community control.  
289 Of which, 99.68% (126,783 / 127,193 reads) were from expected members of the mock



290 community. For the negative control (ThinPrep preservation solution) only 1,791 reads were  
 291 generated. 1,400 reads were from *Staphylococcus spp.*, 323 reads were from *Micrococcus spp.*,  
 292 and 47 reads were *Lactobacillus spp.*. The remaining 21 reads were spurious.

293

## 294 **Number of reads and Operational Taxonomic Units (OTUs) before**

### 295 **rarefying**

296 We obtained a total of 11,149,582 reads for 80 DNA extractions. IndiSpin (168,349 ± 57,451  
 297 reads) produced a significantly higher number of reads compared to PowerFecalPro (115,610 ±  
 298 68,201 reads, p value = 0.020, Dunn’s test with Benjamini-Hochberg-adjustment) as shown in  
 299 Table 3 Approximately 90% of reads were assigned to gram-positive bacteria and about 10% of  
 300 reads were assigned to gram-negative bacteria across all kits.

301

**Table 3. Reads and OTUs before rarefying assigned to all, gram-positive, and gram-negative bacteria per DNA extraction protocols**

| Parameters                     | Community | Methods | Values                       | Ratio of GP or GN | p value  |
|--------------------------------|-----------|---------|------------------------------|-------------------|----------|
| Number of reads<br>(mean ± SD) | All       | ZY      | 2,705,044 (135,252 ± 66,011) |                   | <i>a</i> |
|                                |           | PRO     | 2,312,207 (115,610 ± 68,201) |                   |          |
|                                |           | QIA     | 2,765,343 (138,267 ± 49,781) |                   |          |
|                                |           | IN      | 3,366,988 (168,349 ± 57,451) |                   |          |
|                                | GP        | ZY      | 2,430,380 (121,519 ± 56,209) | 89.8%             | <i>b</i> |
|                                |           | PRO     | 2,116,458 (105,823 ± 57,590) | 91.5%             |          |
|                                |           | QIA     | 2,503,578 (125,179 ± 46,073) | 90.5%             |          |
|                                |           | IN      | 2,985,941 (149,297 ± 46,936) | 88.7%             |          |

|              |     |     |                           |       |          |
|--------------|-----|-----|---------------------------|-------|----------|
|              | GN  | ZY  | 274,664 (13,733 ± 29,162) | 10.2% | <i>c</i> |
|              |     | PRO | 195,749 (9,788 ± 23,070)  | 8.5%  |          |
|              |     | QIA | 261,765 (13,088 ± 22,638) | 9.5%  |          |
|              |     | IN  | 381,047 (19,052 ± 33,038) | 11.3% |          |
| Number of    | All | ZY  | 825 (41.3 ± 16.8)         |       | <i>d</i> |
| OTUs (mean ± |     | PRO | 621 (31.1 ± 19.4)         |       |          |
| SD)          |     | QIA | 778 (38.9 ± 22.4)         |       |          |
|              |     | IN  | 792 (39.6 ± 22.7)         |       |          |
|              | GP  | ZY  | 479 (24.0 ± 9.2)          | 58.1% | <i>e</i> |
|              |     | PRO | 412 (20.6 ± 12.7)         | 66.3% |          |
|              |     | QIA | 513 (25.7 ± 13.7)         | 65.9% |          |
|              |     | IN  | 531 (26.6 ± 14.9)         | 67.0% |          |
|              | GN  | ZY  | 346 (17.3 ± 9.8)          | 41.9% | <i>f</i> |
|              |     | PRO | 209 (10.5 ± 10.3)         | 33.7% |          |
|              |     | QIA | 265 (13.3 ± 9.2)          | 34.1% |          |
|              |     | IN  | 261 (13.1 ± 8.3)          | 33.0% |          |

Community of gram-positive bacteria was defined as phylum *Actinobacteria* and *Firmicutes*, which are composed of thick peptidoglycan layers without outer membrane [79]. Community of gram-negative bacteria was defined as a community of bacteria other than phylum *Actinobacteria* and *Firmicutes* in this study. a: IN - PRO: 0.0199; IN - QIA: 0.1590; PRO - QIA: 0.1436; IN - ZY: 0.1495; PRO - ZY: 0.1712; and QIA - ZY: 0.4059. b: IN - PRO: 0.0361; IN - QIA: 0.1435; PRO - QIA: 0.2210; IN - ZY: 0.1717; PRO - ZY: 0.2108; QIA - ZY: 0.4540. c: IN - PRO: 0.5539; IN - QIA: 0.3862; PRO - QIA: 0.4572; IN - ZY: 0.5293; PRO - ZY: 0.9967; QIA - ZY: 0.7573. d: IN - PRO: 0.3101; IN - QIA: 0.4539; PRO - QIA: 0.2514; IN - ZY: 0.2567; PRO - ZY: 0.1194; QIA - ZY: 0.2726. e: IN - PRO: 0.2715; IN - QIA: 0.6809; PRO - QIA: 0.1148; IN - ZY: 0.5463; PRO - ZY: 0.1710; QIA - ZY: 0.4986. f: IN - PRO: 0.2116; IN - QIA: 0.4837; PRO - QIA: 0.1143; IN - ZY: 0.0938; PRO - ZY: 0.0116; QIA - ZY: 0.1448. Dunn's test with Benjamini-Hochberg-adjustment were performed for comparison of the number of reads and OTUs by DNA extraction method. ZY: ZymoBIOMICS DNA Miniprep Kit, PRO: QIAamp PowerFecal Pro DNA Kit, QIA: QIAamp DNA Mini Kit, IN: IndiSpin Pathogen Kit. SD: standard deviation. All:

---

all bacteria, GP: gram-positive bacteria, GN: gram-negative bacteria.

302

303 Prior to rarefying, the ZymoBIOMICS kit captured a greater representation of gram-  
304 negative bacterial OTUs (total 346,  $17.3 \pm 9.8$ ) compared to PowerFecalPro (total 209,  $10.5 \pm$   
305  $10.3$ , p value = 0.012, Dunn's test with Benjamini-Hochberg-adjustment, ratio of gram-negative  
306 bacteria: 41.9% vs 33.7%) as shown in Table 3. No significant differences in the number of  
307 OTUs before rarefying was detected for the entire bacterial community or gram-positive bacteria.

308

### 309 **Microbiome composition per DNA extraction protocol**

310 We analyzed whether differences in DNA extraction methods affect our ability to assess cervical  
311 microbiota composition. The patients can be identified by whether or not they displayed a  
312 *Lactobacillus*-dominant community type (Figures 2A & S4). Variation between patients was a  
313 significantly greater influence on the observed microbial composition than was the method of  
314 DNA extraction (F.Model: 199.4, R2: 0.982, and p value: 0.001 for patients vs F.Model: 2.9, R2:  
315 0.003, and p value: 0.002 for DNA extraction, Adonis test, Figure 2A).

316

317 **Figure 2. Taxonomic resolution among DNA extraction protocols.** (A) Relative abundance of  
318 microbe at family level (left) and genus level (right) per DNA extraction method showed the  
319 pattern that variance of microbe composition per patient was higher than that per DNA extraction  
320 protocol. These patterns were confirmed by values of Adonis test ( $q^2$ -diversity adonis);  
321 F.Model: 199.4, R2: 0.982, and p value: 0.001 for patients and F.Model: 2.9, R2: 0.003, and p  
322 value: 0.002 for DNA extraction [60] [61]. After all count data of taxonomy were converted to  
323 relative abundance as shown in the y-axis, the top ten taxonomy at each family and genus level

324 were plotted in colored bar plot and other relatively few taxonomies were not plotted. The 20  
325 patients ID were described in the x-axis. (B) Venn diagrams, considering only those OTUs with  
326 a frequency greater than 0.005% shown, revealed that ZymoBIOMICS had four unique taxa at  
327 family (left) and genus (right) taxonomic level. Thirty-one of 41 families and 45 of 57 genera  
328 were detected with all DNA extraction protocols.

329  
330 The following top 10 abundant families are shown in Figure 2A (left) and constituted  
331 approximately 95.7% of cervical bacteria in all kits (80 DNA extractions); *Lactobacillaceae*  
332 (58.9%), *Bifidobacteriaceae* (13.7%), *Veillonellaceae* (4.8%), *Prevotellaceae* (4.3%), *Family XI*  
333 (3.9%), *Atopobiaceae* (3.0%), *Leptotrichiaceae* (2.5%), *Streptococcaceae* (2.0%),  
334 *Lachnospiraceae* (1.6%). *Ruminococcaceae* (0.9%). The following top 10 abundant genera are  
335 shown in Figure 2A (right) and constituted approximately 92% of cervical bacteria;  
336 *Lactobacillus* (58.9%), *Gardnerella* (13.6%), *Prevotella* (4.2%), *Megasphaera* (3.7%),  
337 *Atopobium* (3.0%), *Sneathia* (2.5%), *Streptococcus* (1.9%), *Parvimonas* (1.7%), *Shuttleworthia*  
338 (1.4%), and *Anaerococcus* (1.1%).

339

## 340 **Shared and unique microbiota among DNA extraction protocols**

341 All DNA extraction methods were generally commensurate with one another, there were  
342 31 of 41 shared microbes at the family level (Figure 2B left) and 45 of 57 shared microbes at the  
343 genus level (Figure 2B right) among the DNA extraction protocols.

344 However, four gram-negative taxa were uniquely detected by ZymoBIOMICS and one  
345 taxon was uniquely detected by QIAampMini both at the genus level (Figure 2B right). Of the  
346 uniquely detected ZymoBIOMICS OTUs, *Methylobacterium* was detected in 5 of the 80 DNA

347 extractions, consisting of 912 reads: 0.01% of all kit extractions. A member of this genus,  
348 *Methylobacterium aerolatum*, has been reported to be more abundant in the endocervix than the  
349 vagina of healthy South African women [80]. *Bacteroidetes*, which are often reported as  
350 enriched taxa in an HIV positive cervical environment [81], was detected in 12 of the 80 DNA  
351 extractions (1,028 reads; 0.01%). *Meiothermus* was detected in 9 of the 80 DNA extractions (882  
352 reads; 0.01%) and *Hydrogenophilus* was detected in 14 of the 80 DNA extractions (2,488 reads,  
353 0.02%). *Meiothermus* and *Hydrogenophilus* [82] are not considered to reside within the human  
354 environment, and are likely kit contaminants, as previously reported [83]. A unique gram-  
355 positive taxon obtained from the QIAampMini, *Streptomyces*, which was reported to be detected  
356 from the cervicovaginal environment in the study of Kenyan women [84], was detected in all 20  
357 of the QIAampMini DNA extractions (6,862 reads; 0.06%). No unique taxa were detected in  
358 PowerFecalPro and IndiSpin. Although less than 0.005% of the total data set, two samples of  
359 IndiSpin also detected potential kit contaminant, *Tepidiphilus* (*Hydrogenophilaceae*).

360

## 361 **Alpha and beta diversity**

362 The observed alpha diversity was similar across all kits except for a few cases (Figure 3).  
363 Significantly higher species richness ( $\alpha_2$ -breakaway) was observed between the  
364 ZymoBIOMICS ( $56.1 \pm 19.4$ ) protocol and that of PowerFecalPro ( $43.2 \pm 32.9$ ,  $p = 0.025$ )  
365 (Figure 3). Similarly, Faith's Phylogenetic Diversity was observed to be higher with the  
366 ZymoBIOMICS protocol ( $6.6 \pm 2.2$ ), compared to PowerFecalPro ( $4.5 \pm 1.9$ ,  $p = 0.012$ ). The use  
367 of IndiSpin also resulted significantly higher alpha diversity than that of PowerFecalPro in an  
368 analysis of Species richness ( $p = 0.042$ ). Non-phylogenetic alpha diversity metrics such as

369 Observed OTUs, Shannon's diversity index, and Pielou's Evenness did not show differences  
370 among the four methods.

371  
372 **Figure 3. Comparisons of alpha diversity between different DNA extraction protocols.** The  
373 alpha diversity indices determined by Species richness and Phylogenetic diversity are  
374 significantly higher with ZymoBIOMICS in comparison with PowerFecalPro ( $p = 0.025$  and  
375  $0.012$ , respectively, Dunn's test with Benjamini-Hochberg-adjustment). IndiSpin also showed  
376 significantly higher diversity than that of PowerFecalPro using analysis of Species richness ( $p =$   
377  $0.042$ , Dunn's test with Benjamini-Hochberg-adjustment). No significant differences were  
378 observed in other alpha diversity indexes such as observed OTUs, Shannon's diversity index,  
379 and Pielou's Evenness. Zy: ZymoBIOMICS DNA Miniprep Kit, Pro: QIAamp PowerFecal Pro  
380 DNA Kit, QIA: QIAamp DNA Mini Kit, IN: IndiSpin Pathogen Kit.

381  
382 Similar to the alpha diversity results above, no significant differences were observed with  
383 other metrics, including  $q_2$ -deicode (Aichison distances). Only qualitative metrics such as  
384 Unweighted UniFrac and Jaccard distance, revealed significant differences in a few cases (Table  
385 4 Figure S2, & Figure S3). Most observed differences were between ZymoBIOMICS and other  
386 DNA extraction methods with when qualitative metrics such as Unweighted UniFrac  
387 (PowerFecalPro:  $q = 0.002$ ; QIAampMini:  $q = 0.002$ ; and IndiSpin:  $q = 0.002$ ) and Jaccard  
388 distances (QIAampMini:  $q = 0.018$  and IndiSpin:  $q = 0.033$ ) were used. With PowerFecalPro vs.  
389 IndiSpin in Unweighted UniFrac ( $q = 0.023$ ), being the only other observed significant  
390 difference. All other metrics showed no significance differences with regard to beta diversity.  
391

**Table 4. Beta diversity among DNA extraction methods**

| Index                        | Protocol      | Protocols compared | p values     | q values     |
|------------------------------|---------------|--------------------|--------------|--------------|
| Aitchison distance (DEICODE) | ZymoBIOMICS   | PowerFecalPro      | 0.921        | 0.921        |
|                              |               | QIAampMini         | 0.771        | 0.921        |
|                              |               | IndiSpin           | 0.423        | 0.921        |
|                              | PowerFecalPro | QIAampMini         | 0.700        | 0.921        |
|                              |               | IndiSpin           | 0.434        | 0.921        |
|                              | QIAampMini    | IndiSpin           | 0.854        | 0.921        |
| Unweighted UniFrac distance  | ZymoBIOMICS   | PowerFecalPro      | <b>0.001</b> | <b>0.002</b> |
|                              |               | QIAampMini         | <b>0.001</b> | <b>0.002</b> |
|                              |               | IndiSpin           | <b>0.001</b> | <b>0.002</b> |
|                              | PowerFecalPro | QIAampMini         | 0.090        | 0.108        |
|                              |               | IndiSpin           | <b>0.015</b> | <b>0.023</b> |
|                              | QIAampMini    | IndiSpin           | 0.325        | 0.325        |
| Weighted UniFrac distance    | ZymoBIOMICS   | PowerFecalPro      | 0.936        | 0.993        |
|                              |               | QIAampMini         | 0.897        | 0.993        |
|                              |               | IndiSpin           | 0.954        | 0.993        |
|                              | PowerFecalPro | QIAampMini         | 0.982        | 0.993        |
|                              |               | IndiSpin           | 0.959        | 0.993        |
|                              | QIAampMini    | IndiSpin           | 0.993        | 0.993        |
| Jaccard distance             | ZymoBIOMICS   | PowerFecalPro      | <b>0.037</b> | 0.074        |
|                              |               | QIAampMini         | <b>0.003</b> | <b>0.018</b> |
|                              |               | IndiSpin           | <b>0.011</b> | <b>0.033</b> |
|                              | PowerFecalPro | QIAampMini         | 0.184        | 0.276        |
|                              |               | IndiSpin           | 0.526        | 0.526        |
|                              | QIAampMini    | IndiSpin           | 0.256        | 0.307        |
| Bray-Curtis distance         | ZymoBIOMICS   | PowerFecalPro      | 0.995        | 0.999        |

|               |            |       |       |
|---------------|------------|-------|-------|
|               | QIAampMini | 0.990 | 0.999 |
|               | IndiSpin   | 0.996 | 0.999 |
| PowerFecalPro | QIAampMini | 0.999 | 0.999 |
|               | IndiSpin   | 0.996 | 0.999 |
| QIAampMini    | IndiSpin   | 0.999 | 0.999 |

---

Pairwise PERMANOVA was tested for comparing beta diversity of DNA extraction method. Significant values in bold.

392

### 393 **Differential accessibility of microbiota by DNA extraction protocol**

394 Linear discriminant analysis (LDA) effect size (LEfSe) analysis [62], identified several  
395 taxonomic groups, defined with an LDA score of 2 or higher (*one-against-all*), for differential  
396 accessibility by extraction kit: 23 in ZymoBIOMICS, 0 in PowerFecalPro, 3 in QIAampMini,  
397 and 3 in IndiSpin (Figure 4A). The following taxa were found to be highly accessible (LDA  
398 score > 3) with the use of the ZymoBIOMICS kit: Phylum *Proteobacteria*, Class  
399 *Gammaproteobacteria*, Order *Betaproteobacteriales*, Family *Bacillaceae*, and Genus  
400 *Anoxybacillus*. Whereas the Order *Streptomycetales* was highly enriched with the use of the  
401 QIAampMini (LDA score > 3). However, post-hoc analysis of the LEfSe output, using Scheffe  
402 test [64] revealed that only the contaminants *Meiothermus* and *Hydrogenophilus* were enriched  
403 with Zymo, and *Streptomyces* was enriched in QIA (Figure 4A). These results reveal minimal to  
404 no significant enrichment of specific microbiota across extraction kits.

405

406 **Figure 4. Distinct detections of microbe among the DNA extraction protocols.** (A) A bar  
407 graph showing 23 significantly enriched taxa with ZymoBIOMICS, 3 with QIAamp DNA Mini  
408 Kit, and 3 with IndiSpin Pathogen Kit determined by the linear discriminant analysis (LDA)



409 effect size (LEfSe) analyses [62]. Asterisks denote taxa of genus level that were significant after  
410 post-hoc significant testing with Scheffe. (B) A taxonomic cladogram from the same LEfSe  
411 analyses showing that the significantly enriched microbiota in ZymoBIOMICS were composed  
412 of phylum *Proteobacteria*. Also note that *Meiothermus* (a member of the phylum *Deinococcus-*  
413 *Thermus*) *Hydrogenophilaceae* (a member of the phylum *Proteobacteria*), and *Hydrogenophilus*  
414 (a member of the phylum *Proteobacteria*) are likely an extraction kit contaminant. Zy:  
415 ZymoBIOMICS DNA Miniprep Kit, Pro: QIAamp PowerFecal Pro DNA Kit, QIA: QIAamp  
416 DNA Mini Kit, IN: IndiSpin Pathogen Kit. g\_: genus, f\_: family, o\_: order, c\_: class, p\_: phylum.  
417

## 418 **Microbial community type and HPV16**

419 Dirichlet Multinomial Mixtures (DMM) model [70] detected two cervical microbial community  
420 types across all four DNA extraction protocols (Figure S4). Community type I was composed of  
421 the following: *Gardnerella sp.* (ZymoBIOMICS: 17.1%; PowerFecalPro: 20%; QIAampMini:  
422 23%; IndiSpin: 20%), *Lactobacillus iners* (ZymoBIOMICS: 6.3%; PowerFecalPro: 5%;  
423 QIAampMini: 6%; IndiSpin: 5%), *Atopobium vaginae* [10] (ZymoBIOMICS: 3.5%;  
424 PowerFecalPro: 3%; QIAampMini: 4%; IndiSpin: 5%), *Chlamydia trachomatis* (ZymoBIOMICS:  
425 1.9%; PowerFecalPro: 2%; QIAampMini: 3%; IndiSpin: 2%), *Shuttleworthia sp.*  
426 (ZymoBIOMICS: 1.8%; PowerFecalPro: 2%; QIAampMini: 2%; IndiSpin: 2%). Some members  
427 of *Shuttleworthia* are considered to be bacterial vaginosis-associated bacterium (BVAB) [85],  
428 further investigation is required to determine if this OTU is indeed a BVAB. We determined this  
429 community type “high diversity type”. Community type II was is dominated by *Lactobacillus*  
430 *iners* at 88%, 85%, 83%, and 85% respectively for ZymoBIOMICS, PowerFecalPro,  
431 QIAampMini, and IndiSpin.

432           The relationship between HPV16 infection and community type was observed to be  
433 significantly associated with community type I (HPV16 positive patients [n = 9], HPV16  
434 negative patients [n = 1]) and not community type II (HPV16 positive patients [n = 1], HPV16  
435 negative patients [n = 9], p = 0.001, Fisher's exact test) regardless of the DNA extraction kit used  
436 (Figure S4A). In support of this result, analysis of differentially abundant microbiota using  $\alpha$ 2 -  
437  $\alpha$ ldex (Benjamini-Hochberg corrected p value of Wilcoxon test: p < 0.001, standardized  
438 distributional effect size: -1.2) revealed that *Lactobacillus iners* were differentially enriched in  
439 the cervical environment without HPV16. LEfSe analysis also detected that genus *Lactobacillus*  
440 were enriched in the cervical environment without HPV16 (p < 0.001, LDA score: 5.38, Figure  
441 S4B). No significant differences were observed in the relationship between community type and  
442 HPV18 (p = 0.474, Fisher's exact test), HR-HPV (p = 0.474, Fisher's exact test), LR-HPV (p =  
443 0.370, Fisher's exact test), multiple HPV infections (p = 0.303, Fisher's exact test), results of  
444 cervical biopsy (p = 0.554, Fisher's exact test), and race (African Americans vs not-African  
445 Americans: p = 1; European descent vs non-European descent: p = 0.656; Hispanic vs non-  
446 Hispanic: p = 0.350, Fisher's exact test, Figure S4A).

## 447 **Discussion**

448 In this study, we evaluated the utility of LBC specimens for the collection and storage of cervical  
449 samples for microbiome surveys based on the 16S rRNA marker gene. We simultaneously  
450 compared the efficacy of several commonly used DNA extraction protocols on these samples in  
451 an effort to develop a standard operating procedure/protocol (SOP) for such work. We've also  
452 been able to show that there are two cervical microbial community types, which are associated  
453 with the dominance or non-dominance of *Lactobacillus iners* and HPV16 status (Figures 2A &  
454 S4A). The relationship between community types and HPV16 was detected regardless of the  
455 DNA extraction protocol used.

456 This study evaluated the composition of microbiota accessible across all DNA extraction  
457 methods. All kits were commensurate in their ability to capture the microbial composition of  
458 each patient and the two observed cervical microbial community state types, making all of these  
459 protocols viable for discovering broad patterns of microbial diversity. It should be noted,  
460 however, that a singular kit should be used through the entirety of a study to minimize any subtle  
461 differences between samples, particularly when qualitative or richness-based diversity metrics  
462 are used. We detected potential DNA contamination with the ZymoBIOMICS and IndiSpin kits.  
463 The number of OTUs prior to rarefying revealed that the ZymoBIOMICS protocol detected more  
464 gram-negative OTUs than the PowerFecalPro (Figure 2B & Table 3). In particular, LEfSe  
465 analysis has shown that phylum *Proteobacteria* can be better detected with the ZymoBIOMICS  
466 kit (Figure 4). This signature was no longer observed after *post hoc* testing.

467 Although rarefying microbiome data can be problematic [86], it can still provide robust  
468 and interpretable results for diversity analysis [87], we were able to observe commensurate  
469 findings with non-rarefying approaches such as  $q_2$ -breakaway [65],  $q_2$ -deicode [66], and

470 LEfSe [62]. Beta-diversity analysis via Unweighted UniFrac also revealed that ZymoBIOMICS  
471 was significantly different from all other kits (Table 4). There were no differences in non-  
472 phylogenetic indices of alpha diversity (Figure 3). These findings lead us to surmise that  
473 qualitative metrics are more sensitive to differences between extraction kits, while quantitative  
474 metrics were more sensitive to differences between subject (Figures S2 & S3).

475         Although we hypothesized that the detection of difficult-to-lyse-bacteria (*e.g.* gram-  
476 positive bacteria) would vary by kit, we observed no significant differences (Table 3). The  
477 number of reads of gram-positive and gram-negative bacteria also showed that there was no  
478 difference in the four kits (Table 3). This is likely due to several modifications made to the  
479 extraction protocol as outlined in Table 1. That is, we added bead beating and mutanolysin to the  
480 QIAampMini protocol [36]. We also modified the beating time of the ZymoBIOMICS kit down  
481 to 2 minutes from 10 minutes (the latter being recommended by the manufacturer) to minimize  
482 DNA shearing. We may use the extracted DNA from ZymoBIOMICS for long-read amplicon  
483 sequencing platforms such as PacBio (Pacific Biosciences of California, Inc) [88] or MinION  
484 (Oxford Nanopore Technologies) [89] [90]. Excessive shearing can render these samples  
485 unusable for long-read sequencing. It is quite possible that we could have observed even more  
486 diversity with the ZymoBIOMICS kit for our amplicon survey if we conducted bead-beating for  
487 the full 10 minutes.

488         One limitation of our study is the lack of fresh LBC samples that would have enabled  
489 assessment the effects of prolonged storage on determining microbial community composition  
490 due to potential DNA degradation [25]. We think this may be unlikely, as our LBC samples  
491 were immediately frozen in -80°C, and DNA degradation within LBC samples stored at -80°C  
492 has been shown to be minimal [26]. However, the possibility that the observed microbial

493 community composition may not be indicative of the community at the time of sampling remains.  
494 Despite this, our observations are commensurate with several prior studies in this area as  
495 outlined below. Community typing and detection of the differentially abundant microbiota  
496 revealed that *Lactobacillus iners* were more abundant in the cervical ecosystem without HPV16  
497 (Figure S4). These findings are congruent with those of, Usyk *et al.* [91], Lee *et al.* [1], and  
498 Audirac-Chalifour *et al.* [92]. Usyk *et al.*, reported that *L. iners* was associated with clearance of  
499 HR-HPV infections [91]. Lee *et al.* reported that *L. iners* were decreased in HPV positive women  
500 [1]. Also, the results indicated that the proportion of *L. iners* was higher in HPV-negative women  
501 compared to HPV-positive women (relative abundance 14.9% vs 2.1%) was reported by  
502 Audirac-Chalifour *et al.* [92]. Similarly, Tuominen *et al.* [20] reported that *L. iners* were enriched  
503 in HPV negative samples (relative abundance: 47.7%) compared to HPV positive samples  
504 (relative abundance: 18.6%, p value = 0.07) in the study of HPV positive-pregnant women  
505 (HPV16 positive rate: 15%) [93]. As established by the seminal study of Ranjeva *et al.* [94], a  
506 statistical model revealed that colonization of specific HPV types including multi-HPV type  
507 infection depends on host-risk factors such as sexual behavior, race and ethnicity, and smoking.  
508 It is unclear whether the association between the cervical microbiome, host-specific traits, and  
509 persistent infection of specific HPV types, such as HPV16, can be generalized and requires  
510 further investigation.

511 We focused on LBC samples as this is the recommended method of storage for cervical  
512 cytology [95]. We used a sample volume of 200 or 300  $\mu$ L ThinPrep solution in this study. The  
513 Linear Array HPV Genotyping Test (Roche Diagnostics) stably detects  $\beta$ -globin with a base  
514 length of 268 bp as a positive control. Therefore, using a similar sample volume as HPV  
515 genotyping (250  $\mu$ L), it was expected that V4 (250 bp), which is near the base length of  $\beta$ -globin,

516 would be PCR amplified. It has been pointed out by Ling *et al.* [96] that the cervical  
517 environment is of low microbial biomass. To control reagent DNA contamination and estimate  
518 the sample volume, DNA quantification by qPCR before sequencing is recommended [97]. Mitra  
519 *et al* determined a sample volume of 500  $\mu$ L for ThinPrep by qPCR in the cervical microbiome  
520 study comparing sampling methods using cytobrush or swab [21]. The average storage period  
521 from sample collection via LBC to DNA extraction was about two years in this study. Kim *et al.*  
522 reported that DNA from the cervix stored in ThinPrep at room temperature or  $-80^{\circ}\text{C}$  was stable  
523 for at least one year [26]. Meanwhile, Castle *et al.* reported that  $\beta$ -globin DNA fragments of 268  
524 bases or more were detected by PCR in 90 % (27 of 30 samples) of ThinPrep samples stored for  
525 eight years at an uncontrolled ambient temperature followed by a controlled ambient  
526 environment (10–26.7 $^{\circ}\text{C}$ ) [25]. Low-temperature storage may allow the analysis of the short  
527 DNA fragments of the V4 region after even long-term storage, although further research is  
528 needed to confirm the optimal storage period in cervical microbiome studies using ThinPrep.  
529 SurePath LBC specimens are as widely used as ThinPrep, but the presence of formaldehyde  
530 within the SurePath preservation solution raises concerns about accessing enough DNA for  
531 analysis as compared to ThinPrep, which contains methanol [98] [99]. It should also be noted  
532 that other storage solutions, *i.e.*, those using guanidine thiocyanate have been reported for  
533 microbiome surveys of the cervix [100] and feces [101]. A weakness of the current study is that  
534 we did not examine the reproducibility of our results as each sample was extracted using each kit  
535 once as samples were limited in quantity, and we lacked fresh sample controls to assess the  
536 effects of prolonged storage to alter microbial community composition. Although several studies,  
537 have shown general stability and accessibility of DNA [26] [102] [103], there is potential for

538 DNA degradation for samples not stored at low temperatures [25] [26]. However, the use of  
539 actual patient samples rather than mock samples is a strength of our approach.

540

541

## 542 **Conclusions**

543 In conclusion, regardless of the extraction protocol used, all kits provided equivalent broad  
544 accessibility to the cervical microbiome. Observed differences in microbial composition were  
545 due to the significant influence of the individual patient and not the extraction protocol. We have  
546 shown that the ability to characterize cervical microbiota from LBC specimens is possible, we  
547 were limited in our ability to directly assess if the observed microbial community composition  
548 would reflect that of a fresh sample. Despite this limitation, we were able to assess the  
549 relationship between HPV and the cervical microbiome, also supported by Kim *et al.* [26] and  
550 Castle *et al* [25]. Cervical microbiome in patients with HPV16 or HPV18 which causes 70% of  
551 cervical cancers and CIN [104] warrants critical future study. Selection and characterization of  
552 appropriate DNA extraction methods are important for providing an accurate census of cervical  
553 microbiota and the human microbiome in general [27] [28] [29] [36] [26] [25]. Although we  
554 found all four extraction kits to be commensurate in their ability to broadly characterize the CM,  
555 one singular kit should be used throughout the entirety of a given study. This study lends support  
556 to the view that the selection of a DNA extraction kit depends on the questions asked of the data,  
557 and should be taken into account for any cervicovaginal microbiome and HPV research that  
558 leverages LBC specimens for use in clinical practice [17] [105].



## 559 **Acknowledgements**

560 We thank Togo Picture Gallery [39] for stock images shown in Figure 1.

561

## 562 **Competing interests**

563 M.N. is one of the inventors named in the patents and patent applications for the HPV  
564 therapeutic vaccine PepCan. Patent issued: Human Papilloma Virus Therapeutic Vaccine

565 Nakagawa, M. and Chang, B.S. Patent No. 9,974,849 issued on 5/22/2018

566 Patent application: Human Papilloma Virus Therapeutic Vaccine Nakagawa, M. and Chang, B.S.

567 International Application (PCT/US14/60198) filed on 10/11/2014. The remaining authors declare  
568 no conflicts of interest.

569

## 570 **Funding**

571 This work was supported by the National Institutes of Health (R01CA143130, USA), Drs. Mae  
572 and Anderson Nettleship Endowed Chair of Oncologic Pathology (31005156, USA), and the

573 Arkansas Biosciences Institute (the major component of the Tobacco Settlement Proceeds Act of  
574 2000, AWD00052249, USA) awarded to M.N.

575

## 576 **Authors' contributions**

577 M.N. designed and supervised this project. Ta.S. and M.S.R. conducted bioinformatics analysis

578 and wrote paper. Ta.S., H.C., and M.N. created the protocol of DNA extraction. M.N., H.C., S.O.,

579 W.G., and To.S. provided important feedback. Samples in the clinical trial were collected by

580 W.G. and his associates. DNA extraction was conducted by Ta.S. Sequencing of 16S RNA gene

581 was conducted by S.O.

582

## 583 **References**

- 584 1. Lee JE, Lee S, Lee H, Song YM, Lee K, Han MJ, et al. Association of the vaginal  
585 microbiota with human papillomavirus infection in a Korean twin cohort. *PLoS One*.  
586 2013;8(5):e63514. Epub 2013/05/30. doi: 10.1371/journal.pone.0063514. PubMed PMID:  
587 23717441; PubMed Central PMCID: PMCPMC3661536.
- 588 2. Huang X, Li C, Li F, Zhao J, Wan X, Wang K. Cervicovaginal microbiota composition  
589 correlates with the acquisition of high-risk human papillomavirus types. *Int J Cancer*.  
590 2018;143(3):621-34. Epub 2018/02/27. doi: 10.1002/ijc.31342. PubMed PMID: 29479697.
- 591 3. Zhou Y, Wang L, Pei F, Ji M, Zhang F, Sun Y, et al. Patients With LR-HPV Infection  
592 Have a Distinct Vaginal Microbiota in Comparison With Healthy Controls. *Front Cell Infect*  
593 *Microbiol*. 2019;9:294. Epub 2019/09/27. doi: 10.3389/fcimb.2019.00294. PubMed PMID:  
594 31555603; PubMed Central PMCID: PMCPMC6722871.
- 595 4. Onywerea H, Williamson AL, Mbulawa ZZA, Coetzee D, Meiring TL. The cervical  
596 microbiota in reproductive-age South African women with and without human papillomavirus  
597 infection. *Papillomavirus Res*. 2019;7:154-63. Epub 2019/04/16. doi: 10.1016/j.pvr.2019.04.006.  
598 PubMed PMID: 30986570; PubMed Central PMCID: PMCPMC6475661.
- 599 5. Brotman RM, Shardell MD, Gajer P, Tracy JK, Zenilman JM, Ravel J, et al. Interplay  
600 between the temporal dynamics of the vaginal microbiota and human papillomavirus detection. *J*  
601 *Infect Dis*. 2014;210(11):1723-33. Epub 2014/06/20. doi: 10.1093/infdis/jiu330. PubMed PMID:  
602 24943724; PubMed Central PMCID: PMCPMC4296189.
- 603 6. Godoy-Vitorino F, Romaguera J, Zhao C, Vargas-Robles D, Ortiz-Morales G, Vazquez-  
604 Sanchez F, et al. Cervicovaginal Fungi and Bacteria Associated With Cervical Intraepithelial  
605 Neoplasia and High-Risk Human Papillomavirus Infections in a Hispanic Population. *Front*  
606 *Microbiol*. 2018;9:2533. Epub 2018/11/09. doi: 10.3389/fmicb.2018.02533. PubMed PMID:  
607 30405584; PubMed Central PMCID: PMCPMC6208322.
- 608 7. Łaniewski P, Barnes D, Goulder A, Cui H, Roe DJ, Chase DM, et al. Linking  
609 cervicovaginal immune signatures, HPV and microbiota composition in cervical carcinogenesis  
610 in non-Hispanic and Hispanic women. *Sci Rep*. 82018.
- 611 8. Mitra A, MacIntyre DA, Lee YS, Smith A, Marchesi JR, Lehne B, et al. Cervical  
612 intraepithelial neoplasia disease progression is associated with increased vaginal microbiome  
613 diversity. *Sci Rep*. 2015;5:16865. Epub 2015/11/18. doi: 10.1038/srep16865. PubMed PMID:  
614 26574055; PubMed Central PMCID: PMCPMC4648063.
- 615 9. Piyathilake CJ, Ollberding NJ, Kumar R, Macaluso M, Alvarez RD, Morrow CD.  
616 Cervical Microbiota Associated with Higher Grade Cervical Intraepithelial Neoplasia in Women  
617 Infected with High-Risk Human Papillomaviruses. *Cancer Prev Res (Phila)*. 2016;9(5):357-66.  
618 Epub 2016/03/05. doi: 10.1158/1940-6207.CAPR-15-0350. PubMed PMID: 26935422; PubMed  
619 Central PMCID: PMCPMC4869983.
- 620 10. Oh HY, Kim BS, Seo SS, Kong JS, Lee JK, Park SY, et al. The association of uterine  
621 cervical microbiota with an increased risk for cervical intraepithelial neoplasia in Korea. *Clin*  
622 *Microbiol Infect*. 2015;21(7):674 e1-9. Epub 2015/03/11. doi: 10.1016/j.cmi.2015.02.026.  
623 PubMed PMID: 25752224.
- 624 11. De Seta F, Campisciano G, Zanotta N, Ricci G, Comar M. The Vaginal Community State  
625 Types Microbiome-Immune Network as Key Factor for Bacterial Vaginosis and Aerobic

- 626 Vaginitis. *Front Microbiol.* 2019;10:2451. Epub 2019/11/19. doi: 10.3389/fmicb.2019.02451.  
627 PubMed PMID: 31736898; PubMed Central PMCID: PMC6831638.
- 628 12. Oliver A, LaMere B, Weihe C, Wandro S, Lindsay KL, Wadhwa PD, et al.  
629 Cervicovaginal microbiome composition drives metabolic profiles in healthy pregnancy. *bioRxiv*  
630 <https://doi.org/10.1101/840520>. 2019.
- 631 13. Firwana B, Avaritt N, Shields B, Ravilla R, Makhoul I, Hutchins L, et al. Do checkpoint  
632 inhibitors rely on gut microbiota to fight cancer? *J Oncol Pharm Pract.* 2018;24(6):468-72.
- 633 14. Ravilla R, Coleman HN, Chow CE, Chan L, Fuhrman BJ, Greenfield WW, et al. Cervical  
634 Microbiome and Response to a Human Papillomavirus Therapeutic Vaccine for Treating High-  
635 Grade Cervical Squamous Intraepithelial Lesion. *Integr Cancer Ther.*  
636 2019;18:1534735419893063. Epub 2019/12/14. doi: 10.1177/1534735419893063. PubMed  
637 PMID: 31833799; PubMed Central PMCID: PMC6913049.
- 638 15. Human Microbiome Project C. Structure, function and diversity of the healthy human  
639 microbiome. *Nature.* 2012;486(7402):207-14. Epub 2012/06/16. doi: 10.1038/nature11234.  
640 PubMed PMID: 22699609; PubMed Central PMCID: PMC3564958.
- 641 16. Bik EM, Bird SW, Bustamante JP, Leon LE, Nieto PA, Addae K, et al. A novel  
642 sequencing-based vaginal health assay combining self-sampling, HPV detection and genotyping,  
643 STI detection, and vaginal microbiome analysis. *PLoS One.* 2019;14(5):e0215945. Epub  
644 2019/05/03. doi: 10.1371/journal.pone.0215945. PubMed PMID: 31042762; PubMed Central  
645 PMCID: PMC6493738 have received stock options as well as other compensation. Some  
646 authors have patents pending in relation to this work: US Application No 15/198,818, Method  
647 and system for diagnostic testing, Application No 16/084,945, Method and system for  
648 microbiome-derived diagnostics and therapeutics for bacterial vaginosis, and Application No  
649 16/115,542, Method and system for characterization for female reproductive system-related  
650 conditions associated with microorganisms. The data in this article were used in the development  
651 of a commercially available test product developed and marketed by uBiome. This does not alter  
652 our adherence to PLOS ONE policies on sharing data and materials.
- 653 17. Berman HL, McLaren MR, Callahan BJ. Understanding and interpreting community  
654 sequencing measurements of the vaginal microbiome. *BJOG.* 2020;127(2):139-46. Epub  
655 2019/10/10. doi: 10.1111/1471-0528.15978. PubMed PMID: 31597208.
- 656 18. Ravel J, Gajer P, Abdo Z, Schneider GM, Koenig SS, McCulle SL, et al. Vaginal  
657 microbiome of reproductive-age women. *Proc Natl Acad Sci U S A.* 2011;108 Suppl 1:4680-7.  
658 Epub 2010/06/11. doi: 10.1073/pnas.1002611107. PubMed PMID: 20534435; PubMed Central  
659 PMCID: PMC3063603.
- 660 19. Fettweis JM, Serrano MG, Brooks JP, Edwards DJ, Girerd PH, Parikh HI, et al. The  
661 vaginal microbiome and preterm birth. *Nat Med.* 2019;25(6):1012-21. Epub 2019/05/31. doi:  
662 10.1038/s41591-019-0450-2. PubMed PMID: 31142849; PubMed Central PMCID:  
663 PMC6750801.
- 664 20. Tuominen H, Rautava S, Syrjanen S, Collado MC, Rautava J. HPV infection and  
665 bacterial microbiota in the placenta, uterine cervix and oral mucosa. *Sci Rep.* 2018;8(1):9787.  
666 Epub 2018/06/30. doi: 10.1038/s41598-018-27980-3. PubMed PMID: 29955075; PubMed  
667 Central PMCID: PMC6023934.
- 668 21. Mitra A, MacIntyre DA, Mahajan V, Lee YS, Smith A, Marchesi JR, et al. Comparison  
669 of vaginal microbiota sampling techniques: cytobrush versus swab. *Sci Rep.* 2017;7(1):9802.  
670 Epub 2017/08/31. doi: 10.1038/s41598-017-09844-4. PubMed PMID: 28852043; PubMed  
671 Central PMCID: PMC65575119.

- 672 22. Bentz JS. Liquid-based cytology for cervical cancer screening. *Expert Rev Mol Diagn.*  
673 2005;5(6):857-71. Epub 2005/11/01. doi: 10.1586/14737159.5.6.857. PubMed PMID: 16255628.
- 674 23. Gibb RK, Martens MG. The impact of liquid-based cytology in decreasing the incidence  
675 of cervical cancer. *Rev Obstet Gynecol.* 2011;4(Suppl 1):S2-S11. Epub 2011/05/28. PubMed  
676 PMID: 21617785; PubMed Central PMCID: PMCPMC3101960.
- 677 24. Donders GG, Depuydt CE, Bogers JP, Vereecken AJ. Association of *Trichomonas*  
678 *vaginalis* and cytological abnormalities of the cervix in low risk women. *PLoS One.*  
679 2013;8(12):e86266. Epub 2014/01/05. doi: 10.1371/journal.pone.0086266. PubMed PMID:  
680 24386492; PubMed Central PMCID: PMCPMC3875579.
- 681 25. Castle PE, Solomon D, Hildesheim A, Herrero R, Concepcion Bratti M, Sherman ME, et  
682 al. Stability of archived liquid-based cervical cytologic specimens. *Cancer.* 2003;99(2):89-96.  
683 Epub 2003/04/22. doi: 10.1002/cncr.11058. PubMed PMID: 12704688.
- 684 26. Kim Y, Choi KR, Chae MJ, Shin BK, Kim HK, Kim A, et al. Stability of DNA, RNA,  
685 cytomorphology, and immunoantigenicity in Residual ThinPrep Specimens. *APMIS.*  
686 2013;121(11):1064-72. Epub 2013/04/10. doi: 10.1111/apm.12082. PubMed PMID: 23566220.
- 687 27. Costea PI, Zeller G, Sunagawa S, Pelletier E, Alberti A, Levenez F, et al. Towards  
688 standards for human fecal sample processing in metagenomic studies. *Nat Biotechnol.*  
689 2017;35(11):1069-76. Epub 2017/10/03. doi: 10.1038/nbt.3960. PubMed PMID: 28967887.
- 690 28. Stinson LF, Keelan JA, Payne MS. Comparison of Meconium DNA Extraction Methods  
691 for Use in Microbiome Studies. *Front Microbiol.* 2018;9:270. Epub 2018/03/09. doi:  
692 10.3389/fmicb.2018.00270. PubMed PMID: 29515550; PubMed Central PMCID:  
693 PMCPMC5826226.
- 694 29. Teng F, Darveekaran Nair SS, Zhu P, Li S, Huang S, Li X, et al. Impact of DNA  
695 extraction method and targeted 16S-rRNA hypervariable region on oral microbiota profiling. *Sci*  
696 *Rep.* 2018;8(1):16321. Epub 2018/11/07. doi: 10.1038/s41598-018-34294-x. PubMed PMID:  
697 30397210; PubMed Central PMCID: PMCPMC6218491.
- 698 30. Roche Molecular Diagnostics. LINEAR ARRAY® HPV Genotyping.  
699 <https://diagnostics.roche.com/global/en/products/params/linear-array-hpv-genotyping.html>.  
700 Accessed 12 Mar 2020.
- 701 31. de Villiers EM, Fauquet C, Broker TR, Bernard HU, zur Hausen H. Classification of  
702 papillomaviruses. *Virology.* 2004;324(1):17-27. Epub 2004/06/09. doi:  
703 10.1016/j.virol.2004.03.033. PubMed PMID: 15183049.
- 704 32. Munoz N, Bosch FX, de Sanjose S, Herrero R, Castellsague X, Shah KV, et al.  
705 Epidemiologic classification of human papillomavirus types associated with cervical cancer. *N*  
706 *Engl J Med.* 2003;348(6):518-27. Epub 2003/02/07. doi: 10.1056/NEJMoa021641. PubMed  
707 PMID: 12571259.
- 708 33. Virtanen S, Kalliala I, Nieminen P, Salonen A. Comparative analysis of vaginal  
709 microbiota sampling using 16S rRNA gene analysis. *PLoS One.* 2017;12(7):e0181477. Epub  
710 2017/07/21. doi: 10.1371/journal.pone.0181477. PubMed PMID: 28723942; PubMed Central  
711 PMCID: PMCPMC5517051.
- 712 34. Microbial Isolation | ZYMO RESEARCH.  
713 <https://www.zymoresearch.com/pages/microbial-isolation>. Accessed 12 Mar 2020.
- 714 35. PowerBead Tubes - QIAGEN Online Shop.  
715 [https://www.qiagen.com/us/products/discovery-and-translational-research/lab-](https://www.qiagen.com/us/products/discovery-and-translational-research/lab-essentials/plastics/powerbead-tubes/#orderinginformation)  
716 [essentials/plastics/powerbead-tubes/#orderinginformation](https://www.qiagen.com/us/products/discovery-and-translational-research/lab-essentials/plastics/powerbead-tubes/#orderinginformation). Accessed 12 Mar 2020.

- 717 36. Yuan S, Cohen DB, Ravel J, Abdo Z, Forney LJ. Evaluation of methods for the  
718 extraction and purification of DNA from the human microbiome. *PLoS One*. 2012;7(3):e33865.  
719 Epub 2012/03/30. doi: 10.1371/journal.pone.0033865. PubMed PMID: 22457796; PubMed  
720 Central PMCID: PMCPMC3311548.
- 721 37. QIAGEN. Pathogen Lysis Tubes - QIAGEN.  
722 <https://www.qiagen.com/dk/shop/pcr/pathogen-lysis-tubes/>. Accessed 12 Mar 2020.
- 723 38. Kim D, Hofstaedter CE, Zhao C, Mattei L, Tanes C, Clarke E, et al. Optimizing methods  
724 and dodging pitfalls in microbiome research. *Microbiome*. 2017;5(1):52. Epub 2017/05/10. doi:  
725 10.1186/s40168-017-0267-5. PubMed PMID: 28476139; PubMed Central PMCID:  
726 PMCPMC5420141.
- 727 39. Togo Picture Gallery. <http://togotv.dbcls.jp/pics.html>. Accessed 12 Mar 2020.
- 728 40. Caporaso JG, Lauber CL, Walters WA, Berg-Lyons D, Lozupone CA, Turnbaugh PJ, et  
729 al. Global patterns of 16S rRNA diversity at a depth of millions of sequences per sample. *Proc*  
730 *Natl Acad Sci U S A*. 2011;108 Suppl 1(Supplement 1):4516-22. Epub 2010/06/11. doi:  
731 10.1073/pnas.1000080107. PubMed PMID: 20534432; PubMed Central PMCID:  
732 PMCPMC3063599.
- 733 41. Thompson LR, Sanders JG, McDonald D, Amir A, Ladau J, Locey KJ, et al. A  
734 communal catalogue reveals Earth's multiscale microbial diversity. *Nature*. 2017;551(7681):457-  
735 63. Epub 2017/11/02. doi: 10.1038/nature24621. PubMed PMID: 29088705; PubMed Central  
736 PMCID: PMCPMC6192678.
- 737 42. Apprill A, McNally S, Parsons R, Weber L. Minor revision to V4 region SSU rRNA  
738 806R gene primer greatly increases detection of SAR11 bacterioplankton. *Aquat Microb Ecol*.  
739 2015;75(2):129-37. doi: 10.3354/ame01753. PubMed PMID: WOS:000357106200004.
- 740 43. Parada AE, Needham DM, Fuhrman JA. Every base matters: assessing small subunit  
741 rRNA primers for marine microbiomes with mock communities, time series and global field  
742 samples. *Environ Microbiol*. 2016;18(5):1403-14. Epub 2015/08/15. doi: 10.1111/1462-  
743 2920.13023. PubMed PMID: 26271760.
- 744 44. Walters W, Hyde ER, Berg-Lyons D, Ackermann G, Humphrey G, Parada A, et al.  
745 Improved Bacterial 16S rRNA Gene (V4 and V4-5) and Fungal Internal Transcribed Spacer  
746 Marker Gene Primers for Microbial Community Surveys. *mSystems*. 2016;1(1). Epub  
747 2016/11/09. doi: 10.1128/mSystems.00009-15. PubMed PMID: 27822518; PubMed Central  
748 PMCID: PMCPMC5069754.
- 749 45. Earth Microbiome Project. 16S Illumina amplicon protocol.  
750 <http://www.earthmicrobiome.org/protocols-and-standards/16s/>. Accessed 12 Mar 2020.
- 751 46. Bolyen E, Rideout JR, Dillon MR, Bokulich NA, Abnet CC, Al-Ghalith GA, et al.  
752 Reproducible, interactive, scalable and extensible microbiome data science using QIIME 2. *Nat*  
753 *Biotechnol*. 2019;37(8):852-7. Epub 2019/07/26. doi: 10.1038/s41587-019-0209-9. PubMed  
754 PMID: 31341288; PubMed Central PMCID: PMCPMC7015180.
- 755 47. QIIME 2 View. <https://view.qiime2.org/>. Accessed 12 Mar 2020.
- 756 48. Callahan BJ, McMurdie PJ, Holmes SP. Exact sequence variants should replace  
757 operational taxonomic units in marker-gene data analysis. *ISME J*. 2017;11(12):2639-43. Epub  
758 2017/07/22. doi: 10.1038/ismej.2017.119. PubMed PMID: 28731476; PubMed Central PMCID:  
759 PMCPMC5702726.
- 760 49. Callahan BJ, McMurdie PJ, Rosen MJ, Han AW, Johnson AJ, Holmes SP. DADA2:  
761 High-resolution sample inference from Illumina amplicon data. *Nat Methods*. 2016;13(7):581-3.

- 762 Epub 2016/05/24. doi: 10.1038/nmeth.3869. PubMed PMID: 27214047; PubMed Central  
763 PMCID: PMCPMC4927377.
- 764 50. Bokulich NA, Kaehler BD, Rideout JR, Dillon M, Bolyen E, Knight R, et al. Optimizing  
765 taxonomic classification of marker-gene amplicon sequences with QIIME 2's q2-feature-  
766 classifier plugin. *Microbiome*. 2018;6(1):90. Epub 2018/05/19. doi: 10.1186/s40168-018-0470-z.  
767 PubMed PMID: 29773078; PubMed Central PMCID: PMCPMC5956843.
- 768 51. Werner JJ, Koren O, Hugenholtz P, DeSantis TZ, Walters WA, Caporaso JG, et al.  
769 Impact of training sets on classification of high-throughput bacterial 16s rRNA gene surveys.  
770 *ISME J*. 2012;6(1):94-103. Epub 2011/07/01. doi: 10.1038/ismej.2011.82. PubMed PMID:  
771 21716311; PubMed Central PMCID: PMCPMC3217155.
- 772 52. Quast C, Pruesse E, Yilmaz P, Gerken J, Schweer T, Yarza P, et al. The SILVA  
773 ribosomal RNA gene database project: improved data processing and web-based tools. *Nucleic  
774 Acids Res*. 2013;41(Database issue):D590-6. Epub 2012/11/30. doi: 10.1093/nar/gks1219.  
775 PubMed PMID: 23193283; PubMed Central PMCID: PMCPMC3531112.
- 776 53. Katoh K, Standley DM. MAFFT multiple sequence alignment software version 7:  
777 improvements in performance and usability. *Mol Biol Evol*. 2013;30(4):772-80. Epub  
778 2013/01/19. doi: 10.1093/molbev/mst010. PubMed PMID: 23329690; PubMed Central PMCID:  
779 PMCPMC3603318.
- 780 54. Nguyen LT, Schmidt HA, von Haeseler A, Minh BQ. IQ-TREE: a fast and effective  
781 stochastic algorithm for estimating maximum-likelihood phylogenies. *Mol Biol Evol*.  
782 2015;32(1):268-74. Epub 2014/11/06. doi: 10.1093/molbev/msu300. PubMed PMID: 25371430;  
783 PubMed Central PMCID: PMCPMC4271533.
- 784 55. Kalyanamoorthy S, Minh BQ, Wong TKF, von Haeseler A, Jermin LS. ModelFinder:  
785 fast model selection for accurate phylogenetic estimates. *Nat Methods*. 2017;14(6):587-9. Epub  
786 2017/05/10. doi: 10.1038/nmeth.4285. PubMed PMID: 28481363; PubMed Central PMCID:  
787 PMCPMC5453245.
- 788 56. Bokulich NA, Subramanian S, Faith JJ, Gevers D, Gordon JI, Knight R, et al. Quality-  
789 filtering vastly improves diversity estimates from Illumina amplicon sequencing. *Nat Methods*.  
790 2013;10(1):57-9. Epub 2012/12/04. doi: 10.1038/nmeth.2276. PubMed PMID: 23202435;  
791 PubMed Central PMCID: PMCPMC3531572.
- 792 57. McMurdie PJ, Holmes S. phyloseq: an R package for reproducible interactive analysis  
793 and graphics of microbiome census data. *PLoS One*. 2013;8(4):e61217. Epub 2013/05/01. doi:  
794 10.1371/journal.pone.0061217. PubMed PMID: 23630581; PubMed Central PMCID:  
795 PMCPMC3632530.
- 796 58. Bisanz JE. qiime2R: Importing QIIME2 artifacts and associated data into R sessions.  
797 <https://github.com/jbisanz/qiime2R>. Accessed 12 Mar 2020.
- 798 59. Lahti L, Shetty S. microbiome R package. <http://microbiome.github.io>. Accessed 12 Mar  
799 2020.
- 800 60. Anderson MJ. A new method for non-parametric multivariate analysis of variance.  
801 *Austral Ecol*. 2001;26(1):32-46. doi: DOI 10.1111/j.1442-9993.2001.01070.pp.x. PubMed  
802 PMID: WOS:000167002000004.
- 803 61. Oksanen J, Blanchet FG, Friendly M, Kindt R, Legendre P, McGlenn D, et al. vegan:  
804 Community Ecology Package. R package version 2.5-3. [https://CRAN.R-  
805 project.org/package=vegan](https://CRAN.R-project.org/package=vegan). Accessed 12 Mar 2020.
- 806 62. Segata N, Izard J, Waldron L, Gevers D, Miropolsky L, Garrett WS, et al. Metagenomic  
807 biomarker discovery and explanation. *Genome Biol*. 2011;12(6):R60. Epub 2011/06/28. doi:

- 808 10.1186/gb-2011-12-6-r60. PubMed PMID: 21702898; PubMed Central PMCID:  
809 PMCPMC3218848.
- 810 63. Bardou P, Mariette J, Escudie F, Djemiel C, Klopp C. jvenn: an interactive Venn diagram  
811 viewer. BMC Bioinformatics. 2014;15(1):293. Epub 2014/09/02. doi: 10.1186/1471-2105-15-  
812 293. PubMed PMID: 25176396; PubMed Central PMCID: PMCPMC4261873.
- 813 64. Cao Y. microbiomeMarker: microbiome biomarker analysis. R package version  
814 0.0.1.9000. <https://github.com/yiluheihe/microbiomeMarker>. Accessed 21 Nov 2020. doi: DOI:  
815 10.5281/zenodo.3749415.
- 816 65. Willis A, Bunge J. Estimating diversity via frequency ratios. Biometrics.  
817 2015;71(4):1042-9. Epub 2015/06/04. doi: 10.1111/biom.12332. PubMed PMID: 26038228.
- 818 66. Martino C, Morton JT, Marotz CA, Thompson LR, Tripathi A, Knight R, et al. A Novel  
819 Sparse Compositional Technique Reveals Microbial Perturbations. mSystems. 2019;4(1). Epub  
820 2019/02/26. doi: 10.1128/mSystems.00016-19. PubMed PMID: 30801021; PubMed Central  
821 PMCID: PMCPMC6372836.
- 822 67. Gao W, Weng J, Gao Y, Chen X. Comparison of the vaginal microbiota diversity of  
823 women with and without human papillomavirus infection: a cross-sectional study. BMC Infect  
824 Dis. 2013;13(1):271. Epub 2013/06/14. doi: 10.1186/1471-2334-13-271. PubMed PMID:  
825 23758857; PubMed Central PMCID: PMCPMC3684509.
- 826 68. Montealegre JR, Peckham-Gregory EC, Marquez-Do D, Dillon L, Guillaud M, Adler-  
827 Storthz K, et al. Racial/ethnic differences in HPV 16/18 genotypes and integration status among  
828 women with a history of cytological abnormalities. Gynecol Oncol. 2018;148(2):357-62. Epub  
829 2017/12/26. doi: 10.1016/j.ygyno.2017.12.014. PubMed PMID: 29276057; PubMed Central  
830 PMCID: PMCPMC5801201.
- 831 69. Xi LF, Kiviat NB, Hildesheim A, Galloway DA, Wheeler CM, Ho J, et al. Human  
832 papillomavirus type 16 and 18 variants: race-related distribution and persistence. J Natl Cancer  
833 Inst. 2006;98(15):1045-52. Epub 2006/08/03. doi: 10.1093/jnci/djj297. PubMed PMID:  
834 16882941.
- 835 70. Morgan M. DirichletMultinomial: Dirichlet-Multinomial Mixture Model Machine  
836 Learning for Microbiome Data.  
837 <http://bioconductor.org/packages/release/bioc/html/DirichletMultinomial.html>. Accessed 12 Mar  
838 2020.
- 839 71. Holmes I, Harris K, Quince C. Dirichlet multinomial mixtures: generative models for  
840 microbial metagenomics. PLoS One. 2012;7(2):e30126. Epub 2012/02/10. doi:  
841 10.1371/journal.pone.0030126. PubMed PMID: 22319561; PubMed Central PMCID:  
842 PMCPMC3272020.
- 843 72. DiGiulio DB, Callahan BJ, McMurdie PJ, Costello EK, Lyell DJ, Robaczewska A, et al.  
844 Temporal and spatial variation of the human microbiota during pregnancy. Proc Natl Acad Sci U  
845 S A. 2015;112(35):11060-5. Epub 2015/08/19. doi: 10.1073/pnas.1502875112. PubMed PMID:  
846 26283357; PubMed Central PMCID: PMCPMC4568272.
- 847 73. Fernandes AD, Macklaim JM, Linn TG, Reid G, Gloor GB. ANOVA-like differential  
848 expression (ALDEx) analysis for mixed population RNA-Seq. PLoS One. 2013;8(7):e67019.  
849 Epub 2013/07/12. doi: 10.1371/journal.pone.0067019. PubMed PMID: 23843979; PubMed  
850 Central PMCID: PMCPMC3699591.
- 851 74. Dinno A. dunn.test: Dunn's Test of Multiple Comparisons Using Rank Sums.  
852 <https://CRAN.R-project.org/package=dunn.test>. Accessed 12 Mar 2020.



- 853 75. Yilmaz P, Kottmann R, Field D, Knight R, Cole JR, Amaral-Zettler L, et al. Minimum  
854 information about a marker gene sequence (MIMARKS) and minimum information about any  
855 (x) sequence (MIXS) specifications. *Nat Biotechnol.* 2011;29(5):415-20. Epub 2011/05/10. doi:  
856 10.1038/nbt.1823. PubMed PMID: 21552244; PubMed Central PMCID: PMCPMC3367316.
- 857 76. Silverman JD, Bloom RJ, Jiang S, Durand HK, Mukherjee S, David LA. Measuring and  
858 mitigating PCR bias in microbiome data. *BioRxiv.* 2019:604025.
- 859 77. Laursen MF, Dalgaard MD, Bahl MI. Genomic GC-Content Affects the Accuracy of 16S  
860 rRNA Gene Sequencing Based Microbial Profiling due to PCR Bias. *Front Microbiol.*  
861 2017;8:1934. Epub 2017/10/21. doi: 10.3389/fmicb.2017.01934. PubMed PMID: 29051756;  
862 PubMed Central PMCID: PMCPMC5633598.
- 863 78. Schloss PD, Gevers D, Westcott SL. Reducing the effects of PCR amplification and  
864 sequencing artifacts on 16S rRNA-based studies. *PLoS One.* 2011;6(12):e27310. Epub  
865 2011/12/24. doi: 10.1371/journal.pone.0027310. PubMed PMID: 22194782; PubMed Central  
866 PMCID: PMCPMC3237409.
- 867 79. Silhavy TJ, Kahne D, Walker S. The bacterial cell envelope. *Cold Spring Harb Perspect*  
868 *Biol.* 2010;2(5):a000414. Epub 2010/05/11. doi: 10.1101/cshperspect.a000414. PubMed PMID:  
869 20452953; PubMed Central PMCID: PMCPMC2857177.
- 870 80. Balle C, Lennard K, Dabee S, Barnabas SL, Jaumdally SZ, Gasper MA, et al.  
871 Endocervical and vaginal microbiota in South African adolescents with asymptomatic  
872 Chlamydia trachomatis infection. *Sci Rep.* 2018;8(1):11109. Epub 2018/07/25. doi:  
873 10.1038/s41598-018-29320-x. PubMed PMID: 30038262; PubMed Central PMCID:  
874 PMCPMC6056523.
- 875 81. Klein C, Gonzalez D, Samwel K, Kahesa C, Mwaiselage J, Aluthge N, et al. Relationship  
876 between the Cervical Microbiome, HIV Status, and Precancerous Lesions. *mBio.* 2019;10(1).  
877 Epub 2019/02/21. doi: 10.1128/mBio.02785-18. PubMed PMID: 30782659; PubMed Central  
878 PMCID: PMCPMC6381280.
- 879 82. Hayashi NR, Ishida T, Yokota A, Kodama T, Igarashi Y. *Hydrogenophilus*  
880 *thermoluteolus* gen. nov., sp. nov., a thermophilic, facultatively chemolithoautotrophic,  
881 hydrogen-oxidizing bacterium. *Int J Syst Bacteriol.* 1999;49 Pt 2:783-6. Epub 1999/05/13. doi:  
882 10.1099/00207713-49-2-783. PubMed PMID: 10319503.
- 883 83. Glassing A, Dowd SE, Galandiuk S, Davis B, Chiodini RJ. Inherent bacterial DNA  
884 contamination of extraction and sequencing reagents may affect interpretation of microbiota in  
885 low bacterial biomass samples. *Gut Pathog.* 82016.
- 886 84. Birse KD, Romas LM, Guthrie BL, Nilsson P, Bosire R, Kiarie J, et al. Genital Injury  
887 Signatures and Microbiome Alterations Associated With Depot Medroxyprogesterone Acetate  
888 Usage and Intravaginal Drying Practices. *J Infect Dis.* 2017;215(4):590-8. Epub 2016/12/25. doi:  
889 10.1093/infdis/jiw590. PubMed PMID: 28011908; PubMed Central PMCID: PMCPMC5388302.
- 890 85. Lennard K, Dabee S, Barnabas SL, Havyarimana E, Blakney A, Jaumdally SZ, et al.  
891 Microbial Composition Predicts Genital Tract Inflammation and Persistent Bacterial Vaginosis  
892 in South African Adolescent Females. *Infect Immun.* 2018;86(1). Epub 2017/10/19. doi:  
893 10.1128/IAI.00410-17. PubMed PMID: 29038128; PubMed Central PMCID: PMCPMC5736802.
- 894 86. McMurdie PJ, Holmes S. Waste not, want not: why rarefying microbiome data is  
895 inadmissible. *PLoS Comput Biol.* 2014;10(4):e1003531. Epub 2014/04/05. doi:  
896 10.1371/journal.pcbi.1003531. PubMed PMID: 24699258; PubMed Central PMCID:  
897 PMCPMC3974642.

- 898 87. Weiss S, Xu ZZ, Peddada S, Amir A, Bittinger K, Gonzalez A, et al. Normalization and  
899 microbial differential abundance strategies depend upon data characteristics. *Microbiome*.  
900 2017;5(1):27. Epub 2017/03/04. doi: 10.1186/s40168-017-0237-y. PubMed PMID: 28253908;  
901 PubMed Central PMCID: PMC5335496.
- 902 88. Callahan BJ, Wong J, Heiner C, Oh S, Theriot CM, Gulati AS, et al. High-throughput  
903 amplicon sequencing of the full-length 16S rRNA gene with single-nucleotide resolution.  
904 *Nucleic Acids Res*. 2019;47(18):e103. Epub 2019/07/04. doi: 10.1093/nar/gkz569. PubMed  
905 PMID: 31269198; PubMed Central PMCID: PMC6765137.
- 906 89. Calus ST, Ijaz UZ, Pinto AJ. NanoAmpli-Seq: a workflow for amplicon sequencing for  
907 mixed microbial communities on the nanopore sequencing platform. *Gigascience*. 2018;7(12).  
908 Epub 2018/11/27. doi: 10.1093/gigascience/giy140. PubMed PMID: 30476081; PubMed Central  
909 PMCID: PMC6298384.
- 910 90. Wongsurawat T, Nakagawa M, Atiq O, Coleman HN, Jenjaroenpun P, Allred JI, et al. An  
911 assessment of Oxford Nanopore sequencing for human gut metagenome profiling: A pilot study  
912 of head and neck cancer patients. *J Microbiol Methods*. 2019;166:105739. Epub 2019/10/19. doi:  
913 10.1016/j.mimet.2019.105739. PubMed PMID: 31626891; PubMed Central PMCID:  
914 PMC6956648.
- 915 91. Usyk M, Zolnik CP, Castle PE, Porras C, Herrero R, Gradissimo A, et al. Cervicovaginal  
916 microbiome and natural history of HPV in a longitudinal study. *PLoS Pathog*.  
917 2020;16(3):e1008376. Epub 2020/03/28. doi: 10.1371/journal.ppat.1008376. PubMed PMID:  
918 32214382; PubMed Central PMCID: PMC67098574 Schiller and Douglas R. Lowy report  
919 that they are named inventors on US Government-owned HPV vaccine patents that are licensed  
920 to GlaxoSmithKline and Merck and for which the National Cancer Institute receives licensing  
921 fees. They are entitled to limited royalties as specified by federal law.
- 922 92. Audirac-Chalifour A, Torres-Poveda K, Bahena-Roman M, Tellez-Sosa J, Martinez-  
923 Barnette J, Cortina-Ceballos B, et al. Cervical Microbiome and Cytokine Profile at Various  
924 Stages of Cervical Cancer: A Pilot Study. *PLoS One*. 2016;11(4):e0153274. Epub 2016/04/27.  
925 doi: 10.1371/journal.pone.0153274. PubMed PMID: 27115350; PubMed Central PMCID:  
926 PMC4846060.
- 927 93. Di Paola M, Sani C, Clemente AM, Iossa A, Perissi E, Castronovo G, et al.  
928 Characterization of cervico-vaginal microbiota in women developing persistent high-risk Human  
929 Papillomavirus infection. *Sci Rep*. 2017;7(1):10200. Epub 2017/09/02. doi: 10.1038/s41598-  
930 017-09842-6. PubMed PMID: 28860468; PubMed Central PMCID: PMC5579045.
- 931 94. Ranjeva SL, Mihaljevic JR, Joseph MB, Giuliano AR, Dwyer G. Untangling the  
932 dynamics of persistence and colonization in microbial communities. *ISME J*. 2019;13(12):2998-  
933 3010. Epub 2019/08/25. doi: 10.1038/s41396-019-0488-7. PubMed PMID: 31444482; PubMed  
934 Central PMCID: PMC6863904.
- 935 95. Linder J, Zahniser D. ThinPrep Papanicolaou testing to reduce false-negative cervical  
936 cytology. *Arch Pathol Lab Med*. 1998;122(2):139-44. Epub 1998/03/14. PubMed PMID:  
937 9499356.
- 938 96. Ling Z, Liu X, Chen X, Zhu H, Nelson KE, Xia Y, et al. Diversity of cervicovaginal  
939 microbiota associated with female lower genital tract infections. *Microb Ecol*. 2011;61(3):704-14.  
940 Epub 2011/02/03. doi: 10.1007/s00248-011-9813-z. PubMed PMID: 21287345.
- 941 97. Salter SJ, Cox MJ, Turek EM, Calus ST, Cookson WO, Moffatt MF, et al. Reagent and  
942 laboratory contamination can critically impact sequence-based microbiome analyses. *BMC Biol*.

- 943 2014;12(1):87. Epub 2014/11/13. doi: 10.1186/s12915-014-0087-z. PubMed PMID: 25387460;  
944 PubMed Central PMCID: PMCPMC4228153.
- 945 98. Rebolj M, Rask J, van Ballegooijen M, Kirschner B, Rozemeijer K, Bonde J, et al.  
946 Cervical histology after routine ThinPrep or SurePath liquid-based cytology and computer-  
947 assisted reading in Denmark. *Br J Cancer*. 2015;113(9):1259-74. Epub 2015/10/09. doi:  
948 10.1038/bjc.2015.339. PubMed PMID: 26448176; PubMed Central PMCID: PMCPMC4815798.
- 949 99. Naeem RC, Goldstein DY, Einstein MH, Ramos Rivera G, Schlesinger K, Khader SN, et  
950 al. SurePath Specimens Versus ThinPrep Specimen Types on the COBAS 4800 Platform: High-  
951 Risk HPV Status and Cytology Correlation in an Ethnically Diverse Bronx Population. *Lab Med*.  
952 2017;48(3):207-13. Epub 2017/04/06. doi: 10.1093/labmed/lmx019. PubMed PMID: 28379422.
- 953 100. Ritu W, Enqi W, Zheng S, Wang J, Ling Y, Wang Y. Evaluation of the Associations  
954 Between Cervical Microbiota and HPV Infection, Clearance, and Persistence in Cytologically  
955 Normal Women. *Cancer Prev Res (Phila)*. 2019;12(1):43-56. Epub 2018/11/23. doi:  
956 10.1158/1940-6207.CAPR-18-0233. PubMed PMID: 30463989.
- 957 101. Hosomi K, Ohno H, Murakami H, Natsume-Kitatani Y, Tanisawa K, Hirata S, et al.  
958 Method for preparing DNA from feces in guanidine thiocyanate solution affects 16S rRNA-  
959 based profiling of human microbiota diversity. *Sci Rep*. 2017;7(1):4339. Epub 2017/07/01. doi:  
960 10.1038/s41598-017-04511-0. PubMed PMID: 28659635; PubMed Central PMCID:  
961 PMCPMC5489508.
- 962 102. Akahane T, Yamaguchi T, Kato Y, Yokoyama S, Hamada T, Nishida Y, et al.  
963 Comprehensive validation of liquid-based cytology specimens for next-generation sequencing in  
964 cancer genome analysis. *PLoS One*. 2019;14(6):e0217724. Epub 2019/06/15. doi:  
965 10.1371/journal.pone.0217724. PubMed PMID: 31199826; PubMed Central PMCID:  
966 PMCPMC6568385.
- 967 103. Cuschieri KS, Beattie G, Hassan S, Robertson K, Cubie H. Assessment of human  
968 papillomavirus mRNA detection over time in cervical specimens collected in liquid based  
969 cytology medium. *J Virol Methods*. 2005;124(1-2):211-5. Epub 2005/01/25. doi:  
970 10.1016/j.jviromet.2004.11.005. PubMed PMID: 15664071.
- 971 104. Human papillomavirus (HPV) and cervical cancer. [https://www.who.int/news-room/fact-](https://www.who.int/news-room/fact-sheets/detail/human-papillomavirus-(hpv)-and-cervical-cancer)  
972 [sheets/detail/human-papillomavirus-\(hpv\)-and-cervical-cancer](https://www.who.int/news-room/fact-sheets/detail/human-papillomavirus-(hpv)-and-cervical-cancer). Accessed 12 Mar 2020.
- 973 105. Sarangi AN, Goel A, Aggarwal R. Methods for Studying Gut Microbiota: A Primer for  
974 Physicians. *J Clin Exp Hepatol*. 2019;9(1):62-73. Epub 2019/02/19. doi:  
975 10.1016/j.jceh.2018.04.016. PubMed PMID: 30774267; PubMed Central PMCID:  
976 PMCPMC6363981.
- 977
- 978

## 979 **Supporting information**

980 **Figure S1. Comparison of DNA yields by DNA extraction protocols.** DNA yield of  
981 QIAampMini was significantly higher than that of PowerFecalPro ( $p < 0.001$ , Dunn's test with  
982 Benjamini-Hochberg-adjustment). Also, the DNA yield of ZymoBIOMICS was significantly  
983 higher than that of PowerFecalPro ( $p < 0.001$ , Dunn's test with Benjamini-Hochberg-adjustment).  
984 The amount of DNA was calculated based on the absorbance of nucleic acids measured by  
985 Nanodrop One. By the protocol recommended by the manufacturer, nucleic acid (Poly-A carrier)  
986 was used in IndiSpin. Therefore, IndiSpin was excluded from the analysis of DNA yield. The  
987 amount of DNA yield per 100  $\mu$ L ThinPrep sample volume were compared. The bar graph shows  
988 the mean and standard deviation. Zy: ZymoBIOMICS DNA Miniprep Kit, Pro: QIAamp  
989 PowerFecal Pro DNA Kit, QIA: QIAamp DNA Mini Kit.

990

991 **Figure S2. Phylogenetic beta-diversity.** Weighted UniFrac (A & B) and Unweighted UniFrac  
992 (C & D), PCoA colored by subject ID (top row) and DNA extraction kit (bottom row).  
993 Weighted UniFrac clusters samples by subject whereas Unweighted UniFrac appears more  
994 sensitive to the type of DNA extraction kit. Data were rarefied to 51,197 reads per sample.

995

996 **Figure S3. Deicode (Robust Aitchison PCA) beta-diversity.** Non-rarefaction-based analysis of  
997 beta-diversity. Samples are colored by individual subject ID (A) and DNA extraction kit (B).  
998 Samples predominately cluster by subject and not DNA extraction kit.

999

1000 **Figure S4. Community type and HPV 16 assessed by using 4 kits** (A) Community types were  
1001 classified into two types in all DNA extraction kits, mainly based on the percentage of

1002 *Lactobacillus iners*. HPV16 infection was negatively associated with the dominance of *L. iners*  
1003 (community type I;  $p = 0.001$ , Fisher's exact test) regardless of DNA extraction method.  
1004 Although, we observed slight variation in the abundance of microbiota across the extraction kits  
1005 (even within the same individual patient), the ability to detect two community types was  
1006 identical across all DNA extraction kits. No significant differences were observed in the  
1007 relationship of other phenotypes of patients (HPV18, HR-HPV, LR-HPV, multiple HPV  
1008 infections, Biopsy, and Race). The top 15 bacteria detected for each DNA extraction kit are  
1009 shown. Samples were clustered by the Dirichlet component. Narrow columns show each sample  
1010 and a broader column shows averages of samples. Rows show taxa at the species level. Dark or  
1011 thin colors correspond to larger or smaller counts of OTUs, respectively. CT: community type.  
1012 (B) LEfSe analysis, using combined data from all four kits detected a significant enrichment of  
1013 66 taxa in the cervical environment with HPV16 infection and 17 taxa without HPV16 infection.  
1014 Genus *Lactobacillus* were enriched in the HPV16 negative patients ( $p < 0.001$ , LDA score: 5.38).  
1015 Asterisks denote taxa that were significant after post-hoc significant testing with Scheffe test  
1016 [64].  
1017  
1018

(A) Liquid-based cytology on cervix

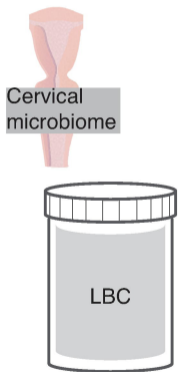

(B) Dispensing of each sample to 4 aliquot

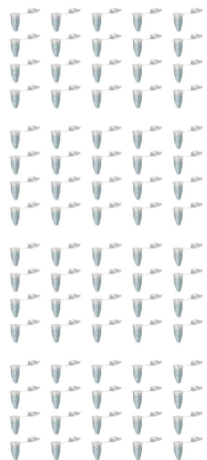

(C) DNA extraction using four protocols

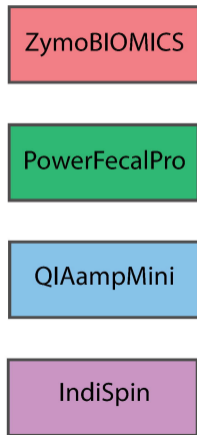

(D)

Positive control  
(vaginal mock)

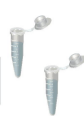

Negative control  
(preservation solution  
without samples)

(E) 16S rRNA  
Illumina ampli-  
con sequencing

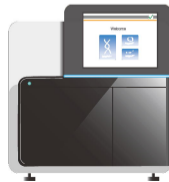

(F) Evaluation of  
taxonomic profiles

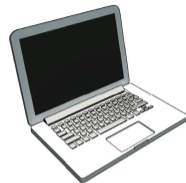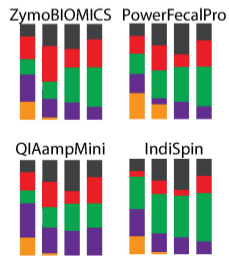

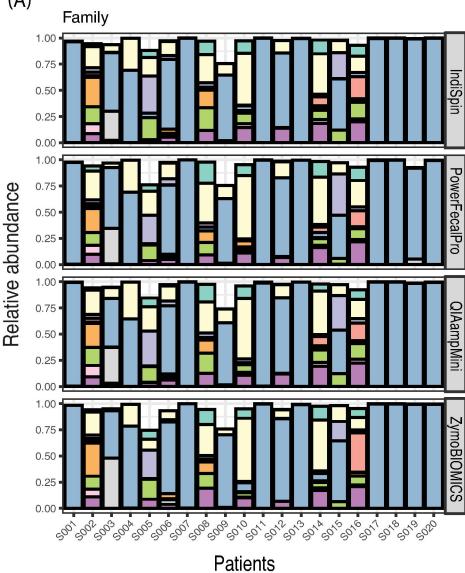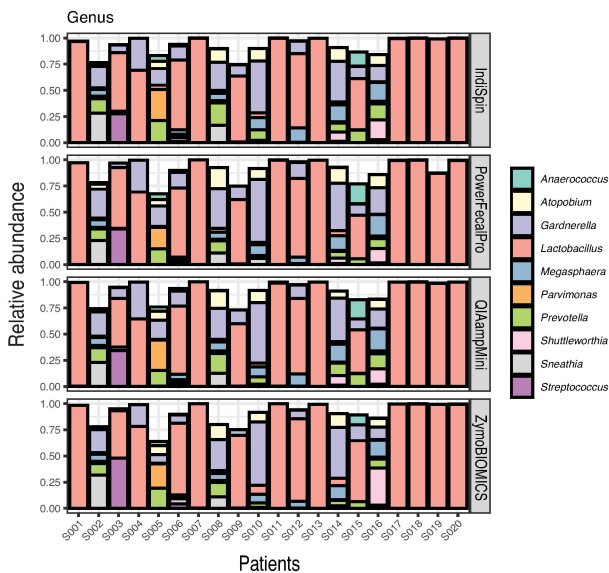

**(B)**

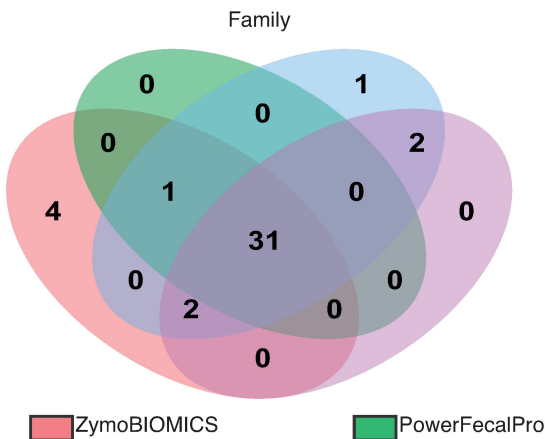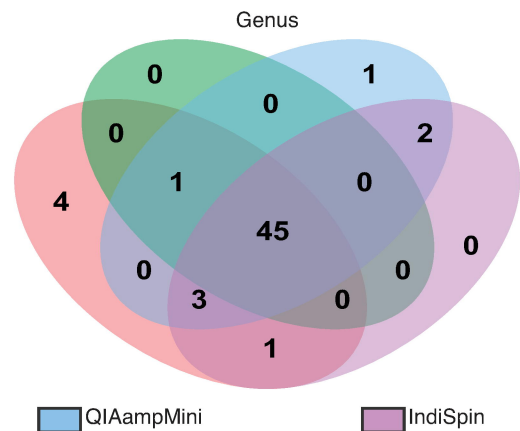

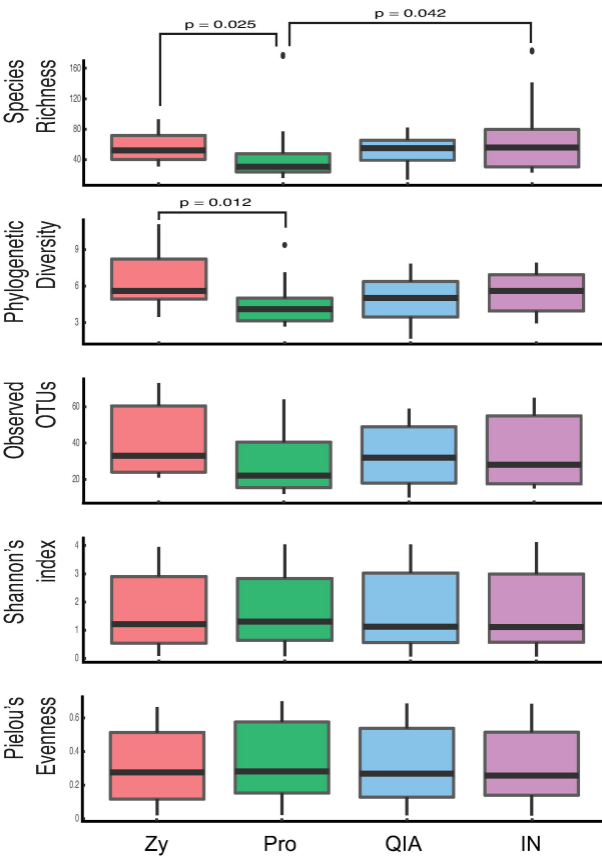



(A)

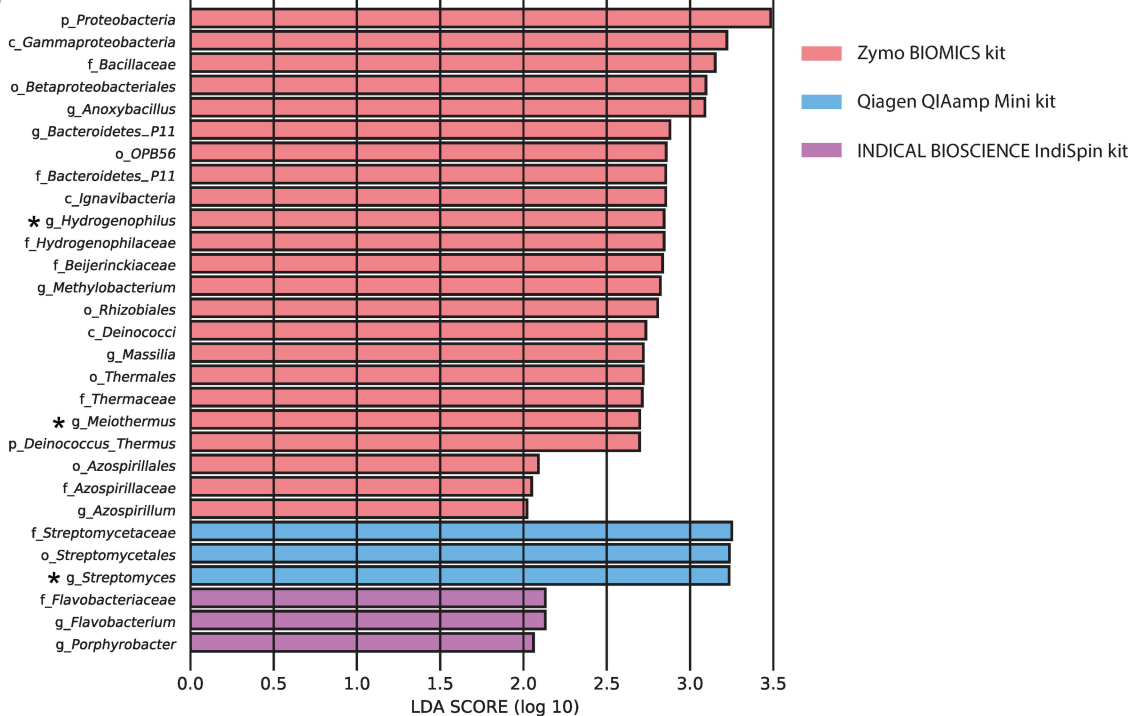

(B)

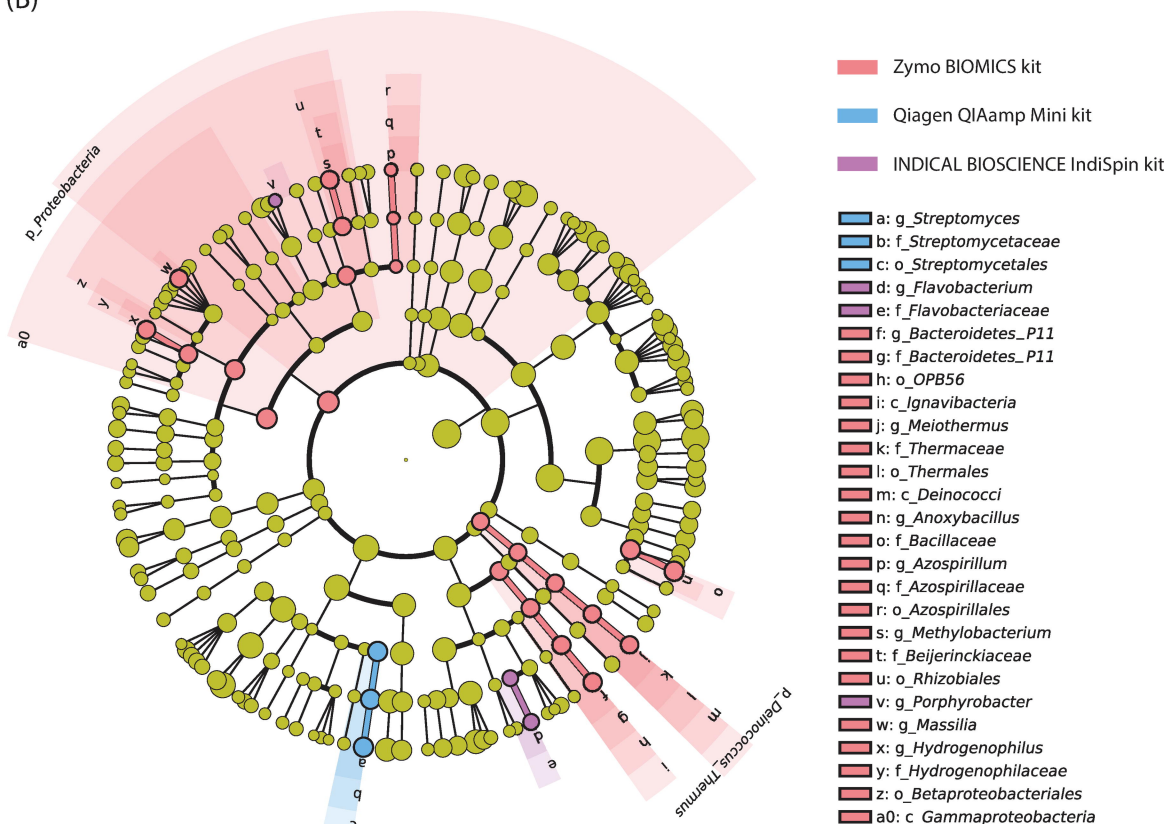

Source: https://www.biorxiv.org/content/10.1101/2020.01.27.921619v3.full.pdf
